# Supplementary material for: A cohort study for the impact of activity-limiting injuries based on the Canadian National Population Health Survey 1994–2006
Source: PubMed Central journal article supplement — BMJ Open. 2013 Mar 13;3(3):e002052. doi: 10.1136/bmjopen-2012-002052 (PMC3612820; doi:10.1136/bmjopen-2012-002052), 2013-03-13
Supplement: bmjopen-2012-002052.draft_revisions.pdf [file bmjopen-2012-002052.draft_revisions.pdf]

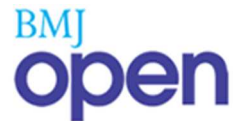

**Impact of Activity-Limiting Injuries based on the Canadian National Population Health Survey 1994-2006**

|                                 |                                                                                                                                                                                                                                                                                                                                                                                                                                                                                                                                                                                       |
|---------------------------------|---------------------------------------------------------------------------------------------------------------------------------------------------------------------------------------------------------------------------------------------------------------------------------------------------------------------------------------------------------------------------------------------------------------------------------------------------------------------------------------------------------------------------------------------------------------------------------------|
| Journal:                        | <i>BMJ Open</i>                                                                                                                                                                                                                                                                                                                                                                                                                                                                                                                                                                       |
| Manuscript ID:                  | bmjopen-2012-002052                                                                                                                                                                                                                                                                                                                                                                                                                                                                                                                                                                   |
| Article Type:                   | Research                                                                                                                                                                                                                                                                                                                                                                                                                                                                                                                                                                              |
| Date Submitted by the Author:   | 11-Sep-2012                                                                                                                                                                                                                                                                                                                                                                                                                                                                                                                                                                           |
| Complete List of Authors:       | Mo, Frank; Centre for Chronic Disease Prevention and Control, Public Health Agency of Canada<br>Neutel, Ineke; Department of Epidemiology, University of Ottawa<br>Morrison, Howard; Centre for Chronic Disease Prevention and Control, Public Health Agency of Canada<br>Hopkins, Doug; Centre for Chronic Disease Prevention and Control, Public Health Agency of Canada<br>Da Silva, Caroline; Centre for Chronic Disease Prevention and Control, Public Health Agency of Canada<br>Jiang, Ying; Centre for Chronic Disease Prevention and Control, Public Health Agency of Canada |
| <b>Primary Subject Heading</b>: | Qualitative research                                                                                                                                                                                                                                                                                                                                                                                                                                                                                                                                                                  |
| Secondary Subject Heading:      | Epidemiology, Public health, Research methods                                                                                                                                                                                                                                                                                                                                                                                                                                                                                                                                         |
| Keywords:                       | EPIDEMIOLOGY, PUBLIC HEALTH, Health & safety < HEALTH SERVICES ADMINISTRATION & MANAGEMENT, Quality in health care < HEALTH SERVICES ADMINISTRATION & MANAGEMENT                                                                                                                                                                                                                                                                                                                                                                                                                      |
|                                 |                                                                                                                                                                                                                                                                                                                                                                                                                                                                                                                                                                                       |

SCHOLARONE™  
Manuscripts

1  
2  
3  
4 **Impact of Activity-Limiting Injuries based on the Canadian National Population Health Survey**  
5 **1994-2006**  
6  
7

8 Frank Mo<sup>1</sup>, PhD; Ineke Neutel<sup>2</sup>, PhD; Howard Morrison, PhD; Doug Hopkins, BA; Caroline Da Silva,  
9 BSc; Ying Jiang<sup>1</sup>, MSc  
10  
11

12 **Author references:**  
13

---

14  
15 <sup>1</sup>Consumer Product Safety and Injury Risk Assessment Program Working Group  
16 Science Integration Division  
17 Centre for Chronic Disease Prevention and Control  
18 Public Health Agency of Canada  
19  
20

21 <sup>2</sup>Department of Epidemiology and Community Medicine, Faculty of Medicine, University of Ottawa  
22  
23  
24  
25  
26  
27  
28  
29

30 **KEYWORDS** Activity limiting injury; impact factors, longitudinal health survey; epidemiology;  
31 injury prevention; Canada.  
32  
33  
34

35 **Correspondence to**  
36

37  
38 Dr. Frank Mo, Science Integration Division  
39 Centre for Chronic Disease Prevention and Control  
40 Public Health Agency of Canada  
41 Frank.Mo@phac-aspc.gc.ca.  
42  
43  
44

45 **Running title: Impact of Activity-Limiting Injury trends**  
46  
47

48 **Word count:**

49 Abstract: 295  
50 Manuscript: 3,496  
51  
52  
53  
54  
55  
56  
57  
58  
59  
60

## ABSTRACT

**Objective:** To examine the impact factors of activity-limiting injuries (ALI) on individuals and on the Canadian population; to detect short and long term impact after injuries in the Canadian National Population Health Survey (NPHS) from 1994 to 2006.

**Design:** This is a randomised longitudinal cohort study with biennial interview, which ranged from age, sex, education, marital status, income, residence, height and weight to self-perceived health status, health care utilization and medication use.

**Setting:** The study population was drawn from the NPHS with a random sample of 7,300 to 8,300 participants in both sexes over 20 years old from ten provinces and three territories in Canada.

**Primary and secondary outcome measures:** Logistic regression models were used to detect the potential impact of ALI on individuals and on Canadian population. The interviews two years before and two years after the ALI were compared to examine long-term effects, and the McNemar test option in SAS was used for the matched analysis.

**Results:** The immediate impact was pain, disability, disruption of regular life. Long-term effects in patients were chronic pain and increased medical doctor visits after ALI. Population impact included loss of productivity of 10% of the most productive and a considerable increase in health care access and cost. The odds ratios (ORs) for the 20-39 age group and males is more than for females for most years (OR, 2.2; 95% CI, 1.8-2.7 and OR, 1.4; 95% CI, 1.1-1.6). Individuals consuming nine or more alcoholic drinks per week have significantly differences (OR, 1.5; 95% CI, 1.3-1.8).

**Conclusion:** The findings from this study illustrated the immediate and long term impact of individuals and population level injuries in Canada. Injury control policies should aim to prevent the both the number of injuries fatalities as well as the consequences among survivors.

### Summary Boxes:

What is already known on this subject?

1. Activity-limiting injuries (ALI) burden such as increased steadily prevalence, mortality and economic costs in Canada;
2. Showing increasing trends in obesity, limited activity, poor health status, medication use related to ALI;
3. Nature and types related to ALI;

What does this study add?

1. Potential associations between health care utilization and ALI before and after injury;
2. Hospital admission, Department emergency and medical doctors visits impacted on ALI;

3. The immediate individuals impact such as pain, disability, disruption of regular life. Long-term effects in patients were sequelae, chronic pain, stress and increased medical doctor visits after ALL. Population impact included loss of productivity of 10% of the most productive and a considerable increase in health care access and cost.
4. policies should aim to prevent both the number of injuries fatalities as well as the consequences among survivors.

**Competing Interest:**

None to declare.

**Funding Statement:**

This research received no specific grant from any funding agency in the public, commercial or not-for-profit sectors.

**Contributorship Statement:**

Dr. Frank Mo, leader of the research project, and play the major role in research design, drafted the article and critical review, and advising for data analysis and results interpretation.

Dr. Ineke C. Neutel, contributed to data analysis, assisted in research design and data analysis, interpretation, and the report.

Dr. Howard Morrison, contributed to research consultation, provided critical review comments, and advising for data analysis and revised critically the article.

Mr. Doug Hopkins, assisted in research design, provided literature review and critical comments and signed final version of the manuscript.

Ms. Caroline Da Silva, participated in research design, provided critical review comments and signed final version of the manuscript.

Ms. Ying Jiang, contributed to research design, provided literature and critical review comments, and signed final version of the manuscript for submission.

## INTRODUCTION

Injuries are a serious public health issue with a major impact on the lives of Canadians. They are leading causes of death and hospitalization, as well as of disability, loss of productivity and potential years of life lost (PYLL) [1]. Sequelae from injuries can impact the quality of life for individuals and population levels, such as activity limitation, functional disability and pain as process influenced by a variety of social, psychological, and economic factors [2–5]. A rather complete analysis of injury in Canada was based on emergency department (ED) visits and hospitalisation admissions for all of Ontario province [6]. The analysis noted that one in four ED visits were injury-related, as were one in every 17 hospitalisations [6]. These data accentuate the importance of injuries to the health care system. Other studies have also demonstrated the increasing medical doctor (MD) contact, the use more medications for pain, more days in hospital, and more hours of home care services [6-8].

Several studies of traumatic disability have also focused on injuries resulting in hospitalization [9], types of injury [10-11], and serious head injuries [12]. Moreover, half of patients had some limitation in activity for two days or more due to injury, and patients treated in the clinic were somewhat more likely to have two or more days of limited activity than were patients treated in the ED [13].

Injuries are not only preventable, but the impact of injuries could also be lessened. In order to develop effective policies leading to prevention of injuries and reduced impact of injuries on society, information is needed about the influenced effects that individuals with injuries treated in the primary care setting and not requiring hospitalization frequently result in significant functional impairment and

1  
2  
3  
4 to identify those injuries which, by virtue of their contribution to disability, would be targets for  
5  
6 prevention programs.  
7  
8  
9

10  
11 The objectives of this study are to explore the immediate and longer term consequences of injury  
12 including physical, psychological, social and occupational functioning. This comprises a longitudinal  
13 population health study, which will measure the impact of injuries on individual's and population level  
14 health status and well-being due to activity-limiting injuries (ALI) in the NPHS from 1994 to 2006 in  
15  
16  
17  
18  
19  
20  
21 Canada.  
22  
23  
24  
25

## 26 **METHODOLOGY**

### 27 **Study population**

28  
29  
30 The source population for this study is the Canadian National Population Health Survey (NPHS),  
31 from 1994/1995 (cycle 1) to 2006/2007 (cycle 7) with 17,276 of the respondents in the survey except for  
32  
33  
34  
35  
36  
37  
38  
39  
40  
41  
42  
43  
44  
45  
46  
47  
48  
49  
50  
51  
52  
53  
54  
55  
56  
57  
58  
59  
60  
persons living on reserves or on Canadian Forces bases [6, 8]. The sample design is a multiple cluster  
[14]. The sampling frame for the first cycle (1994/5) originated with the Canadian Labour Force  
Survey (CLFS), a multi-stage, stratified sampling technique used for all provinces except Quebec for  
which a provincial sampling frame was used [14]. In the second cycle 1996-1997 the NPHS started  
using 17,276 of the respondents for a longitudinal component. For the 2000 cycle a few changes were  
made in the questionnaire including more detailed questions on health care use after the ALI.

Nearly all respondents were re-interviewed biennially by telephone except for individuals  
without telephone, for whom face to face interviews were used. Interviewers were instructed to follow

1  
2  
3  
4 all reasonable strategies to trace people. Response rates were 83.6% from cycle one to cycle two-92.8%,  
5  
6 cycle three-88.3%, cycle four-84.9%, cycle five-80.8%, cycle six-77.6%, and cycle seven-77.0%.  
7  
8  
9

10  
11 For the present study, interview cycles for 1996 to 2006 were used. Data were used from  
12  
13 respondents who were willing to share their data for data analysis, and who completed all interviews to  
14  
15 date and achieved ages 20 and over. Since the source population, i.e. the total NPHS population,  
16  
17 covered more ages than the study population, i.e. the population analysed for this study, it was possible  
18  
19 to add younger persons from the source population to our study population after the cycle at which they  
20  
21 reached age of 20 years old. Consequently, the study population changed somewhat over the years of  
22  
23 the study, 1996 to 2006 allowing comparable cross-sectional analysis of populations with the same age  
24  
25 range and age distribution.  
26  
27  
28  
29  
30  
31  
32

### 33 **Variables**

34  
35 The interview ranged from background questions (age, sex, education, marital status, income,  
36  
37 residence, height and weight) to health-related questions (self-perceived health status, health care  
38  
39 utilization and medication use). For this study the answers were dichotomized. Body mass index (BMI)  
40  
41 was calculated as weight in kilograms divided by height in meters squared [15]. A BMI of 30 and over  
42  
43 was considered obese. Respondents were asked to rate their health as one of five categories: excellent,  
44  
45 very good, good, fair or poor and for this study, the lower two categories were combined as poorer  
46  
47 health and the top three as good health. Quartiles of total household income were calculated for the  
48  
49 population and the lower two quartiles combined for the low income category to be compared to the top  
50  
51 two as highest income category. A three-part physical activity index was calculated based on kilo-  
52  
53  
54  
55  
56  
57  
58  
59  
60

1  
2  
3  
4 calories per kilogram of body weight per day expended (KKD). Physically active is defined as energy  
5  
6 expenditure of at least 3 KKD; moderately active corresponds to energy expenditure between 1.5 and 3  
7  
8 KKD; physically inactive is defined as less than 1.5 KKD. Medication use was elicited by the question:  
9  
10 “In the past 30 days, did you take . . . ?” This was followed by a series of questions, such as “Did you  
11  
12 take antidepressants?” “Did you take anything for pain?” A 'no' answer to the question "Are you  
13  
14 usually free of pain and discomfort?" was taken as indication that the respondent often suffered pain.  
15  
16  
17  
18  
19  
20

21 The definition of injury in the NPHS data was “In the past 12 months, did you have any injuries  
22  
23 serious enough to limit your normal activities?” If more than one, the following questions were to refer  
24  
25 to the most serious one. A separate question asked respondents a general question about limitations in  
26  
27 activity, “Because of a long-term physical or mental condition or a health problem, are you limited in the  
28  
29 kind or amount of activity you can do: at home? at school? at work? in other activities?”  
30  
31  
32  
33  
34

### 35 **Data Analysis**

36  
37 For the statistical analysis, SAS version 9.2 (SAS Institute, Cary, NC, USA) was used. Logistic  
38  
39 regression provided odds ratios (OR) with presence/absence of ALI as the dependent variable, adjusted  
40  
41 for age (in single years) and sex. Since the data were collected as a statistical sample of the Canadian  
42  
43 population, the ‘weight’ option was used in all SAS statistical analyses to make the results representative  
44  
45 of the Canadian population from 1994 to 2006 in seven cycles of cross-sectional studies. Weights were  
46  
47 provided by Statistics Canada according to their sampling procedures. In order to produce a meaningful  
48  
49 estimate of the variance for the weighted results, the weights were adjusted using the formula: [average  
50  
51 weight = (sample weight/sum of the sample weights) \* sample size].  
52  
53  
54  
55  
56  
57  
58  
59  
60



1  
2  
3  
4  
5  
6  
7 In order to determine the characteristics, life style and health status, medical attention and health  
8 care utilization as well as activity limitation and disability, which were impacted by ALI, all new injury  
9 cases, i.e., those who had not reported an injury in the previous interview were identified. For each new  
10 case, data from three cycles were selected, 1) the cycle before reporting, 2) the cycle of reporting, 3) the  
11 cycle after reporting. Data for the 1994 cycle were used only in this 'before and after' analysis. Only  
12 the first recorded ALI report per person was included. The McNemar test option in SAS was used for  
13 matched analysis.  
14  
15  
16  
17  
18  
19  
20  
21  
22  
23  
24  
25

## 26 RESULTS

27  
28 The numbers of ALI in adult Canadians increased from 755 cases in 1996 to 1,006 in 2006 (not  
29 shown in table). The weighted prevalence of all ALI increased steadily from 10.5% in 1996 to 12.8% in  
30 2006. The population is showing increasing trends in obesity, limited activity, poor health status,  
31 medication use, and potential injury sequelae, such as pain, stress and depression but declining trends in  
32 lower income and current smoking (**Table 1**). The weighted percentages of medical doctor (MD) visits  
33 decreased from 29.8% to 25.3%, emergency department (ED) visits went from 34.0% to 28.8%, and  
34 hospital admission within 48 hours went from 6.5% to 4.9% from 2000-2006 for all ALI (**Table 2**). The  
35 rate of hospital admissions within 48 hours for adults aged 50+ years was higher than that of young aged  
36 (20-49) group. Rates of ALI for males were higher and increased more than for females. Furthermore,  
37 younger adults (20-49 yrs.) tended to have more ALI (12.2% to 14.0%) than the older (50+ yrs.) adults  
38 (8.6% to 9.8%) (**Table 3**).  
39  
40  
41  
42  
43  
44  
45  
46  
47  
48  
49  
50  
51  
52  
53  
54  
55  
56  
57  
58  
59  
60

1  
2  
3  
4 The most frequent types of ALI were sprains and strains (42%), followed by fractures and  
5 dislocations (20%), and cuts, punctures and bites (10%) (Table 4). Only 3.3 to 5.0% of ALI were in the  
6 category of brain, internal and multiple injuries. Men tend to have more cuts, punctures and bites while  
7 women have more scrapes, bruises and blisters. Younger ages tend to have more sprains and strains and  
8 older ages more fractures and dislocations (Table 4). Logistic regression analysis indicated that  
9 younger age groups and male participants were more impacted by ALI, the OR for the 20-39 age group  
10 and males is more than for females for most years. Only a few of the other variables show associations  
11 with ALI - immigrants have consistently lower rates of ALI, while people consuming nine or more  
12 alcoholic drinks per week have significantly higher rates. (Table 5).  
13  
14  
15  
16  
17  
18  
19  
20  
21  
22  
23  
24  
25  
26  
27

28 Attributes in the interview cycle before the ALI were compared with the rates in the interview  
29 year with the ALI and rates in the cycle after the ALI (Table 6). Some attributes showed higher rates  
30 for the cycle with the ALI compared to the previous one, i.e., two years earlier, and then continued the  
31 higher rate in the next cycle, i.e., two years after the ALI. This was true for limited activity, medical  
32 doctor (MD) visits, experiencing pain, medication use for pain, sedatives/ tranquillizers, and  
33 antidepressants for the patients with stress and depression ( $P<0.001$ ) (Table 6).  
34  
35  
36  
37  
38  
39  
40  
41  
42  
43  
44  
45  
46

## 47 DISCUSSION

48  
49 Clearly, the impact of ALI can be found on several different levels. Immediate consequences  
50 were experienced by the more than 10% of the Canadian population who annually report an ALI, with  
51 rates increasing from 10.5% in 1996 to 12.8% in 2006. According to the definition of ALI as activity-  
52  
53  
54  
55  
56  
57  
58  
59  
60

1  
2  
3  
4 limiting injuries, all people with ALI experience a certain amount of disruption of their daily activities  
5  
6 with the impact varying according to the type and severity of their injury and depending on their  
7  
8 customary type of activity [16-19]. The most severe injury includes the 3-6% of ALI with brain, internal  
9  
10 and multiple injuries. About 20% of ALI were fractures and dislocations, many of whom necessitate a  
11  
12 period of altered activity. The elderly people are more likely to experience fractures than the younger  
13  
14 age groups. The most common injuries are sprains and strains, the impact of which also varies a great  
15  
16 deal depending on type and severity [20-21]. Groups most impacted by ALI were men and the younger  
17  
18 ages, and thus more likely to have their busy schedules and possibly income, as well as that of their  
19  
20 families disrupted. A widespread impact of injuries are on the workplace through absenteeism and on the  
21  
22 family through the disruption of customary activities. Besides the impact of injuries on every day  
23  
24 activities, there is also the impact on the health care system. About two thirds of people with ALI  
25  
26 sought some kind of medical care in the year 2000. Evidence was presented showing that the impact of  
27  
28 ALI might be even more far-reaching, as seen by the higher levels of medical care, and continued pain  
29  
30 remaining two years after the ALI were reported.  
31  
32  
33  
34  
35  
36  
37  
38  
39

40 Other research on injuries have used a variety of definition of injuries, based on different sources  
41  
42 of information. Questions in the NPHS were able to put these other measures in perspective when  
43  
44 compared to ALI. For example, some studies use hospital-based data [22], but the present study shows  
45  
46 that only about 5% of ALI are admitted to hospital within the first 48 hours of the event. Assuming that  
47  
48 all injuries that require hospitalization are within the activity-limiting rubric, it is clear that studies done  
49  
50 on hospital data include only a small portion of important injuries [23]. However, the hospitalized  
51  
52 injuries will be the more severe injuries which take a disproportional share of the health care cost and  
53  
54  
55  
56  
57  
58  
59  
60

1  
2  
3  
4 disability [22]. Other studies have used ED visits as unit of measurement [6]. The present study showed  
5  
6 less than one third of ALI went to an ED to obtain treatment. Again, the latter are the more severe  
7  
8 injuries or those needing specialized treatment, e.g., casts on fractures, and thus have a greater impact  
9  
10 on daily life and cost. Another source of data commonly used has been mortality data. Although deaths  
11  
12 are definitely activity-limiting, obviously, none are included in this study. Mortality rates will also refer  
13  
14 to a quite different range of injuries than ALI. For example, in an US study, firearm-related injuries  
15  
16 were 22% of all injury deaths, second only to traffic accident related injuries, but firearms amounted to  
17  
18 less than 1% for non-fatal injuries [8]. Thus, different measuring units for measuring injury rates will  
19  
20 target different slices of the spectrum of injuries and provide different results. ALI are of special public  
21  
22 health importance not sufficiently studied.  
23  
24  
25  
26  
27  
28  
29

30 Another level of impact resulting from ALI would consist of impact on the health care system.  
31  
32 Approximately 60% of people with ALI obtain medical care of some type. Of these, approximately one  
33  
34 third of persons with ALI went to ED to experience the often long wait before receiving treatment. Back  
35  
36 at home the patient would not only experience the pain and disability of the ALI, but also the need to  
37  
38 negotiate the health care system, such as making appointments with physicians, specialists,  
39  
40 physiotherapists, etc., finding transportation, often needing someone to accompany them [24-27]. Even  
41  
42 though the proportion of the population with ALI increased over the years 2000-2006, decreases were  
43  
44 seen in use of primary care and the hospital ED visits as well as hospitalisation. This decrease in health  
45  
46 care use could be an indication either of greater difficulty in accessing health care, or the ALI reported  
47  
48 becoming less severe over the years. Berdahl found variation by ethnic group and sex, both in the  
49  
50 reporting of work-related injuries and in the seeking of medical care and the change in ethnic  
51  
52  
53  
54  
55  
56  
57  
58  
59  
60

1  
2  
3  
4 composition over the years could also be a factor in the NPHS data [28-30]. In any case, ALI are  
5  
6 suffered by a large proportion of the population annually, and a majority of these seek medical treatment  
7  
8 whether primary care, ED or hospital care. Some of these would need an ambulance for transportation.  
9  
10 Clearly, this entails a large cost to the health care system and any prevention would not only improve  
11  
12 quality of life of the putative victims but also would result in significantly lower health care costs.  
13  
14  
15  
16  
17  
18

19 Another type of impact would be long-term changes after the injury. The 'before and after' data  
20  
21 available in the NPHS consisted of comparing the cross-sectional data from the interview cycle before  
22  
23 the ALI with the data of the cycle reporting the ALI and with the next cycle after the ALI. While the  
24  
25 interviews for each respondent could be linked for the 'before and after' cycles it was more difficult to  
26  
27 determine which changes in attributes in the year of the ALI or subsequent years were sequelae of the  
28  
29 ALI. For example, it might make sense that the increasing obesity for people with ALI be linked to  
30  
31 after-effects, e.g. [31], due to inactivity resulting from the ALI but, in fact, similar changes are  
32  
33 happening in the overall population. Given these caveats, we can note that no changes were found for  
34  
35 smoking and little change in excessive alcohol use. Most likely to show long-term effects due to ALI  
36  
37 were visits to medical doctors and ongoing pain. People with ALI showed increasing likelihood of  
38  
39 visiting a MD at least five times during the year which continued for the subsequent cycle. Similarly  
40  
41 pain increased in the cycle with the ALI and remained high over the years. Although this is weak  
42  
43 evidence, it confirms work on long-term effects of other researchers [32-33] and again emphasizes the  
44  
45 impact of ALI in the population.  
46  
47  
48  
49  
50  
51  
52  
53

54 Injuries have been found to lead to lost productivity, medical costs, compensation cost and  
55  
56  
57  
58  
59  
60

1  
2  
3  
4 possibly long-term health problems and disability [34-36], which was confirmed by the present results  
5  
6 for the Canadian population. Many injuries can be prevented and a better understanding of all aspects of  
7  
8 injuries will lead to better ways of prevention or the minimizing of their effects. However, collaboration  
9  
10 and cooperation is needed [37]. The European Union has committed itself to reducing number of traffic  
11  
12 fatalities from 450,000 to 235,000 by 2010, which as Goule et al., point out, will require strong measures  
13  
14 against use of alcohol [38-41], illicit and medicinal drugs before driving [42]. A difficulty is the multi-  
15  
16 faceted aspect of injuries. For example, a fall may have many causes, such as unsafe working conditions  
17  
18 or slippery stairs at home. Each of these would require different approaches to prevention. Similar  
19  
20 diversities are found for most other types of injuries. With all difficulties inherent in devising effective  
21  
22 interventions, prevention is still the best approach to lower the tremendous impact of ALI on the  
23  
24 Canadian population.  
25  
26  
27  
28  
29  
30  
31  
32

33 The NPHS data have important strengths, such as its representativeness of the Canadian  
34  
35 population and its longitudinal nature. Because of the longitudinal design, it was possible to identify  
36  
37 new ALI, meaning no ALI in the previous interview, and compare risk factors before and after the event,  
38  
39 as well as its consequences. The 'before and after' comparisons of the same person allowed for matched  
40  
41 analysis at different times. Important also is the extensive and consistent information available on each  
42  
43 respondent over the multiple cycles of the survey, such as type of ALI, and the medical care needed.  
44  
45 Besides strengths, the NPHS also has limitations. In spite of the abundance of data available, further  
46  
47 information is always desirable for particular uses of the data. One issue is the lack of distinction  
48  
49 between intentional and unintentional injuries, another is the large time spans over which the  
50  
51 information is available. Another issue is that of self-reported data. Part of self-reporting is recall of  
52  
53  
54  
55  
56  
57  
58  
59  
60

1  
2  
3  
4 events. Recall of having had ALI has been shown elsewhere to be less accurate with increasing time and  
5  
6 is also likely to vary with severity of the injury [43-44]. Both of these would likely lead to an under-  
7  
8 reporting of ALI. In spite of its limitations the NPHS gives an invaluable view of the level of serious  
9  
10 injury in the Canadian adult population over a 12 year time period.  
11  
12  
13

14  
15  
16 Another strength of these data is the use of ALI as a measurement of injury. There are various  
17  
18 units of measurement in measuring rates of injury in a population. The unit of measurement used in the  
19  
20 present study consists of the most serious ALI over the previous 12 months, excluding repetitive strains  
21  
22 injuries. The use of ALI means the delimitation of a particular kind of injury in the spectrum of injuries  
23  
24 as a concept meaningful to both respondent and researchers. In addition, it identifies a type of injury  
25  
26 sufficiently severe to impact a person's regular routine.  
27  
28  
29  
30  
31

## 32 33 CONCLUSION

34  
35 The findings from this study quantified the immediate and long term impact of individuals and  
36  
37 population level injuries in Canada. The immediate impact was pain, disability, and disruption of regular  
38  
39 life. The two-thirds seeking medical care needed time, effort and know-how to negotiate the health care  
40  
41 system, let alone transportation and other related help. Long-term effects in patients were chronic pain  
42  
43 and increased medical doctor's visits remaining two years after the ALI. Population impact included  
44  
45 loss of productivity of 10% of the most productive and a considerable increase in health care access and  
46  
47 cost. This study also particularly contributes to injury prevention in social and psychological health  
48  
49 services to help injured people make a better recovery and maintain the quality of life after injuries.  
50  
51  
52  
53  
54  
55  
56  
57  
58  
59  
60

1  
2  
3  
4  
5 **REFERENCES**  
6

- 7 1. Centre for Surveillance Coordination HC. Injury Surveillance in Canada: Current realities and  
8 Challenges. Ottawa: 2003; Health Canada.  
9
- 10 2. Frank JW, Brooker AS, DeMaio S et al. Disability resulting from occupational low back pain part II:  
11 What do we know about secondary prevention? A review of the scientific evidence on prevention after  
12 disability begins. *Spine* 1996; 21(24): 2918–2929.  
13
- 14 3. Krause N, Frank JW, Dasinger LK et al. Determinants of duration of disability and return to work  
15 after work-related injury and illness: Challenges for future research. *Am J Industr Med* 2001; 40:464–  
16 484.  
17
- 18 4. Krause N, Ragland DR. Occupational disability due to low back pain: A new interdisciplinary  
19 classification based on a phase model of disability. *Spine* 1994; 19(9):1011–1020.  
20
- 21 5. Verbrugge LM, Jette AM. The disablement process. *Soc Sci Med* 1994; 38(1): 1–14.  
22
- 23 6. MacPherson AK, Schull M, Manuel D et al. Injuries in Ontario: ICES Atlas. Toronto: Institute for  
24 Clinical Evaluative Sciences 2005;  
25
- 26 7. MacKenzie EJ: Epidemiology of injuries: current trends and future challenges. *Epidemiol Rev* 2000;  
27 22: 112-9.  
28
- 29 8. Schneier AJ, Shields BJ, Hostetler SG et al. Incidence of Pediatric Traumatic Brain Injury and  
30 Associated Hospital Resource Utilization in the United States. *Pediatrics*. 2006; 118 (2): 483-492.  
31
- 32 9. Mayer T, Walker ML, Clark P. Further experience with a modified Abbreviated Injury Severity Scale.  
33 *J Trauma*. 1984; 24:31-34.  
34
- 35 10. Kraus JF, Fife D, Conroy C. Pediatric brain injuries: the nature, clinical course, and early outcomes  
36 in a defined United States' population. *Pediatrics*. 1987; 79:501-507.  
37
- 38 11. Casey R, Ludwig S, McCormick MC. Morbidity following minor head trauma in children.  
39 *Pediatrics*. 1986; 78:497-502.  
40
- 41 12. Kraus JP, Fife D, Cox P et al. Incidence, severity and external causes of pediatric brain injury.  
42 *AJDC*. 1986; 140:687-693.  
43
- 44 13. Rivara FP, Calonge N, and Thompson R. Population-Based Study of Unintentional Injury Incidence  
45 and Impact during Childhood. *Am J Public Health* 1989; 79:990-994.  
46
- 47 14. Tambay J-L, Catlin G. Sample design of the National Population Health Survey. *Health Reports*  
48 (Statistics Canada, Catalogue 82-003). 2006; 7(1): 29-38.  
49  
50  
51  
52  
53  
54  
55  
56  
57  
58  
59  
60



15. World Health Organization. What are overweight and obesity? Factsheet 2006; N°.311.
16. Majori S, Ricci G, Capretta F et al. Epidemiology of domestic injuries. A survey in an emergency department in North-East Italy. *J Prev Med Hyg.* 2009; 50: 164-9.
17. Scheiman S, Moghaddas HS, Bjornstig U et al. Bicycle injury events among older adults in Northern Sweden: a 10-year population based study. *Accid Anal Prev.* 2010; 42: 758-63.
18. Ahmed LA, Schirmer H, Bjornerem A et al. The gender- and age-specific 10-year and lifetime absolute fracture risk in Tromso, Norway. *Eur J Epidemiol.* 2009; 24 : 441-8.
19. Ahmed LA, Emaus N, Berntsen GK, et al. Bone loss and the risk of non-vertebral fractures in women and men: the Tromso study. *Osteoporos Int.* 2010; 21: 1503-11.
20. Aschkenasy MT, Rothenhaus TC. Trauma and falls in the elderly. *Emerg Med Clin North Am.* 2006; 24: 413-32.
21. Wilkins K. Medications and fall-related fractures in the elderly. *Health Rep.* 1999; 11: 45-53 .
22. Frisina PG, Guellnitz R, Alverzo J. A time series analysis of falls and injury in the inpatient rehabilitation setting. *Rehabil Nurs.* 2010; 35:141-6.
23. Pickett W, Hartling L, Brison RJ. A population-based study of hospitalized injuries in Kingston, Ontario, identified via the Canadian Hospitals Injury Reporting and Prevention Program. *Chronic Dis Can* 1997; 18: 61-9.
24. Dryden DM, Saunders LD, Rowe BH et al. Utilization of health services following spinal cord injury: a 6-year follow-up study. *Spinal Cord.* 2004; 42:513–525.
25. Brown JA, Shannon HS, McDonough P et al. Healthcare Use of Families of Injured Workers Before and After a Workplace Injury in British Columbia, Canada. *Healthcare Policy*, 2007; 2(3): 1-124.
26. Berthelot J-M and the Project Team. Injury hospitalizations and socio-economic status. Ottawa, Ontario: 2010; CIHI.
27. Compston J. Osteoporosis: social and economic impact. *Radiol Clin North Am.* 2010; 48:477-82.
28. Berdahl TA, Zodet M. Medical care utilization for work-related injuries in the United States 2002-2006. *Med Care* 2010; 48: 645-51.
29. de Castro AB, Fujishiro K, Rue T et al. Associations between work schedule characteristics and occupational injury and illness. *Int Nurs Rev.* 2010; 57: 188-94.
30. Lombardi DA, Folkard S, Willetts JL et al. Daily sleep, weekly working hours, and risk of work-related injury: US National Health Interview Survey (2004-2008). *Chronobiol Int.* 2010; 27(5):1013-30.

- 1  
2  
3  
4  
5 31. Bergkvist D, Hekmat K, Svensson T et al. Obesity in orthopedic patients. *Surg Obes Relat Dis*.  
6 2009; 5:670-2.  
7  
8 32. Cameron CM, Kliewer EV, Purdie DM et al. Long term health outcomes after injury in working age  
9 adults: a systematic review. *J Epidemiol Community Health* 2006; 60: 341-4.  
10  
11 33. Toft AM, Moller H, Laursen B. The years after an injury: long-term consequences of injury on self-  
12 rated health. *J Trauma* 2010; 69: 26-30.  
13  
14 34. Borgstrom F, Zethraeus N, Johnell O, et al. Costs and quality of life associated with osteoporosis-  
15 related fractures in Sweden. *Osteoporos Int* 2006; 17: 637-50.  
16  
17 35. Brinsky A, Glick H, Lydick E, et al. The economic cost of hip fractures in community-dwelling  
18 older adults: a prospective study. *J Am Geriatr Soc* 1997; 45: 281-7.  
19  
20 36. Hendrie D, Hall SE, Arena G et al. Health system costs of falls of older adults in Western Australia.  
21 *Aust Health Rev* 2004; 28: 363-73.  
22  
23 37. Sleet DA, Moffett DB. Framing the problem: injuries and public health. *Fam Community Health*  
24 2009; 32: 88-97.  
25  
26 38. Desapriya E, Pike I, Raina P. Severity of alcohol-related motor vehicle crashes in British Columbia:  
27 case - control study. *Int J Contr Saf Promot*. 2006; 13: 89-94.  
28  
29 39. Kool B, Ameratunga S, Robinson E et al. The contribution of alcohol to falls at home among  
30 working-aged adults. *Alcohol*. 2008; 42: 383-8.  
31  
32 40. Kool B, Ameratunga S, Jackson R. The role of alcohol in unintentional falls among young and  
33 middle-aged adults: a systematic review of epidemiological studies. *Inj Prev*. 2009; 15: 341-7.  
34  
35 41. Ahlm K, Bjornstig U, Ostrom M. Alcohol and drugs in fatally and non-fatally injured motor vehicle  
36 drivers in northern Sweden. *Accid Anal Prev*. 2009; 41:129-36.  
37  
38 42. Gouille JP, Verstraete A, Boulu R, et al. Illicit drugs, medications and traffic accidents. *Ann Pharm*  
39 *Fr* 2008; 66: 196-205.  
40  
41 43. Wilkins K, Mackenzie SG. Work injuries. *Health Rep*. 2007; 18: 25-42.  
42  
43 44. Warner M, Schenker N, Heinen MA et al. The effects of recall on reporting injury and poisoning  
44 episodes in the National Health Interview Survey. *Inj Prev* 2005; 11: 282-7.  
45  
46  
47  
48  
49  
50  
51  
52  
53  
54  
55  
56  
57  
58  
59  
60

**Table 1: Weighted percentages of characteristics of ALI for which were impacted on the study population, NPHS, Canada, 1994-2006**

| Year                                   | 1996             | 1998             | 2000             | 2002             | 2004             | 2006             |
|----------------------------------------|------------------|------------------|------------------|------------------|------------------|------------------|
|                                        | wt% <sup>1</sup> |
| Total Number <sup>2</sup>              | 7,313            | 7,529            | 7,717            | 7,875            | 8,085            | 8,324            |
| ALI (wt%)                              | 10.5             | 10.9             | 11.4             | 12.6             | 12.6             | 12.8             |
| <b>Background variables</b>            |                  |                  |                  |                  |                  |                  |
| Partner                                | 71.0             | 69.3             | 68.2             | 66.2             | 65.7             | 64.7             |
| Low income                             | 40.0             | 34.2             | 27.9             | 26.0             | 23.5             | 19.8             |
| Completed High School                  | 89.6             | 89.9             | 89.3             | 84.7             | 84.5             | 84.5             |
| Rural                                  | 17.9             | 20.5             | 21.0             | 20.6             | 19.9             | 22.0             |
| Immigrant                              | 17.5             | 17.3             | 16.8             | 16.2             | 16.1             | 15.7             |
| <b>Health related variables</b>        |                  |                  |                  |                  |                  |                  |
| Current smoking                        | 22.7             | 21.3             | 20.4             | 17.1             | 17.1             | 16.0             |
| Inactive                               | 58.3             | 52.9             | 56.1             | 48.3             | 51.0             | 45.9             |
| Obese                                  | 18.4             | 21.2             | 23.0             | 24.3             | 25.0             | 26.4             |
| 9+ alcohol drinks/ week                | 11.0             | 11.6             | 11.9             | 11.8             | 11.6             | 14.8             |
| <b>Region of residence</b>             |                  |                  |                  |                  |                  |                  |
| Atlantic                               | 8.8              | 8.7              | 8.9              | 8.8              | 8.7              | 8.7              |
| Quebec                                 | 25.5             | 25.6             | 25.9             | 26.0             | 26.1             | 25.9             |
| Ontario                                | 36.3             | 36.0             | 36.0             | 35.8             | 36.1             | 36.2             |
| Prairies                               | 17.0             | 17.3             | 17.1             | 17.4             | 17.3             | 17.4             |
| BC                                     | 12.5             | 12.4             | 12.1             | 12.0             | 11.8             | 11.9             |
| <b>Outcome-related</b>                 |                  |                  |                  |                  |                  |                  |
| Ltd activity                           | 17.3             | 17.8             | 17.98            | 22.9             | 24.5             | 26.6             |
| Health status                          | 33.6             | 33.2             | 38               | 41.2             | 42.3             | 43.5             |
| 5+ Medical Doctor visits /year         | 24.2             | 26.3             | 26.64            | 27.6             | 28.3             | 26.8             |
| Pain                                   | 12.3             | 13.7             | 13.3             | 15.1             | 16.4             | 15.8             |
| Stress                                 | 26.3             | 29.2             | 25.09            | 27.3             | 28.3             | 27.4             |
| Depression                             | 6.1              | 5.8              | 6.43             | 6.9              | 7.1              | 6.0              |
| <b>Medication use in last 30 years</b> |                  |                  |                  |                  |                  |                  |
| Pain medication                        | 65.6             | 67.5             | 70.1             | 70.23            | 70.4             | 70.6             |
| Tranquilizer/ sedative                 | 5.1              | 5.3              | 6.8              | 8.12             | 8.2              | 10.0             |
| Antidepressants                        | 3.6              | 4.4              | 5.4              | 5.9              | 6.9              | 7.0              |

<sup>1</sup> wt%--Weighted percentages making rates representative of the Canadian population

<sup>2</sup> Number in study population

**Table 2: Percent of persons with ALI for which were impacted on medical attention and health care resource utilization by age and sex groups, NPHS, Canada, 1994-2006\***

| Year      |                                  | 2000<br>wt% <sup>1</sup> | 2002<br>wt% <sup>1</sup> | 2004<br>wt% <sup>1</sup> | 2006<br>wt% <sup>1</sup> |
|-----------|----------------------------------|--------------------------|--------------------------|--------------------------|--------------------------|
| All       | Number of ALI                    | 865                      | 932                      | 913                      | 1,005                    |
|           | None                             | 33.5                     | 40.1                     | 38.5                     | 40.7                     |
|           | Medical Doctor (MD) visits       | 29.8                     | 27.1                     | 27.3                     | 25.3                     |
|           | Emergency Department (ED) visits | 34.0                     | 28.5                     | 31.0                     | 28.8                     |
|           | Hospital admission in 48 hours   | 6.5                      | 5.4                      | 5.5                      | 4.9                      |
|           | Other                            | 2.7                      | 4.3                      | 3.1                      | 5.2                      |
|           | Any                              | 66.6                     | 60.0                     | 61.5                     | 59.3                     |
| Males     | Number of ALI                    | 394                      | 460                      | 463                      | 482                      |
|           | None                             | 34.8                     | 42.2                     | 41.6                     | 41.5                     |
|           | MD visits                        | 26.6                     | 26.5                     | 24.7                     | 23.6                     |
|           | ED visits                        | 34.5                     | 27.4                     | 30.8                     | 29.7                     |
|           | Hospital admission in 48 hours   | 9.5                      | 4.5                      | 4.6                      | 4.1                      |
|           | Other                            | 4.1                      | 4.0                      | 2.9                      | 5.3                      |
|           | Any                              | 65.2                     | 57.8                     | 58.4                     | 58.5                     |
| Females   | Number of ALI                    | 471                      | 472                      | 450                      | 523                      |
|           | None                             | 32.3                     | 37.6                     | 34.8                     | 39.7                     |
|           | MD visits                        | 32.6                     | 27.7                     | 30.5                     | 27.3                     |
|           | ED visits                        | 33.6                     | 29.9                     | 31.3                     | 27.8                     |
|           | Hospital admission in 48 hours   | 4.0                      | 6.4                      | 6.6                      | 5.7                      |
|           | Other                            | 1.5                      | 4.7                      | 3.4                      | 5.1                      |
|           | Any                              | 67.7                     | 62.4                     | 65.2                     | 60.2                     |
| Age 20-49 | Number of ALI                    | 588                      | 601                      | 564                      | 590                      |
|           | None                             | 34.2                     | 40.7                     | 39.7                     | 41.1                     |
|           | MD visits                        | 29.1                     | 27.7                     | 28.5                     | 24.3                     |
|           | ED visits                        | 34.3                     | 27.6                     | 28.7                     | 27.3                     |
|           | Hospital admission in 48 hours   | 6.2                      | 4.1                      | 2.9                      | 3.6                      |
|           | Other                            | 2.5                      | 4.1                      | 3.1                      | 7.3                      |
|           | Any                              | 65.8                     | 59.3                     | 3.2                      | 58.9                     |
| Age 50+   | Number of ALI                    | 277                      | 331                      | 349                      | 415                      |
|           | None                             | 31.8                     | 38.6                     | 36.6                     | 40.1                     |
|           | MD visits                        | 31.5                     | 25.8                     | 25.3                     | 26.9                     |
|           | ED visits                        | 33.6                     | 30.6                     | 34.9                     | 31.1                     |
|           | Hospital admission in 48 hours   | 7.3                      | 8.1                      | 9.9                      | 6.9                      |
|           | Other                            | 3.2                      | 4.9                      | 3.2                      | 1.9                      |
|           | Any                              | 61.4                     | 59.3                     | 63.5                     | 59.9                     |

\* Data on medical treatment was available only from 2000-2006

wt%<sup>1</sup> ---Weighted percentages making rates representative of the Canadian population

**Table 3: Percentages for ALI for which were impacted by activity limitation per year, NPHS, Canada, 2000-2006\***

| <b>Years</b>      |                        | <b>2000</b>            | <b>2002</b>            | <b>2004</b>            | <b>2006</b>            |
|-------------------|------------------------|------------------------|------------------------|------------------------|------------------------|
|                   | <b>Injury status</b>   | <b>wt%<sup>1</sup></b> | <b>wt%<sup>1</sup></b> | <b>wt%<sup>1</sup></b> | <b>wt%<sup>1</sup></b> |
| <b>All</b>        | None                   | 85.5                   | 84.0                   | 84.0                   | 82.2                   |
|                   | Activity limiting only | 10.8                   | 12.1                   | 11.6                   | 12.0                   |
|                   | Non-activity limiting  | 3.1                    | 3.0                    | 3.5                    | 5.1                    |
|                   | Both                   | 0.6                    | 0.4                    | 1.0                    | 0.8                    |
| <b>Males</b>      | None                   | 84.9                   | 82.0                   | 82.2                   | 80.1                   |
|                   | Activity limiting only | 10.5                   | 13.5                   | 13.2                   | 13.2                   |
|                   | Non-activity limiting  | 3.9                    | 3.9                    | 3.4                    | 5.6                    |
|                   | Both                   | 0.7                    | 0.7                    | 1.3                    | 1.1                    |
| <b>Females</b>    | None                   | 86.0                   | 85.8                   | 85.7                   | 84.1                   |
|                   | Activity limiting only | 11.1                   | 10.8                   | 10.1                   | 10.9                   |
|                   | Non-activity limiting  | 2.4                    | 3.0                    | 3.6                    | 4.6                    |
|                   | Both                   | 0.5                    | 0.4                    | 0.7                    | 0.5                    |
| <b>Ages 20-49</b> | None                   | 83.5                   | 81.7                   | 81.2                   | 79.3                   |
|                   | Activity limiting only | 12.2                   | 13.9                   | 13.3                   | 14.0                   |
|                   | Non-activity limiting  | 3.5                    | 3.7                    | 4.3                    | 5.8                    |
| <b>Ages 50+</b>   | None                   | 88.5                   | 87.2                   | 87.4                   | 85.3                   |
|                   | Activity limiting      | 8.6                    | 9.5                    | 9.5                    | 9.8                    |
|                   | Non-activity limiting  | 2.6                    | 3.1                    | 2.5                    | 4.2                    |
|                   | Both                   | 0.3                    | 0.3                    | 0.6                    | 0.6                    |

\* Data on medical treatment was available only from 2000-2006

<sup>1</sup> wt%--Weighted percentages making rates representative of the Canadian population

**Table 4: The pathology of ALI for which were impacted on patients' ED visits, admission and length of stay in hospital and consequence, NPHS, Canada, 1994-2006**

|                | Interview cycles           | 1996             | 1998             | 2000             | 2002             | 2004             | 2006             |
|----------------|----------------------------|------------------|------------------|------------------|------------------|------------------|------------------|
| N <sup>2</sup> | Number of ALI              | 755              | 786              | 865              | 931              | 911              | 1,006            |
|                | <b>Patterns of ALI</b>     | <sup>1</sup> wt% |
| ALL            | Brain, internal, multiple  | 4.9              | 3.3              | 5.8              | 3.2              | 3.9              | 4.3              |
|                | Fractures/dislocation      | 20.6             | 21.2             | 19.9             | 20.3             | 22.2             | 24.9             |
|                | Burns                      | 5.3              | 3.3              | 4.3              | 2.8              | 4.3              | 3.7              |
|                | Sprains, strains           | 42.0             | 42.3             | 42.4             | 47.3             | 42.8             | 42.2             |
|                | Cuts, punctures, bites     | 10.2             | 15.5             | 11.8             | 11.6             | 11.1             | 9.7              |
|                | Scrapes, bruises, blisters | 7.7              | 6.9              | 7.8              | 4.8              | 7.1              | 6.3              |
|                | Other                      | 9.3              | 7.5              | 8.0              | 10.0             | 8.6              | 8.9              |
|                | Total                      | 100.0            | 100.0            | 100.0            | 100.0            | 100.0            | 100.0            |
| Males          | Brain, internal, multiple  | 5.4              | 2.8              | 5.0              | 2.4              | 4.1              | 4.5              |
|                | Fractures/dislocation      | 21.3             | 21.5             | 21.5             | 20.3             | 21.0             | 26.1             |
|                | Burns                      | 5.8              | 2.4              | 3.9              | 3.5              | 4.6              | 2.7              |
|                | Sprains, strains           | 39.6             | 42.6             | 40.5             | 47.2             | 41.7             | 39.8             |
|                | Cuts, punctures, bites     | 12.2             | 17.4             | 16.7             | 13.9             | 13.6             | 13.1             |
|                | Scrapes, bruises, blisters | 6.2              | 5.2              | 5.7              | 4.4              | 6.2              | 5.8              |
|                | Other                      | 9.5              | 8.1              | 6.7              | 8.3              | 8.8              | 8.0              |
| Females        | Brain, internal, multiple  | 4.3              | 3.9              | 6.4              | 3.8              | 3.6              | 4.2              |
|                | Fractures/dislocation      | 19.8             | 21.0             | 18.5             | 21.6             | 23.6             | 23.3             |
|                | Burns                      | 4.5              | 4.1              | 4.7              | 3.6              | 4.0              | 4.8              |
|                | Sprains, strains           | 45.0             | 41.9             | 44.1             | 46.0             | 44.3             | 44.9             |
|                | Cuts, punctures, bites     | 7.8              | 13.3             | 7.7              | 9.1              | 7.9              | 6.0              |
|                | Scrapes, bruises, blisters | 9.5              | 8.9              | 9.5              | 6.4              | 8.2              | 7.0              |
|                | Other                      | 9.1              | 6.9              | 9.1              | 9.5              | 8.4              | 9.8              |
| Age 20-49      | Brain, internal, multiple  | 4.8              | 3.3              | 4.9              | 3.1              | 3.7              | 3.0              |
|                | Fractures/dislocation      | 17.4             | 19.8             | 22.5             | 17.4             | 18.2             | 22.9             |
|                | Burns                      | 5.5              | 3.3              | 4.1              | 3.5              | 5.0              | 4.8              |
|                | Sprains, strains           | 43.8             | 47.2             | 42.8             | 51.3             | 50.9             | 46.3             |
|                | Cuts, punctures, bites     | 10.9             | 15.5             | 11.5             | 10.7             | 9.4              | 9.4              |
|                | Scrapes, bruises, blisters | 8.5              | 5.0              | 7.5              | 4.5              | 4.4              | 4.6              |
|                | Other                      | 9.1              | 5.9              | 6.7              | 9.5              | 8.4              | 9.0              |
| Age 50+        | Brain, internal, multiple  | 5.4              | 3.4              | 7.6              | 3.4              | 4.2              | 6.3              |
|                | Fractures/dislocation      | 30.8             | 24.9             | 13.8             | 26.4             | 29.0             | 27.9             |
|                | Burns                      | 4.3              | 3.0              | 4.9              | 1.4              | 3.3              | 1.9              |
|                | Sprains, strains           | 36.2             | 30.2             | 41.7             | 39.0             | 29.1             | 35.8             |

|   |                            |      |      |      |      |      |      |
|---|----------------------------|------|------|------|------|------|------|
| 1 |                            |      |      |      |      |      |      |
| 2 |                            |      |      |      |      |      |      |
| 3 |                            |      |      |      |      |      |      |
| 4 |                            |      |      |      |      |      |      |
| 5 | Cuts, punctures, bites     | 8.1  | 15.2 | 12.5 | 13.4 | 13.7 | 10.3 |
| 6 | Scrapes, bruises, blisters | 5.1  | 11.7 | 8.5  | 5.4  | 11.7 | 9.1  |
| 7 | Other                      | 10.1 | 11.6 | 11.0 | 11.0 | 9.0  | 8.7  |
| 8 |                            |      |      |      |      |      |      |
| 9 |                            |      |      |      |      |      |      |

10 <sup>1</sup> wt%--Weighted percentages making rates representative of the Canadian population

11 <sup>2</sup> Number of ALI in study population

---

12  
13  
14  
15  
16  
17  
18  
19  
20  
21  
22  
23  
24  
25  
26  
27  
28  
29  
30  
31  
32  
33  
34  
35  
36  
37  
38  
39  
40  
41  
42  
43  
44  
45  
46  
47  
48  
49  
50  
51  
52  
53  
54  
55  
56  
57  
58  
59  
60

For peer review only

**Table 5: Odds ratios (OR) and 95% confidence interval (C.I.) of ALI for which were impacted by life style and socioeconomic status, adjusted for sex and age, NPHS, Canada, 1994-2006**

|                                         |                          | 1996        |           | 1998      |           | 2000      |           | 2002      |           | 2004      |           | 2006      |           |           |
|-----------------------------------------|--------------------------|-------------|-----------|-----------|-----------|-----------|-----------|-----------|-----------|-----------|-----------|-----------|-----------|-----------|
|                                         |                          | OR          | 95% C.I.  | OR        | 95% C.I.  | OR        | 95% C.I.  | OR        | 95% C.I.  | OR        | 95% C.I.  | OR        | 95% C.I.  |           |
| <b>Age groups</b>                       |                          |             |           |           |           |           |           |           |           |           |           |           |           |           |
|                                         | M/F                      | 1.4*        | 1.1 - 1.6 | 1.3*      | 1.1 - 1.6 | 0.9       | 0.8 - 1.1 | 1.3*      | 1.1 - 1.5 | 1.4*      | 1.2 - 1.6 | 1.3*      | 1.1 - 1.4 |           |
|                                         | 20-39                    | 2.1*        | 1.6 - 2.9 | 1.9*      | 1.5 - 2.4 | 1.8*      | 1.4 - 2.3 | 2.2*      | 1.8 - 2.7 | 1.8*      | 1.5 - 2.2 | 2.2*      | 1.8 - 2.6 |           |
|                                         | 40-59                    | 1.6*        | 1.1 - 2.1 | 1.4*      | 1.1 - 1.8 | 1.3       | 1.0 - 1.6 | 1.6*      | 1.3 - 2.0 | 1.3       | 1.0 - 1.5 | 1.5*      | 1.2 - 1.8 |           |
|                                         | 60+<br>(reference)       | 1.0         | ~         | 1.0       | ~         | 1.0       | ~         | 1.0       | ~         | 1.0       | ~         | 1.0       | ~         |           |
| <b>Background variables<sup>2</sup></b> |                          |             |           |           |           |           |           |           |           |           |           |           |           |           |
|                                         | Married/<br>Common-law   | yes/no      | 1.0       | 0.8 - 1.2 | 1.0       | 0.8 - 1.2 | 1.0       | 0.8 - 1.2 | 1.0       | 0.9 - 1.2 | 0.9       | 0.7 - 1.0 | 0.9       | 0.8 - 1.0 |
|                                         | income                   | low/high    | 1.1       | 0.9 - 1.3 | 1.0       | 0.9 - 1.3 | 1.2       | 1.0 - 1.4 | 0.9       | 0.8 - 1.1 | 1.1       | 0.9 - 1.3 | 1.2       | 1.0 - 1.4 |
|                                         | Completed<br>High School | yes/no      | 1.2       | 1.0 - 1.5 | 1.1       | 0.9 - 1.3 | 1.0       | 0.8 - 1.2 | 0.9       | 0.8 - 1.1 | 0.9       | 0.7 - 1.0 | 1.1       | 0.9 - 1.3 |
|                                         | Rural                    | yes/no      | 1.1       | 0.9 - 1.4 | 1.1       | 0.9 - 1.3 | 0.9       | 0.7 - 1.1 | 1.1       | 0.9 - 1.3 | 0.8       | 0.7 - 1.0 | 1.0       | 0.8 - 1.1 |
|                                         | Non-English<br>Immigrant | yes/no      | 0.9       | 0.7 - 1.1 | 0.9       | 0.7 - 1.0 | 0.8       | 0.7 - 1.0 | 0.8       | 0.7 - 1.0 | 0.7       | 0.6 - 0.9 | 0.8       | 0.7 - 0.9 |
|                                         |                          | yes/no      | 0.6       | 0.5 - 0.8 | 0.7       | 0.6 - 0.9 | 0.8       | 0.6 - 1.0 | 0.8       | 0.6 - 1.0 | 0.7       | 0.5 - 0.8 | 0.7       | 0.6 - 0.9 |
| <b>Health related<sup>3</sup></b>       |                          |             |           |           |           |           |           |           |           |           |           |           |           |           |
|                                         | Current<br>smoking       | yes/no      | 1.1       | 0.9 - 1.4 | 1.1       | 0.9 - 1.3 | 1.2       | 1.0 - 1.5 | 1.2       | 1.0 - 1.5 | 0.9       | 0.8 - 1.1 | 0.9       | 0.7 - 1.1 |
|                                         | Physical<br>inactivity   | yes/no      | 0.8       | 0.7 - 0.9 | 0.8       | 0.7 - 0.9 | 0.8       | 0.6 - 0.9 | 0.9       | 0.8 - 1.1 | 0.8       | 0.7 - 0.9 | 0.8       | 0.7 - 0.9 |
|                                         | Obese                    | yes/no      | 1.2       | 1.0 - 1.5 | 1.2       | 1.0 - 1.5 | 1.1       | 0.9 - 1.3 | 1.0       | 0.9 - 1.2 | 1.1       | 0.9 - 1.3 | 1.0       | 0.8 - 1.1 |
|                                         | Alcohol<br>drink /week   | 9+/less     | 1.2       | 0.9 - 1.5 | 1.2       | 1.0 - 1.6 | 1.3       | 1.0 - 1.7 | 1.4*      | 1.2 - 1.8 | 1.2       | 1.0 - 1.5 | 1.5*      | 1.3 - 1.8 |
|                                         | Alcohol 5+ at<br>a time  | weekly/less | 1.3       | 1.0 - 1.5 | 1.4*      | 1.2 - 1.7 | 1.4*      | 1.2 - 1.7 | 1.2       | 1.0 - 1.5 | 1.3*      | 1.1 - 1.5 | 1.3*      | 1.1 - 1.5 |

51. For sex group, females are the reference group

52. For background variables comparison groups, the second listed group for binary variables is the reference group

53. For health-related comparison groups, the second listed group for binary variables is the reference group

54\* Means that there are statistically significant difference compared with control groups



**Table 6: Persons with ALI for which were impacted on life style, socioeconomic status, and health care utilization before and after the injury, NPHS, Canada, 1994-2006**

|                                                                                  |          | Before | During | After | p value* |        |        | N**   |
|----------------------------------------------------------------------------------|----------|--------|--------|-------|----------|--------|--------|-------|
|                                                                                  |          | %      | %      | %     | A vs B   | B vs C | A vs C |       |
|                                                                                  |          | A      | B      | C     |          |        |        |       |
| <b>Risky behaviours and socioeconomic status</b>                                 |          |        |        |       |          |        |        |       |
| Income                                                                           | low      | 36.3   | 32.1   | 28.5  | <0.001   | <0.001 | <0.001 | 2,892 |
| Obese                                                                            | obese    | 17.8   | 19.7   | 22.4  | 0.005    | <0.001 | <0.001 | 1,780 |
| Physical activity                                                                | inactive | 50.4   | 47.1   | 48.1  | 0.001    | 0.197  | 0.343  | 3,044 |
| Smoking                                                                          | current  | 19.0   | 18.5   | 18.2  | 0.265    | 0.384  | 0.077  | 1,693 |
| Alcohol drinking                                                                 | 9+/wk    | 9.6    | 10.7   | 11.2  | 0.048    | 0.535  | 0.349  | 3,548 |
| <b>Health-related issues</b>                                                     |          |        |        |       |          |        |        |       |
| Limited activity                                                                 | yes      | 18.7   | 25.5   | 26.3  | <0.001   | 0.221  | <0.001 | 3,657 |
| Health status                                                                    | poor     | 33.1   | 36.3   | 39.6  | <0.001   | <0.001 | <0.001 | 3,653 |
| Medical Doctor                                                                   |          |        |        |       |          |        |        |       |
| visits                                                                           | 5+/year  | 26.5   | 34.0   | 29.8  | <0.001   | <0.001 | <0.001 | 3,616 |
| Pain                                                                             | yes      | 13.7   | 16.8   | 17.3  | <0.001   | 0.432  | <0.001 | 3,657 |
| Stress                                                                           | yes      | 29.7   | 31.3   | 29.4  | 0.104    | 0.050  | 0.757  | 2,967 |
| <b>Medication use in past 30 days before interview</b>                           |          |        |        |       |          |        |        |       |
| Pain medication                                                                  | yes      | 61.9   | 70.2   | 70.8  | <0.001   | 0.489  | <0.001 | 3,640 |
| Sedatives                                                                        |          |        |        |       |          |        |        |       |
| /tranquiliser                                                                    | yes      | 5.7    | 7.2    | 8.1   | 0.001    | 0.055  | <0.001 | 3,639 |
| Antidepressants                                                                  | yes      | 4.2    | 5.9    | 6.2   | <0.001   | 0.346  | 0.403  | 3,641 |
| *P value calculated by McNemar's test                                            |          |        |        |       |          |        |        |       |
| ** N of persons making up the matched analysis for the before and after analysis |          |        |        |       |          |        |        |       |

STROBE 2007 (v4) Statement—Checklist of items that should be included in reports of cohort studies

| Section/Topic             | Item # | Recommendation                                                                                                                                                                       | Reported on page # |
|---------------------------|--------|--------------------------------------------------------------------------------------------------------------------------------------------------------------------------------------|--------------------|
| Title and abstract        | 1      | (a) Indicate the study’s design with a commonly used term in the title or the abstract                                                                                               | Page 1, 2          |
|                           |        | (b) Provide in the abstract an informative and balanced summary of what was done and what was found                                                                                  | Page 2, 3          |
| <b>Introduction</b>       |        |                                                                                                                                                                                      | <b>Page 4</b>      |
| Background/rationale      | 2      | Explain the scientific background and rationale for the investigation being reported                                                                                                 | Page 4             |
| Objectives                | 3      | State specific objectives, including any prespecified hypotheses                                                                                                                     | Page 4             |
| <b>Methods</b>            |        |                                                                                                                                                                                      | <b>Page 5</b>      |
| Study design              | 4      | Present key elements of study design early in the paper                                                                                                                              | Page 5             |
| Setting                   | 5      | Describe the setting, locations, and relevant dates, including periods of recruitment, exposure, follow-up, and data collection                                                      | Page 5, 6          |
| Participants              | 6      | (a) Give the eligibility criteria, and the sources and methods of selection of participants. Describe methods of follow-up                                                           | Page 5, 6          |
|                           |        | (b) For matched studies, give matching criteria and number of exposed and unexposed                                                                                                  | Page 5, 6          |
| Variables                 | 7      | Clearly define all outcomes, exposures, predictors, potential confounders, and effect modifiers. Give diagnostic criteria, if applicable                                             | Page 7             |
| Data sources/ measurement | 8*     | For each variable of interest, give sources of data and details of methods of assessment (measurement). Describe comparability of assessment methods if there is more than one group | Page 7             |
| Bias                      | 9      | Describe any efforts to address potential sources of bias                                                                                                                            | Page 7             |
| Study size                | 10     | Explain how the study size was arrived at                                                                                                                                            | Page 7             |
| Quantitative variables    | 11     | Explain how quantitative variables were handled in the analyses. If applicable, describe which groupings were chosen and why                                                         | Page 7, 8          |
| Statistical methods       | 12     | (a) Describe all statistical methods, including those used to control for confounding                                                                                                | Page 7, 8          |
|                           |        | (b) Describe any methods used to examine subgroups and interactions                                                                                                                  | Page 7, 8          |
|                           |        | (c) Explain how missing data were addressed                                                                                                                                          | Page 7, 8          |
|                           |        | (d) If applicable, explain how loss to follow-up was addressed                                                                                                                       | Page 7, 8          |
|                           |        | (e) Describe any sensitivity analyses                                                                                                                                                | Page 7, 8          |
| <b>Results</b>            |        |                                                                                                                                                                                      | <b>Page 8</b>      |

|                          |     |                                                                                                                                                                                                                                                                                                                                                                                                               |                                     |
|--------------------------|-----|---------------------------------------------------------------------------------------------------------------------------------------------------------------------------------------------------------------------------------------------------------------------------------------------------------------------------------------------------------------------------------------------------------------|-------------------------------------|
| Participants             | 13* | (a) Report numbers of individuals at each stage of study—eg numbers potentially eligible, examined for eligibility, confirmed eligible, included in the study, completing follow-up, and analysed<br>(b) Give reasons for non-participation at each stage<br>(c) Consider use of a flow diagram                                                                                                               |                                     |
| Descriptive data         | 14* | (a) Give characteristics of study participants (eg demographic, clinical, social) and information on exposures and potential confounders<br>(b) Indicate number of participants with missing data for each variable of interest<br>(c) Summarise follow-up time (eg, average and total amount)                                                                                                                | Page 5, 6<br>Page 5, 6<br>Page 5, 6 |
| Outcome data             | 15* | Report numbers of outcome events or summary measures over time                                                                                                                                                                                                                                                                                                                                                |                                     |
| Main results             | 16  | (a) Give unadjusted estimates and, if applicable, confounder-adjusted estimates and their precision (eg, 95% confidence interval). Make clear which confounders were adjusted for and why they were included<br>(b) Report category boundaries when continuous variables were categorized<br>(c) If relevant, consider translating estimates of relative risk into absolute risk for a meaningful time period | Page 8, 9                           |
| Other analyses           | 17  | Report other analyses done—eg analyses of subgroups and interactions, and sensitivity analyses                                                                                                                                                                                                                                                                                                                |                                     |
| <b>Discussion</b>        |     |                                                                                                                                                                                                                                                                                                                                                                                                               | Page 9-13                           |
| Key results              | 18  | Summarise key results with reference to study objectives                                                                                                                                                                                                                                                                                                                                                      | Page 9, 10, 11                      |
| <b>Limitations</b>       |     |                                                                                                                                                                                                                                                                                                                                                                                                               | Page 12                             |
| Interpretation           | 20  | Give a cautious overall interpretation of results considering objectives, limitations, multiplicity of analyses, results from similar studies, and other relevant evidence                                                                                                                                                                                                                                    | Page 9-13                           |
| Generalisability         | 21  | Discuss the generalisability (external validity) of the study results                                                                                                                                                                                                                                                                                                                                         |                                     |
| <b>Other information</b> |     |                                                                                                                                                                                                                                                                                                                                                                                                               |                                     |
| Funding                  | 22  | Give the source of funding and the role of the funders for the present study and, if applicable, for the original study on which the present article is based                                                                                                                                                                                                                                                 | Page 3                              |

\*Give information separately for cases and controls in case-control studies and, if applicable, for exposed and unexposed groups in cohort and cross-sectional studies.

**Note:** An Explanation and Elaboration article discusses each checklist item and gives methodological background and published examples of transparent reporting. The STROBE checklist is best used in conjunction with this article (freely available on the Web sites of PLoS Medicine at <http://www.plosmedicine.org/>, Annals of Internal Medicine at <http://www.annals.org/>, and Epidemiology at <http://www.epidem.com/>). Information on the STROBE Initiative is available at [www.strobe-statement.org](http://www.strobe-statement.org).



**Impact of Activity-Limiting Injuries based on the Canadian National Population Health Survey 1994-2006**

|                                 |                                                                                                                                                                                                                                                                                                                                                                                                                                                                                                                                                                                       |
|---------------------------------|---------------------------------------------------------------------------------------------------------------------------------------------------------------------------------------------------------------------------------------------------------------------------------------------------------------------------------------------------------------------------------------------------------------------------------------------------------------------------------------------------------------------------------------------------------------------------------------|
| Journal:                        | <i>BMJ Open</i>                                                                                                                                                                                                                                                                                                                                                                                                                                                                                                                                                                       |
| Manuscript ID:                  | bmjopen-2012-002052.R1                                                                                                                                                                                                                                                                                                                                                                                                                                                                                                                                                                |
| Article Type:                   | Research                                                                                                                                                                                                                                                                                                                                                                                                                                                                                                                                                                              |
| Date Submitted by the Author:   | 21-Dec-2012                                                                                                                                                                                                                                                                                                                                                                                                                                                                                                                                                                           |
| Complete List of Authors:       | Mo, Frank; Centre for Chronic Disease Prevention and Control, Public Health Agency of Canada<br>Neutel, Ineke; Department of Epidemiology, University of Ottawa<br>Morrison, Howard; Centre for Chronic Disease Prevention and Control, Public Health Agency of Canada<br>Hopkins, Doug; Centre for Chronic Disease Prevention and Control, Public Health Agency of Canada<br>Da Silva, Caroline; Centre for Chronic Disease Prevention and Control, Public Health Agency of Canada<br>Jiang, Ying; Centre for Chronic Disease Prevention and Control, Public Health Agency of Canada |
| <b>Primary Subject Heading</b>: | Qualitative research                                                                                                                                                                                                                                                                                                                                                                                                                                                                                                                                                                  |
| Secondary Subject Heading:      | Epidemiology, Public health, Research methods                                                                                                                                                                                                                                                                                                                                                                                                                                                                                                                                         |
| Keywords:                       | EPIDEMIOLOGY, PUBLIC HEALTH, Health & safety < HEALTH SERVICES ADMINISTRATION & MANAGEMENT, Quality in health care < HEALTH SERVICES ADMINISTRATION & MANAGEMENT                                                                                                                                                                                                                                                                                                                                                                                                                      |
|                                 |                                                                                                                                                                                                                                                                                                                                                                                                                                                                                                                                                                                       |

SCHOLARONE™  
Manuscripts

1  
2  
3  
4 **Impact of Activity-Limiting Injuries based on the Canadian National Population Health Survey**  
5 **1994-2006**  
6  
7

8 Frank Mo<sup>1</sup>, PhD; Ineke Neutel<sup>2</sup>, PhD; Howard Morrison, PhD; Doug Hopkins, BA; Caroline Da Silva,  
9 BSc; Ying Jiang<sup>1</sup>, MSc  
10  
11

12 **Author references:**  
13

---

14  
15 <sup>1</sup>Consumer Product Safety and Injury Risk Assessment Program Working Group  
16 Science Integration Division  
17 Centre for Chronic Disease Prevention and Control  
18 Public Health Agency of Canada  
19  
20

21 <sup>2</sup>Department of Epidemiology and Community Medicine, Faculty of Medicine, University of Ottawa  
22  
23  
24  
25  
26  
27  
28  
29

30 **KEYWORDS** Activity limiting injury; impact factors, longitudinal health survey; epidemiology;  
31 injury prevention; Canada.  
32  
33  
34

35 **Correspondence to**  
36

37  
38 Dr. Frank Mo, Science Integration Division  
39 Centre for Chronic Disease Prevention and Control  
40 Public Health Agency of Canada  
41 Frank.Mo@phac-aspc.gc.ca.  
42  
43  
44

45 **Running title:** Impact of Activity-Limiting Injury trends  
46

47 **Word count:**

48 Abstract: 300  
49 Manuscript: 3,496  
50  
51  
52  
53  
54  
55  
56  
57  
58  
59  
60

## ABSTRACT

**Objective:** To examine the prevalence and factors affecting activity-limiting injuries (ALI) on individuals and on the Canadian population; to estimate the short and long term impact on health status and well-being due to ALI in Canada from 1994 to 2006 using the Canadian National Population Health Survey (NPHS).

**Design:** The NPHS is a randomised longitudinal cohort study with biennial interviews, with information on age, sex, education, marital status, income, residence, height and weight to self-perceived health status, health care utilization and medication use in addition to ALI.

**Setting:** The study population was a random sample of male and female participants 20 years and older from ten provinces and three territories in Canada.

**Primary and secondary outcome measures:** Logistic regression models were used to assess the potential impact of ALI on individuals and on the Canadian population. The interviews two years before and two years after the ALI were compared to examine long-term effects, and the McNemar test option in SAS was used for the matched analysis.

**Results:** The immediate impacts of ALI were pain, disability, and disruption of regular life. Long-term effects in patients were chronic pain and increased medical doctor visits. Population impact included a considerable increase in health care access and cost. The odds ratios (ORs) for the 20-39 age group compared to those 60+ was OR, 2.2; 95% CI, 1.8-2.7, while the OR associated with being male was 1.4; 95% CI, 1.1-1.6. Individuals consuming nine or more alcoholic drinks per week were also significantly more likely to report an ALI (OR, 1.5; 95% CI, 1.3-1.8).

**Conclusion:** The findings from this study illustrated the immediate and long term impact of individuals and population level injuries in Canada. Injury control policies should aim to prevent the both the number of injuries fatalities as well as the consequences among survivors.

### Summary Boxes:

What is already known on this subject?

1. Activity-limiting injuries (ALI) burden such as increased steadily prevalence, mortality and economic costs in Canada;
2. Showing increasing trends in obesity, limited activity, poor health status, medication use related to ALI;
3. Nature and types related to ALI;

What does this study add?

1. Potential associations between health care utilization and ALI before and after injury;
2. Hospital admission, Department emergency and medical doctors visits impacted on ALI;

3. The immediate individuals impact such as pain, disability, disruption of regular life. Long-term effects in patients were sequelae, chronic pain, and increased medical doctor visits after ALI. Population impact included loss of productivity and a considerable increase in health care access and cost.
4. policies should aim to prevent both the number of injuries fatalities as well as the consequences among survivors.

**Competing Interest:**

None to declare.

**Funding Statement:**

This research received no specific grant from any funding agency in the public, commercial or not-for-profit sectors.

**Contributorship Statement:**

Dr. Frank Mo, leader of the research project, and play the major role in research design, drafted the article and critical review, and advising for data analysis and results interpretation.

Dr. Ineke C. Neutel, contributed to data analysis, assisted in research design and data analysis, interpretation, and the report.

Dr. Howard Morrison, contributed to research consultation, provided critical review comments, and advising for data analysis and revised critically the article.

Mr. Doug Hopkins, assisted in research design, provided literature review and critical comments and signed final version of the manuscript.

Ms. Caroline Da Silva, participated in research design, provided critical review comments and signed final version of the manuscript.

Ms. Ying Jiang, contributed to research design, provided literature and critical review comments, and signed final version of the manuscript for submission.

## INTRODUCTION

Injuries are a serious public health issue with a major impact on the lives of Canadians. They are leading causes of death and hospitalization, as well as of disability, loss of productivity and potential years of life lost (PYLL) [1-4]. Sequelae from injuries include activity limitation, functional disability and pain which in turn influence a variety of social, psychological, labour force, and economic factors [5-8]. An analysis of emergency department (ED) visits and hospitalisation admissions for Ontario noted that one in four ED visits were injury-related, as were one in every 17 hospitalisations [9]. These data accentuated the importance of injuries to the health care system. Other studies have demonstrated the increasing medical doctor (MD) contacts, the use more medications for pain, more days in hospital, and more hours of home care services [9-11].

Several studies of traumatic disability have also focused on injuries resulting in hospitalization [12], types of injury [13-14], and serious head injuries [15]. One study reported that half of patients had some limitation in activity for two days or more due to injury, and patients treated in the clinic were somewhat more likely to have two or more days of limited activity than were patients treated in the ED [16].

Injuries are not only largely preventable, but the impact of injuries can usually be lessened. To develop effective policies leading to the prevention of injuries and to reduce the impact of injuries on society, information is needed about the influenced effects that individuals with injuries treated in the primary care setting and not requiring hospitalization frequently result in significant functional



1  
2  
3  
4 impairment and to identify those injuries which, by virtue of their contribution to disability, would be  
5  
6 targets for prevention programs.  
7  
8  
9

10  
11 The objectives of this study are to explore the immediate and longer term consequences of injury  
12 including physical, psychological, social and occupational functioning. This comprises a longitudinal  
13 population health study, which will measure the impact of injuries on individual's and population level  
14 health status and well-being due to activity-limiting injuries (ALI) in the NPHS from 1994 to 2006 in  
15  
16  
17  
18  
19  
20  
21 Canada.  
22  
23  
24

## 25 26 **METHODOLOGY**

### 27 28 **Study population**

29  
30 The source population for this study was the Canadian National Population Health Survey  
31 (NPHS), from 1994/1995 (cycle 1) to 2006/2007 (cycle 7). The study population was designed to be  
32 representative of the Canadian population with the exception of persons living on Indian reserves or on  
33 Canadian Forces bases [9, 11]. The sample design was a multiple cluster [17], ideal for controlling costs  
34 when personal interviews are needed, as was the case for cycle 1 of the NPHS. To cover as much as  
35 possible of the Canadian population, separate components of the survey were also carried out in the  
36 Territories and in health care institutions. In the Territories, a simpler stratified design was used. As  
37 well, anticipating the creation of Nunavut, separate strata were formed for each of the future territories,  
38 Nunavut and NWT [17]. The sampling frame for the first cycle (1994/5) originated with the Canadian  
39 Labour Force Survey (CLFS), a multi-stage, stratified sampling technique used for all provinces except  
40 Quebec for which a provincial sampling frame was used [17]. From the 2000 cycle onward, additional  
41  
42  
43  
44  
45  
46  
47  
48  
49  
50  
51  
52  
53  
54  
55  
56  
57  
58  
59  
60

1  
2  
3  
4 questions were added to the questionnaire, such as more detailed questions on health care use after the  
5  
6 ALI, with the result that some analyses are restricted to data from 2000 to 2006  
7  
8  
9

10  
11 Nearly all respondents were re-interviewed biennially by telephone except for individuals  
12  
13 without a telephone, for whom face to face interviews were used. Interviewers were instructed to follow  
14  
15 all reasonable strategies to trace people. Response rates were 83.6% for cycle one, 92.8% for cycle two,  
16  
17 88.3% for cycle three, 84.9% for cycle four, 80.8% for cycle five, 77.6% for cycle six and 77.0% for  
18  
19 cycle seven.  
20  
21  
22

23  
24  
25 To look at ADIs resulting from new injuries, data for cycles from 1996 to 2006 were used; data  
26  
27 for 1994 was only used for the “before and after” analysis (Table 6). Data were used from respondents  
28  
29 who were willing to share their data for data analysis, who completed all interviews to date, and who  
30  
31 achieved the age of 20 before 2006. Since the source population, i.e. the total NPHS population,  
32  
33 covered more ages than the population analysed for this study, it was possible to add younger persons  
34  
35 from the source population to our study population after the cycle at which they reached age of 20 years  
36  
37 old. Consequently, the study population changed somewhat over the years of the study allowing  
38  
39 comparable cross-sectional analysis of populations with the same age range and age distribution.  
40  
41  
42  
43  
44

## 45 46 47 **Variables**

48  
49 The interview ranged from background questions (age, sex, education, marital status, income,  
50  
51 residence, height and weight) to health-related questions (self-perceived health status, health care  
52  
53 utilization and medication use). Body mass index (BMI) was calculated as weight in kilograms divided  
54  
55  
56  
57  
58

1  
2  
3  
4 by height in meters squared [18]. A BMI of 30 or over was considered obese. Respondents were asked  
5  
6  
7 to rate their health as one of five categories: excellent, very good, good, fair or poor and for this study,  
8  
9 the lower two categories were combined as poorer health and the top three as good health. Depression  
10  
11 and stress were measured by the following questions: “have you had 2 weeks in a row during the past 12  
13  
14 months when you were sad, blue, or depressed?” and “During the past month, about how often did you  
15  
16 feel: ... so sad that nothing could cheer you up? ... nervous? ... restless or fidgety? ... hopeless?...  
17  
18 worthless?”. A question about number of visits to any type of physician or medical specialist in the past  
19  
20 year was dichotomized as: “five or more visits, versus fewer than five visits”. Alcohol consumption was  
21  
22 based on a series of question on the number of drinks consumed each day of the past seven days before  
23  
24 the interview. For this study, this was expressed as drinking nine or more drinks per week, versus  
25  
26 drinking eight or less. In this study, “alcohol used 5+ at a time” was defined as "How often in the past  
27  
28 week have you had 5 or more drinks on one occasion?". The variable “hospital treatment” was  
29  
30 described as "Did you receive any medical attention for this injury from a health professional within 48  
31  
32 hours?" For example, doctor, hospital emergency room. Quartiles of total household income were  
33  
34 calculated for the study population, with the lower two quartiles combined for the low income category  
35  
36 to be compared to the top two as the high income category. A Physical activity index was calculated  
37  
38 based on kilocalories per kilogram of body weight per day expended (KKD). Physically active was  
39  
40 defined as energy expenditure of at least 3 KKD; and physically inactive was defined as less than 1.5  
41  
42 KKD. Medication use was elicited by the question: “In the past 30 days, did you take . . . ?” This was  
43  
44 followed by a series of questions, such as “Did you take antidepressants and or anti-stressants?” “Did  
45  
46 you take anything for pain?” A 'no' answer to the question "Are you usually free of pain and  
47  
48 discomfort?" was taken as indication that the respondent often suffered pain.  
49  
50  
51  
52  
53  
54  
55  
56  
57  
58  
59  
60

1  
2  
3  
4 The definition of injury in the NPHS data was “In the past 12 months, did you have any injuries  
5 serious enough to limit your normal activities?” If more than one injury, the following questions were to  
6 refer to the most serious one. A separate question asked respondents a general question about  
7 limitations in activity, “Because of a long-term physical or mental condition or a health problem, have  
8 you limited in the kind or amount of activity you could do: at home? at school? at work? in other  
9 activities?”. Otherwise, they should be defined as non-activity limiting.  
10  
11  
12  
13  
14  
15  
16  
17  
18  
19  
20

## 21 **Data Analysis**

22  
23 For the statistical analysis, SAS version 9.2 (SAS Institute, Cary, NC, USA) was used. Logistic  
24 regression was used to calculate odds ratios (OR) with the presence/absence of ALI as the dependent  
25 variable, adjusted for age (in single years) and sex. Since the data were collected as a statistical sample  
26 of the Canadian population, the ‘weight’ option was used in all SAS statistical analyses to make the  
27 results representative of the Canadian population from 1994 to 2006 in seven cycles of cross-sectional  
28 studies. Weights were provided by Statistics Canada according to their sampling procedures. In order to  
29 produce a meaningful estimate of the variance for the weighted results, the weights were adjusted using  
30 the formula: [average weight = (sample weight/sum of the sample weights) \* sample size].  
31  
32  
33  
34  
35  
36  
37  
38  
39  
40  
41

42 In order to determine the characteristics, life style and health status, medical attention and health  
43 care utilization as well as activity limitation and disability, which were impacted by ALI, all new injury  
44 cases, i.e., those who had not reported an injury in the previous interview were identified. For each new  
45 case, data from three cycles were selected, 1) the cycle before reporting, 2) the cycle of reporting, 3) the  
46 cycle after reporting. Data for the 1994 cycle were used only in this ‘before and after’ analysis. Only  
47 the first recorded ALI report per person was included. The McNemar test option in SAS was used for  
48  
49  
50  
51  
52  
53  
54  
55  
56  
57  
58  
59  
60

1  
2  
3  
4  
5  
6  
7  
8  
9  
10  
11  
12  
13  
14  
15  
16  
17  
18  
19  
20  
21  
22  
23  
24  
25  
26  
27  
28  
29  
30  
31  
32  
33  
34  
35  
36  
37  
38  
39  
40  
41  
42  
43  
44  
45  
46  
47  
48  
49  
50  
51  
52  
53  
54  
55  
56  
57  
58  
59  
60

matched analysis. This study approved by the research ethics committee of Health Canada.

## RESULTS

The numbers of ALI in the study population increased from 755 cases in 1996 to 1,006 in 2006. The weighted prevalence of all ALI increased steadily from 10.5% in 1996 to 12.8% in 2006. Those reporting ALI showed increasing trends in obesity, limited activity, poor health status, medication use, and potential injury sequelae, such as pain, stress and depression but declining trends in lower income and current smoking (**Table 1**). The proportion of injuries which resulted in activity limitations were higher for males, and increased more over time than for females (**Table 2**). Furthermore, younger adults (20-49 yrs.) were more likely to report activity limiting injuries (12.2% to 14.0%) compared to older (50+ yrs.) adults (8.6% to 9.8%). Among respondents who reported a ALI, the weighted percentages who reported five or more visits to a medical doctor (MD) within the previous year decreased from 29.8% in 2000 to 25.3% in 2006, emergency department (ED) visits went from 34.0% to 28.8%, and hospital admission within 48 hours after the injury went from 6.5% to 4.9% (**Table 3**). The rate of hospital admissions within 48 hours for adults aged 50+ years was higher than that of young aged (20-49) group.

The most frequently reported injuries resulting in activity limitation were sprains and strains (42%), followed by fractures and dislocations (20%), and cuts, punctures and bites (10%) (**Table 4**). Only 3.3 to 5.0% of ALIs were in the category of brain, internal and multiple injuries. Men tended to have more cuts, punctures and bites while women had more scrapes, bruises and blisters. Younger ages tended to have more sprains and strains and older ages more fractures and dislocations.

1  
2  
3  
4  
5 Logistic regression analysis indicated that younger age groups and male participants were more  
6  
7 impacted by ALI. Only a few of the other variables showed associations with ALI - immigrants had  
8  
9 consistently lower rates of ALI, while people consumed nine or more alcoholic drinks per week had  
10  
11 significantly higher rates (**Table 5**).

12  
13  
14  
15  
16 Attributes of persons with an ALI were compared in the cycles before and after their injury  
17  
18 (**Table 6**). Most behavioural risk factors examined showed a pattern of an increase from the two years  
19  
20 previous to the ALI to the time of the ALI to a further increase the two years after the ALI. A similar  
21  
22 pattern was observed for health status and interactions with the health care system. (**Table 6**).

## 23 24 25 26 27 28 **DISCUSSION**

29  
30 Based on NPHS data, more than 10% of the adult Canadian population annually experience an  
31  
32 ALI, with the proportion increasing from 10.5% in 1996 to 12.8% in 2006. According to the definition  
33  
34 of ALI as activity-limiting injuries, all people with ALI experienced a certain amount of disruption of  
35  
36 their daily activities with the impact varying according to the type and severity of their injury and  
37  
38 depending on their customary type of activity [19-22]. About 20% of ALIs were fractures and  
39  
40 dislocations, many of whom necessitated a period of altered activity. Older people were more likely to  
41  
42 report fractures than the younger age groups. The most common injuries were sprains and strains, the  
43  
44 impact of which also varied a great deal depending on type and severity [23-24]. An important impact  
45  
46 of injuries is on the workplace through absenteeism and on the family through the disruption of  
47  
48 customary activities [25-26]. Besides the impact of injuries on every day activities, there was also the  
49  
50 impact on the health care system [27]. In our data, in 2000, about two thirds of people with ALI sought  
51  
52  
53  
54  
55  
56  
57  
58  
59  
60

1  
2  
3  
4 some kind of medical care. Evidence was presented showing that the impact of ALI might be even more  
5  
6 far-reaching, as seen by the higher levels of medical care, and continued pain remaining two years after  
7  
8 the ALI were reported.  
9  
10

11  
12  
13  
14 Other research on injuries has used a variety of definition of injuries, based on different sources  
15  
16 of information. Questions in the NPHS were able to put these other measures in perspective. For  
17  
18 example, some studies used hospital-based data [28], but the present study showed that only about 5% of  
19  
20 ALI were resulted in a hospital admission within the first 48 hours after the event. Assuming that all  
21  
22 injuries that required hospitalization were within the activity-limiting rubric, it is clear that studies using  
23  
24 only hospital data would include only a small portion of important injuries [29]. However, the  
25  
26 hospitalized injuries will be the more severe injuries which are responsible for a disproportional share of  
27  
28 the health care cost and disability [25]. Other studies have used ED visits as a unit of measurement [9].  
29  
30 The present study showed less than one third of ALI went to an ED to obtain treatment. Again, the latter  
31  
32 were the more severe injuries or those needing specialized treatment, e.g., casts on fractures, and thus  
33  
34 had a greater impact on daily life and cost. Another source of data commonly used has been mortality  
35  
36 data. Although deaths are definitely activity-limiting, obviously, none were included in this study. Fatal  
37  
38 injuries reflect a different range of injuries than those for ALI. For example, in an US study, firearm-  
39  
40 related injuries were 22% of all injury deaths, second only to traffic accident related injuries, but  
41  
42 firearms amounted to less than 1% for non-fatal injuries [11]. Thus, different measuring units for  
43  
44 measuring injury rates will target different slices of the spectrum of injuries and provide different results.  
45  
46  
47  
48  
49  
50  
51  
52 ALI are of special public health importance, but are not sufficiently studied.  
53  
54  
55  
56  
57  
58  
59  
60

1  
2  
3  
4  
5 Another level of impact resulting from ALI would consist of impact on the health care system.  
6  
7 Approximately 60% of people with ALI obtained medical care of some type. Of these, approximately  
8  
9 one third of persons with ALI went to ED to experience the often long wait before receiving treatment.  
10  
11 Back at home the patient would not only experience the pain and disability of the ALI, but also the need  
12  
13 to negotiate the health care system, such as making appointments with physicians, specialists,  
14  
15 physiotherapists, etc., finding transportation, often needing someone to accompany them [30-33]. Even  
16  
17 though the proportion of the population with ALI increased over the years 2000-2006, decreases were  
18  
19 seen in use of primary care and the hospital ED visits as well as hospitalisation. This decrease in health  
20  
21 care use could be an indication either of greater difficulty in accessing health care, or that the nature of  
22  
23 ALIs has moderated over the years. Berdahl found variation by ethnic group and sex, both in the  
24  
25 reporting of work-related injuries and in the seeking of medical care and the change in ethnic  
26  
27 composition over the years could also be a factor in the NPHS data [34-36]. In any case, ALI are  
28  
29 suffered by a large proportion of the population annually, and a majority of these seek medical treatment  
30  
31 whether primary care, ED or hospital care. Clearly, this entails a large cost to the health care system and  
32  
33 any prevention would not only improve quality of life of the putative victims but also would result in  
34  
35 significantly lower health care costs.  
36  
37  
38  
39  
40  
41  
42  
43  
44

45 Another type of impact would be long-term changes after the injury. The 'before and after' data  
46  
47 available in the NPHS consisted of comparing the cross-sectional data from the interview cycle before  
48  
49 the ALI with the data of the cycle reporting the ALI and with the next cycle after the ALI. While the  
50  
51 interviews for each respondent could be linked for the 'before and after' cycles it was more difficult to  
52  
53 determine which changes in attributes in the year of the ALI or subsequent years were sequelae of the  
54  
55  
56  
57  
58  
59  
60



1  
2  
3  
4 ALI. For example, it might make sense that the increasing obesity for people with ALI be linked to  
5 after-effects, e.g. [37], due to inactivity resulting from the ALI but, in fact, similar changes were  
6  
7 happening in the overall population. Given these caveats, we can note that no changes were found for  
8  
9 smoking and little change in excessive alcohol use. Most likely to show long-term effects due to ALI  
10  
11 were visits to medical doctors and ongoing pain. People with ALI showed increasing likelihood of  
12  
13 visiting a MD at least five times during the year which continued for the subsequent cycle. Similarly  
14  
15 pain increased in the cycle with the ALI and remained high over the years. Although this is weak  
16  
17 evidence, it confirms work on long-term effects of other researchers [38-39] and again emphasizes the  
18  
19 impact of ALI in the population.  
20  
21  
22  
23  
24  
25  
26  
27

28 Injuries have been found to lead to lost productivity, medical costs, compensation costs and  
29  
30 long-term health problems and disability [40-42], which was confirmed by the present results for the  
31  
32 Canadian population. Many injuries can be prevented and a better understanding of all aspects of  
33  
34 injuries will lead to better ways of prevention or the minimizing of their effects. However, collaboration  
35  
36 and cooperation is needed [43]. The European Union has committed itself to reducing number of traffic  
37  
38 fatalities from 45,000 to 25,000 by 2010, which as several reports point out, will require strong measures  
39  
40 against use of alcohol [44-47] and illicit and medicinal drugs before driving [48]. A difficulty in injury  
41  
42 prevention is the multi-faceted aspect of injuries. For example, a fall may have many causes, such as  
43  
44 unsafe working conditions or slippery stairs at home. Each of these issues would require different  
45  
46 approaches to prevention. Similar diversities are found for most other types of injuries. With all  
47  
48 difficulties inherent in devising effective interventions, prevention is still the best approach to lower the  
49  
50 tremendous impact of ALI on the Canadian population.  
51  
52  
53  
54  
55  
56  
57  
58  
59  
60

1  
2  
3  
4  
5  
6  
7 The NPHS data have important strengths, such as its representativeness of the Canadian  
8 population and its longitudinal nature. Because of the longitudinal design, it was possible to identify  
9 new ALI, meaning no ALI in the previous interview, and compare risk factors before and after the event,  
10 as well as its consequences. The 'before and after' comparisons of the same person allowed for matched  
11 analysis at different times. Important also is the extensive and consistent information available on each  
12 respondent over the multiple cycles of the survey, such as type of ALI, and the medical care needed.  
13  
14 Besides strengths, the NPHS also has limitations. One issue is the lack of distinction between intentional  
15 and unintentional injuries. Another issue is that of self-reported data. Part of self-reporting is recall of  
16 events. Recall of having had an ALI has been shown elsewhere to be less accurate with increasing time  
17 and is also likely to vary with the severity of the injury [49-50]. Both of these would likely lead to an  
18 under-reporting of ALI. In spite of its limitations the NPHS gives an invaluable view of the level of  
19 serious injury in the Canadian adult population over a 12 year time period.  
20  
21  
22  
23  
24  
25  
26  
27  
28  
29  
30  
31  
32  
33  
34  
35  
36  
37

38 Another strength of these data is the use of ALI as a measurement of injury. There are various  
39 units of measurement in measuring rates of injury in a population. The unit of measurement used in the  
40 present study consists of the most serious ALI over the previous 12 months, excluding repetitive strains  
41 injuries. The use of ALI means the delimitation of a particular kind of injury in the spectrum of injuries  
42 as a concept meaningful to both respondent and researchers. In addition, it identifies a type of injury  
43 sufficiently severe to impact a person's regular routine.  
44  
45  
46  
47  
48  
49  
50  
51  
52  
53

## 54 CONCLUSION

55  
56  
57  
58  
59  
60

1  
2  
3  
4 The findings from this study quantified the immediate and long term impact of individuals and  
5 population level injuries in Canada. The immediate impact was pain, disability, and disruption of regular  
6  
7  
8  
9 life. Long-term effects in patients were chronic pain and increased medical doctor's visits remaining  
10  
11 two years after the ALI. Population impact included loss of productivity and a considerable increase in  
12  
13 health care access and cost. This study also particularly contributes to injury prevention in social and  
14  
15  
16 psychological health services to help injured people make a better recovery and maintain the quality of  
17  
18  
19 life after injuries.  
20  
21  
22  
23  
24  
25  
26  
27  
28  
29  
30  
31  
32  
33  
34  
35  
36  
37  
38  
39  
40  
41  
42  
43  
44  
45  
46  
47  
48  
49  
50  
51  
52  
53  
54  
55  
56  
57  
58  
59  
60

## REFERENCES

1. Centre for Surveillance Coordination HC. Injury Surveillance in Canada: Current realities and Challenges. Ottawa: 2003; Health Canada.
2. Holtslag HR, Beeck EF van, Lichtveld RA, et al. Individual and population burdens of major trauma in the Netherlands. *Bull World Health Organ* 2008; 86:111–117.
3. Lyons RA, Kendrick D, Towner EM, et al. Measuring the Population Burden of Injuries—Implications for Global and National Estimates: A Multi-centre Prospective UK Longitudinal Study. *PLoS Med* 2011; 8(12): e1001140. doi:10.1371/journal.pmed.1001140.
4. Rivara FP, Thompson RS, Thompson, DC Calonge N. Injuries to Children and Adolescents: Impact on Physical Health. *Pediatrics* 1991;88:783-788.
5. Frank JW, Brooker AS, DeMaio S et al. Disability resulting from occupational low back pain part II: What do we know about secondary prevention? A review of the scientific evidence on prevention after disability begins. *Spine* 1996; 21(24):2918–2929.
6. Krause N, Frank JW, Dasinger LK et al. Determinants of duration of disability and return to work after work-related injury and illness: Challenges for future research. *Am J Ind Med* 2001;40:464–484.
7. Krause N, Ragland DR. Occupational disability due to low back pain: A new interdisciplinary classification based on a phase model of disability. *Spine* 1994;19(9):1011–1020.
8. Verbrugge LM, Jette AM. The disablement process. *Soc Sci Med* 1994;38(1):1–14.
9. MacPherson AK, Schull M, Manuel D et al. Injuries in Ontario: ICES Atlas. Toronto: Institute for Clinical Evaluative Sciences 2005;
10. MacKenzie EJ. Epidemiology of injuries: current trends and future challenges. *Epidemiol Rev* 2000; 22:112-9.
11. Schneier AJ, Shields BJ, Hostetler SG et al. Incidence of Pediatric Traumatic Brain Injury and Associated Hospital Resource Utilization in the United States. *Pediatrics*. 2006;118 (2):483-492.
12. Mayer T, Walker ML, Clark P. Further experience with a modified Abbreviated Injury Severity Scale. *J Trauma*. 1984;24:31-34.
13. Kraus JF, Fife D, Conroy C. Pediatric brain injuries: the nature, clinical course, and early outcomes in a defined United States' population. *Pediatrics*. 1987;79:501-507.
14. Casey R, Ludwig 5, McCormick MC. Morbidity following minor head trauma in children. *Pediatrics*. 1986;78:497-502.

15. Kraus JP, Fife D, Cox P et al. Incidence, severity and external causes of pediatric brain injury. *AJDC*. 1986;140:687-693.
16. Rivara FP, Calonge N, and Thompson R. Population-Based Study of Unintentional Injury Incidence and Impact during Childhood. *Am J Public Health* 1989;79:990-994.
17. Tambay J-L, Catlin G. Sample design of the National Population Health Survey. *Health Reports* 2006;7(1):29-38.
18. World Health Organization. What are overweight and obesity? Factsheet 2006; N°.311.
19. Majori S, Ricci G, Capretta F et al. Epidemiology of domestic injuries. A survey in an emergency department in North-East Italy. *J Prev Med Hyg*. 2009;50:164-9.
20. Scheiman S, Moghaddas HS, Bjornstig U et al. Bicycle injury events among older adults in Northern Sweden: a 10-year population based study. *Accid Anal Prev* 2010;42:758-63.
21. Ahmed LA, Schirmer H, Bjornerem A et al. The gender- and age-specific 10-year and lifetime absolute fracture risk in Tromso, Norway. *Eur J Epidemiol* 2009;24:441-8.
22. Ahmed LA, Emaus N, Berntsen GK, et al. Bone loss and the risk of non-vertebral fractures in women and men: the Tromso study. *Osteoporos Int*. 2010;21: 1503-11.
23. Aschkenasy MT, Rothenhaus TC. Trauma and falls in the elderly. *Emerg Med Clin North Am* 2006; 24:413-32.
24. Wilkins K. Medications and fall-related fractures in the elderly. *Health Rep* 1999;11:45-53.
25. Kendrick D, Vinogradova Y, Coupland C, et al. Getting back to work after injury: the UK Burden of Injury multicentre longitudinal study. *BMC Public Health* 2012;1 (12):584.
26. Kendrick D, Vinogradova Y, Coupland C, et al. Making a successful return to work: the UK burden of injury multicentre longitudinal study. *Br J Gen Pract* 2012 Feb; 62(595):e82-90.10.3399/bjgp12X625139.
27. Franche RL, Krause N. Readiness for Return to Work Following Injury or Illness: Conceptualizing the Interpersonal Impact of Health Care, Workplace, and Insurance Factors. *JOccup Rehabil* 2002; December 12 (4):233-256.
28. Frisina PG, Guellnitz R, Alverzo J. A time series analysis of falls and injury in the inpatient rehabilitation setting. *Rehabil Nurs* 2010;35:141-6.

- 1  
2  
3  
4  
5  
6  
7  
8  
9  
10  
11  
12  
13  
14  
15  
16  
17  
18  
19  
20  
21  
22  
23  
24  
25  
26  
27  
28  
29  
30  
31  
32  
33  
34  
35  
36  
37  
38  
39  
40  
41  
42  
43  
44  
45  
46  
47  
48  
49  
50  
51  
52  
53  
54  
55  
56  
57  
58  
59  
60
29. Pickett W, Hartling L, Brison RJ. A population-based study of hospitalized injuries in Kingston, Ontario, identified via the Canadian Hospitals Injury Reporting and Prevention Program. *Chronic Dis Can* 1997;18:61-9.
30. Dryden DM, Saunders LD, Rowe BH et al. Utilization of health services following spinal cord injury: a 6-year follow-up study. *Spinal Cord* 2004; 42:513-525.
31. Brown JA, Shannon HS, McDonough P et al. Healthcare Use of Families of Injured Workers Before and After a Workplace Injury in British Columbia, Canada. *Healthcare Policy* 2007; 2(3):1-124.
32. Berthelot J-M and the Project Team. Injury hospitalizations and socio-economic status. Ottawa, Ontario: 2010; CIHI.
33. Compston J. Osteoporosis: social and economic impact. *Radiol Clin North Am* 2010;48:477-82.
34. Berdahl TA, Zodet M. Medical care utilization for work-related injuries in the United States 2002-2006. *Med Care* 2010;48:645-51.
35. de Castro AB, Fujishiro K, Rue T et al. Associations between work schedule characteristics and occupational injury and illness. *Int Nurs Rev* 2010;57:188-94.
36. Lombardi DA, Folkard S, Willetts JL et al. Daily sleep, weekly working hours, and risk of work-related injury: US National Health Interview Survey (2004-2008). *Chronobiol Int* 2010;27(5):1013-30.
37. Bergkvist D, Hekmat K, Svensson T, et al. Obesity in orthopedic patients. *Surg Obes Relat Dis* 2009; 5:670-2.
38. Cameron CM, Kliwer EV, Purdie DM et al. Long term health outcomes after injury in working age adults: a systematic review. *J Epidemiol Community Health* 2006;60:341-4.
39. Toft AM, Moller H, Laursen B. The years after an injury: long-term consequences of injury on self-rated health. *J Trauma* 2010;69:26-30.
40. Borgstrom F, Zethraeus N, Johnell O, et al. Costs and quality of life associated with osteoporosis-related fractures in Sweden. *Osteoporos Int* 2006;17:637-50.
41. Brainsky A, Glick H, Lydick E, et al. The economic cost of hip fractures in community-dwelling older adults: a prospective study. *J Am Geriatr Soc* 1997;45:281-7.
42. Hendrie D, Hall SE, Arena G et al. Health system costs of falls of older adults in Western Australia. *Aust Health Rev* 2004; 28:363-73.
43. Sleet DA, Moffett DB. Framing the problem: injuries and public health. *Fam Community Health* 2009;32:88-97.

- 1  
2  
3  
4  
5 44. Desapriya E, Pike I, Raina P. Severity of alcohol-related motor vehicle crashes in British Columbia:  
6 case - control study. *Int J Contr Saf Promot* 2006;13:89-94.  
7  
8 45. Kool B, Ameratunga S, Robinson E et al. The contribution of alcohol to falls at home among  
9 working-aged adults. *Alcohol* 2008;42:383-8.  
10  
11 46. Kool B, Ameratunga S, Jackson R. The role of alcohol in unintentional falls among young and  
12 middle-aged adults: a systematic review of epidemiological studies. *Inj Prev* 2009; 15:341-7.  
13  
14 47. Ahlm K, Bjornstig U, Ostrom M. Alcohol and drugs in fatally and non-fatally injured motor vehicle  
15 drivers in northern Sweden. *Accid Anal Prev* 2009; 41:129-36.  
16  
17 48. Gouille JP, Verstraete A, Boulu R, et al. Illicit drugs, medications and traffic accidents. *Ann Pharm*  
18 *Fr* 2008;66:196-205.  
19  
20 49. Wilkins K, Mackenzie SG. Work injuries. *Health Rep* 2007;18:25-42.  
21  
22 50. Warner M, Schenker N, Heinen MA et al. The effects of recall on reporting injury and poisoning  
23 episodes in the National Health Interview Survey. *Inj Prev* 2005;11:282-7.  
24  
25  
26  
27  
28  
29  
30  
31  
32  
33  
34  
35  
36  
37  
38  
39  
40  
41  
42  
43  
44  
45  
46  
47  
48  
49  
50  
51  
52  
53  
54  
55  
56  
57  
58  
59  
60

**Table 1: The estimated percent of adult Canadians reporting an activity limiting injury in the previous year based on NPHS data, 1996-2006**

| Year                                  | 1996  | 1998  | 2000  | 2002  | 2004  | 2006  |
|---------------------------------------|-------|-------|-------|-------|-------|-------|
| All                                   | 10.5  | 10.9  | 11.4  | 12.6  | 12.6  | 12.8  |
| <b>Background variables</b>           |       |       |       |       |       |       |
| Married/common law                    | 71.0  | 69.3  | 68.2  | 66.2  | 65.7  | 64.7  |
| Low income                            | 40.0  | 34.2  | 27.9  | 26.0  | 23.5  | 19.8  |
| Completed High School                 | 89.6  | 89.9  | 89.3  | 84.7  | 84.5  | 84.5  |
| Rural                                 | 17.9  | 20.5  | 21.0  | 20.6  | 19.9  | 22.0  |
| Immigrant                             | 17.5  | 17.3  | 16.8  | 16.2  | 16.1  | 15.7  |
| <b>Health related variables</b>       |       |       |       |       |       |       |
| Current smoking                       | 22.7  | 21.3  | 20.4  | 17.1  | 17.1  | 16.0  |
| Inactive                              | 58.3  | 52.9  | 56.1  | 48.3  | 51.0  | 45.9  |
| Obese                                 | 18.4  | 21.2  | 23.0  | 24.3  | 25.0  | 26.4  |
| 9+ alcohol drinks/ week               | 11.0  | 11.6  | 11.9  | 11.8  | 11.6  | 14.8  |
| <b>Region of residence</b>            |       |       |       |       |       |       |
| Atlantic                              | 8.8   | 8.7   | 8.9   | 8.8   | 8.7   | 8.7   |
| Quebec                                | 25.5  | 25.6  | 25.9  | 26.0  | 26.1  | 25.9  |
| Ontario                               | 36.3  | 36.0  | 36.0  | 35.8  | 36.1  | 36.2  |
| Prairies                              | 17.0  | 17.3  | 17.1  | 17.4  | 17.3  | 17.4  |
| BC                                    | 12.5  | 12.4  | 12.1  | 12.0  | 11.8  | 11.9  |
| <b>Outcome-related</b>                |       |       |       |       |       |       |
| Limited activity                      | 17.3  | 17.8  | 18.0  | 22.9  | 24.5  | 26.6  |
| Poor health status                    | 33.6  | 33.2  | 38.0  | 41.2  | 42.3  | 43.5  |
| 5+ Medical Doctor visits /year        | 24.2  | 26.3  | 26.6  | 27.6  | 28.3  | 26.8  |
| Pain                                  | 12.3  | 13.7  | 13.3  | 15.1  | 16.4  | 15.8  |
| Stress                                | 26.3  | 29.2  | 25.1  | 27.3  | 28.3  | 27.4  |
| Depression                            | 6.1   | 5.8   | 6.4   | 6.9   | 7.1   | 6.0   |
| <b>Medication use in last 30 days</b> |       |       |       |       |       |       |
| Pain medication                       | 65.6  | 67.5  | 70.1  | 70.2  | 70.4  | 70.6  |
| Tranquilizer/ sedative                | 5.1   | 5.3   | 6.8   | 8.1   | 8.2   | 10.0  |
| Antidepressants                       | 3.6   | 4.4   | 5.4   | 5.9   | 6.9   | 7.0   |
| Total Number <sup>1</sup>             | 7,313 | 7,529 | 7,717 | 7,875 | 8,085 | 8,324 |



1  
2  
3  
4  
5  
6  
7  
8  
9  
10  
11  
12  
13  
14  
15  
16  
17  
18  
19  
20  
21  
22  
23  
24  
25  
26  
27  
28  
29  
30  
31  
32  
33  
34  
35  
36  
37  
38  
39  
40  
41  
42  
43  
44  
45  
46  
47  
48  
49  
50  
51  
52  
53  
54  
55  
56  
57  
58  
59  
60

<sup>1</sup> total number of survey respondents used to calculate weighted percentages representative of the Canadian population

For peer review only

**Table 3: The percent of persons reporting specific health care use among those reporting an ALI by age group and sex, NPHS, Canada, 2000-2006\***

| Year      |                                      | 2000 | 2002 | 2004 | 2006  |
|-----------|--------------------------------------|------|------|------|-------|
| All       | Number of ALI                        | 865  | 932  | 913  | 1,005 |
|           | Medical Doctor (MD) visits (5+/year) | 29.8 | 27.1 | 27.3 | 25.3  |
|           | Emergency Department (ED) visits     | 34.0 | 28.5 | 31.0 | 28.8  |
|           | Hospital admission in 48 hours       | 6.5  | 5.4  | 5.5  | 4.9   |
|           | Other                                | 2.7  | 4.3  | 3.1  | 5.2   |
|           | Any                                  | 66.6 | 60.0 | 61.5 | 59.3  |
|           | None                                 | 33.5 | 40.1 | 38.5 | 40.7  |
| Males     | Number of ALI                        | 394  | 460  | 463  | 482   |
|           | MD visits (5+/year)                  | 26.6 | 26.5 | 24.7 | 23.6  |
|           | ED visits                            | 34.5 | 27.4 | 30.8 | 29.7  |
|           | Hospital admission in 48 hours       | 9.5  | 4.5  | 4.6  | 4.1   |
|           | Other                                | 4.1  | 4.0  | 2.9  | 5.3   |
|           | Any                                  | 65.2 | 57.8 | 58.4 | 58.5  |
|           | None                                 | 34.8 | 42.2 | 41.6 | 41.5  |
| Females   | Number of ALI                        | 471  | 472  | 450  | 523   |
|           | MD visits (5+/year)                  | 32.6 | 27.7 | 30.5 | 27.3  |
|           | ED visits                            | 33.6 | 29.9 | 31.3 | 27.8  |
|           | Hospital admission in 48 hours       | 4.0  | 6.4  | 6.6  | 5.7   |
|           | Other                                | 1.5  | 4.7  | 3.4  | 5.1   |
|           | Any                                  | 67.7 | 62.4 | 65.2 | 60.2  |
|           | None                                 | 32.3 | 37.6 | 34.8 | 39.7  |
| Age 20-49 | Number of ALI                        | 588  | 601  | 564  | 590   |
|           | MD visits (5+/year)                  | 29.1 | 27.7 | 28.5 | 24.3  |
|           | ED visits                            | 34.3 | 27.6 | 28.7 | 27.3  |
|           | Hospital admission in 48 hours       | 6.2  | 4.1  | 2.9  | 3.6   |
|           | Other                                | 2.5  | 4.1  | 3.1  | 7.3   |
|           | Any                                  | 65.8 | 59.3 | 3.2  | 58.9  |
|           | None                                 | 34.2 | 40.7 | 39.7 | 41.1  |
| Age 50+   | Number of ALI                        | 277  | 331  | 349  | 415   |
|           | MD visits (5+/year)                  | 31.5 | 25.8 | 25.3 | 26.9  |
|           | ED visits                            | 33.6 | 30.6 | 34.9 | 31.1  |
|           | Hospital admission in 48 hours       | 7.3  | 8.1  | 9.9  | 6.9   |
|           | Other                                | 3.2  | 4.9  | 3.2  | 1.9   |
|           | Any                                  | 61.4 | 59.3 | 63.5 | 59.9  |
|           | None                                 | 31.8 | 38.6 | 36.6 | 40.1  |

**Table 2: Percentages for ALI for which were impacted by activity limitation per year, NPHS, Canada, 2000-2006**

| Years             |                         | 2000 | 2002 | 2004 | 2006 |
|-------------------|-------------------------|------|------|------|------|
|                   | <b>Injury status</b>    |      |      |      |      |
| <b>All</b>        | None                    | 85.5 | 84.0 | 84.0 | 82.2 |
|                   | Activity limiting (yes) | 10.8 | 12.1 | 11.6 | 12.0 |
|                   | Activity limiting (no)  | 3.1  | 3.0  | 3.5  | 5.1  |
|                   | Both                    | 0.6  | 0.4  | 1.0  | 0.8  |
| <b>Males</b>      | None                    | 84.9 | 82.0 | 82.2 | 80.1 |
|                   | Activity limiting (yes) | 10.5 | 13.5 | 13.2 | 13.2 |
|                   | Activity limiting(no)   | 3.9  | 3.9  | 3.4  | 5.6  |
|                   | Both                    | 0.7  | 0.7  | 1.3  | 1.1  |
| <b>Females</b>    | None                    | 86.0 | 85.8 | 85.7 | 84.1 |
|                   | Activity limiting (yes) | 11.1 | 10.8 | 10.1 | 10.9 |
|                   | Activity limiting(no)   | 2.4  | 3.0  | 3.6  | 4.6  |
|                   | Both                    | 0.5  | 0.4  | 0.7  | 0.5  |
| <b>Ages 20-49</b> | None                    | 83.5 | 81.7 | 81.2 | 79.3 |
|                   | Activity limiting (yes) | 12.2 | 13.9 | 13.3 | 14.0 |
|                   | Activity limiting(no)   | 3.5  | 3.7  | 4.3  | 5.8  |
|                   | Both                    | 0.8  | 0.7  | 1.3  | 0.9  |
| <b>Ages 50+</b>   | None                    | 88.5 | 87.2 | 87.4 | 85.3 |
|                   | Activity limiting (yes) | 8.6  | 9.5  | 9.5  | 9.8  |
|                   | Activity limiting (no)  | 2.6  | 3.1  | 2.5  | 4.2  |
|                   | Both                    | 0.3  | 0.3  | 0.6  | 0.6  |

**Table 4: The type of activity-limiting injury as a proportion of all activity-limiting injuries ALI NPHS, Canada, 1996-2006**

|                | Interview cycles           | 1996             | 1998             | 2000             | 2002             | 2004             | 2006             |
|----------------|----------------------------|------------------|------------------|------------------|------------------|------------------|------------------|
| N <sup>2</sup> | Number of ALI              | 755              | 786              | 865              | 931              | 911              | 1,006            |
|                |                            | <sup>1</sup> wt% |
| ALL            | Brain, internal, multiple  | 4.9              | 3.3              | 5.8              | 3.2              | 3.9              | 4.3              |
|                | Fractures/dislocation      | 20.6             | 21.2             | 19.9             | 20.3             | 22.2             | 24.9             |
|                | Burns                      | 5.3              | 3.3              | 4.3              | 2.8              | 4.3              | 3.7              |
|                | Sprains, strains           | 42.0             | 42.3             | 42.4             | 47.3             | 42.8             | 42.2             |
|                | Cuts, punctures, bites     | 10.2             | 15.5             | 11.8             | 11.6             | 11.1             | 9.7              |
|                | Scrapes, bruises, blisters | 7.7              | 6.9              | 7.8              | 4.8              | 7.1              | 6.3              |
|                | Other                      | 9.3              | 7.5              | 8.0              | 10.0             | 8.6              | 8.9              |
|                | Total                      | 100.0            | 100.0            | 100.0            | 100.0            | 100.0            | 100.0            |
| Males          | Brain, internal, multiple  | 5.4              | 2.8              | 5.0              | 2.4              | 4.1              | 4.5              |
|                | Fractures/dislocation      | 21.3             | 21.5             | 21.5             | 20.3             | 21.0             | 26.1             |
|                | Burns                      | 5.8              | 2.4              | 3.9              | 3.5              | 4.6              | 2.7              |
|                | Sprains, strains           | 39.6             | 42.6             | 40.5             | 47.2             | 41.7             | 39.8             |
|                | Cuts, punctures, bites     | 12.2             | 17.4             | 16.7             | 13.9             | 13.6             | 13.1             |
|                | Scrapes, bruises, blisters | 6.2              | 5.2              | 5.7              | 4.4              | 6.2              | 5.8              |
|                | Other                      | 9.5              | 8.1              | 6.7              | 8.3              | 8.8              | 8.0              |
| Females        | Brain, internal, multiple  | 4.3              | 3.9              | 6.4              | 3.8              | 3.6              | 4.2              |
|                | Fractures/dislocation      | 19.8             | 21.0             | 18.5             | 21.6             | 23.6             | 23.3             |
|                | Burns                      | 4.5              | 4.1              | 4.7              | 3.6              | 4.0              | 4.8              |
|                | Sprains, strains           | 45.0             | 41.9             | 44.1             | 46.0             | 44.3             | 44.9             |
|                | Cuts, punctures, bites     | 7.8              | 13.3             | 7.7              | 9.1              | 7.9              | 6.0              |
|                | Scrapes, bruises, blisters | 9.5              | 8.9              | 9.5              | 6.4              | 8.2              | 7.0              |
|                | Other                      | 9.1              | 6.9              | 9.1              | 9.5              | 8.4              | 9.8              |
| Age 20-49      | Brain, internal, multiple  | 4.8              | 3.3              | 4.9              | 3.1              | 3.7              | 3.0              |
|                | Fractures/dislocation      | 17.4             | 19.8             | 22.5             | 17.4             | 18.2             | 22.9             |
|                | Burns                      | 5.5              | 3.3              | 4.1              | 3.5              | 5.0              | 4.8              |
|                | Sprains, strains           | 43.8             | 47.2             | 42.8             | 51.3             | 50.9             | 46.3             |
|                | Cuts, punctures, bites     | 10.9             | 15.5             | 11.5             | 10.7             | 9.4              | 9.4              |
|                | Scrapes, bruises, blisters | 8.5              | 5.0              | 7.5              | 4.5              | 4.4              | 4.6              |
|                | Other                      | 9.1              | 5.9              | 6.7              | 9.5              | 8.4              | 9.0              |
| Age 50+        | Brain, internal, multiple  | 5.4              | 3.4              | 7.6              | 3.4              | 4.2              | 6.3              |
|                | Fractures/dislocation      | 30.8             | 24.9             | 13.8             | 26.4             | 29.0             | 27.9             |
|                | Burns                      | 4.3              | 3.0              | 4.9              | 1.4              | 3.3              | 1.9              |
|                | Sprains, strains           | 36.2             | 30.2             | 41.7             | 39.0             | 29.1             | 35.8             |

1  
2  
3  
4  
5  
6  
7  
8  
9  
10  
11  
12  
13  
14  
15  
16  
17  
18  
19  
20  
21  
22  
23  
24  
25  
26  
27  
28  
29  
30  
31  
32  
33  
34  
35  
36  
37  
38  
39  
40  
41  
42  
43  
44  
45  
46  
47  
48  
49  
50  
51  
52  
53  
54  
55  
56  
57  
58  
59  
60

|                            |      |      |      |      |      |      |
|----------------------------|------|------|------|------|------|------|
| Cuts, punctures, bites     | 8.1  | 15.2 | 12.5 | 13.4 | 13.7 | 10.3 |
| Scrapes, bruises, blisters | 5.1  | 11.7 | 8.5  | 5.4  | 11.7 | 9.1  |
| Other                      | 10.1 | 11.6 | 11.0 | 11.0 | 9.0  | 8.7  |

<sup>1</sup> wt%--Weighted percentages making rates representative of the Canadian population

<sup>2</sup> Number of ALI in study population

---

For peer review only

**Table 5: Odds ratios (OR) and 95% confidence interval (C.I.) of ALI by life style and socioeconomic status, adjusted for sex and age, NPHS, Canada, 1996-2006**

|                                         |                          | 1996        |           | 1998      |           | 2000      |           | 2002      |           | 2004      |           | 2006      |           |           |
|-----------------------------------------|--------------------------|-------------|-----------|-----------|-----------|-----------|-----------|-----------|-----------|-----------|-----------|-----------|-----------|-----------|
|                                         |                          | OR          | 95% C.I.  | OR        | 95% C.I.  | OR        | 95% C.I.  | OR        | 95% C.I.  | OR        | 95% C.I.  | OR        | 95% C.I.  |           |
| <b>Age groups</b>                       |                          |             |           |           |           |           |           |           |           |           |           |           |           |           |
|                                         | M/F                      | 1.4*        | 1.1 - 1.6 | 1.3*      | 1.1 - 1.6 | 0.9       | 0.8 - 1.1 | 1.3*      | 1.1 - 1.5 | 1.4*      | 1.2 - 1.6 | 1.3*      | 1.1 - 1.4 |           |
|                                         | 20-39                    | 2.1*        | 1.6 - 2.9 | 1.9*      | 1.5 - 2.4 | 1.8*      | 1.4 - 2.3 | 2.2*      | 1.8 - 2.7 | 1.8*      | 1.5 - 2.2 | 2.2*      | 1.8 - 2.6 |           |
|                                         | 40-59                    | 1.6*        | 1.1 - 2.1 | 1.4*      | 1.1 - 1.8 | 1.3       | 1.0 - 1.6 | 1.6*      | 1.3 - 2.0 | 1.3       | 1.0 - 1.5 | 1.5*      | 1.2 - 1.8 |           |
|                                         | 60+<br>(reference)       | 1.0         | ~         | 1.0       | ~         | 1.0       | ~         | 1.0       | ~         | 1.0       | ~         | 1.0       | ~         |           |
| <b>Background variables<sup>2</sup></b> |                          |             |           |           |           |           |           |           |           |           |           |           |           |           |
|                                         | Married/<br>Common-law   | yes/no      | 1.0       | 0.8 - 1.2 | 1.0       | 0.8 - 1.2 | 1.0       | 0.8 - 1.2 | 1.0       | 0.9 - 1.2 | 0.9       | 0.7 - 1.0 | 0.9       | 0.8 - 1.0 |
|                                         | income                   | low/high    | 1.1       | 0.9 - 1.3 | 1.0       | 0.9 - 1.3 | 1.2       | 1.0 - 1.4 | 0.9       | 0.8 - 1.1 | 1.1       | 0.9 - 1.3 | 1.2       | 1.0 - 1.4 |
|                                         | Completed<br>High School | yes/no      | 1.2       | 1.0 - 1.5 | 1.1       | 0.9 - 1.3 | 1.0       | 0.8 - 1.2 | 0.9       | 0.8 - 1.1 | 0.9       | 0.7 - 1.0 | 1.1       | 0.9 - 1.3 |
|                                         | Rural                    | yes/no      | 1.1       | 0.9 - 1.4 | 1.1       | 0.9 - 1.3 | 0.9       | 0.7 - 1.1 | 1.1       | 0.9 - 1.3 | 0.8       | 0.7 - 1.0 | 1.0       | 0.8 - 1.1 |
|                                         | Non-English<br>Immigrant | yes/no      | 0.9       | 0.7 - 1.1 | 0.9       | 0.7 - 1.0 | 0.8       | 0.7 - 1.0 | 0.8       | 0.7 - 1.0 | 0.7       | 0.6 - 0.9 | 0.8       | 0.7 - 0.9 |
|                                         |                          | yes/no      | 0.6*      | 0.5 - 0.8 | 0.7*      | 0.6 - 0.9 | 0.8       | 0.6 - 1.0 | 0.8       | 0.6 - 1.0 | 0.7*      | 0.5 - 0.8 | 0.7*      | 0.6 - 0.9 |
| <b>Health related<sup>3</sup></b>       |                          |             |           |           |           |           |           |           |           |           |           |           |           |           |
|                                         | Current<br>smoking       | yes/no      | 1.1       | 0.9 - 1.4 | 1.1       | 0.9 - 1.3 | 1.2       | 1.0 - 1.5 | 1.2       | 1.0 - 1.5 | 0.9       | 0.8 - 1.1 | 0.9       | 0.7 - 1.1 |
|                                         | Physical<br>inactivity   | yes/no      | 0.8       | 0.7 - 0.9 | 0.8       | 0.7 - 0.9 | 0.8       | 0.6 - 0.9 | 0.9       | 0.8 - 1.1 | 0.8       | 0.7 - 0.9 | 0.8       | 0.7 - 0.9 |
|                                         | Obese                    | yes/no      | 1.2       | 1.0 - 1.5 | 1.2       | 1.0 - 1.5 | 1.1       | 0.9 - 1.3 | 1.0       | 0.9 - 1.2 | 1.1       | 0.9 - 1.3 | 1.0       | 0.8 - 1.1 |
|                                         | Alcohol<br>drink /week   | 9+/less     | 1.2       | 0.9 - 1.5 | 1.2*      | 1.0 - 1.6 | 1.3*      | 1.0 - 1.7 | 1.4*      | 1.2 - 1.8 | 1.2       | 1.0 - 1.5 | 1.5*      | 1.3 - 1.8 |
|                                         | Alcohol 5+ at<br>a time  | weekly/less | 1.3*      | 1.0 - 1.5 | 1.4*      | 1.2 - 1.7 | 1.4*      | 1.2 - 1.7 | 1.2*      | 1.0 - 1.5 | 1.3*      | 1.1 - 1.5 | 1.3*      | 1.1 - 1.5 |

1. For sex group, females are the reference group

2. For background variables comparison groups, the second listed group for binary variables is the reference group

3. For health-related comparison groups, the second listed group for binary variables is the reference group

\* Means that there are statistically significant difference compared with control groups

**Table 6: life style, socioeconomic status, and health care utilization of persons with an activity limiting injury before and after the injury, NPHS, Canada, 1994-2006**

|                                                                                  |               | Before  | During | After | p value* |        |        | N**    |       |
|----------------------------------------------------------------------------------|---------------|---------|--------|-------|----------|--------|--------|--------|-------|
|                                                                                  |               | %       | %      | %     | A vs B   | B vs C | A vs C |        |       |
|                                                                                  |               | A       | B      | C     |          |        |        |        |       |
| <b>Risky behaviours and socioeconomic status</b>                                 |               |         |        |       |          |        |        |        |       |
| Income                                                                           | low           | 36.3    | 32.1   | 28.5  | <0.001   | <0.001 | <0.001 | 2,892  |       |
| Obese                                                                            | obese         | 17.8    | 19.7   | 22.4  | 0.005    | <0.001 | <0.001 | 1,780  |       |
| Physical activity                                                                | inactive      | 50.4    | 47.1   | 48.1  | 0.001    | 0.197  | 0.343  | 3,044  |       |
| Smoking                                                                          | current       | 19.0    | 18.5   | 18.2  | 0.265    | 0.384  | 0.077  | 1,693  |       |
| Alcohol drinking                                                                 | 9+/week       | 9.6     | 10.7   | 11.2  | 0.048    | 0.535  | 0.349  | 3,548  |       |
| <b>Health-related issues</b>                                                     |               |         |        |       |          |        |        |        |       |
| Limited activity                                                                 | yes           | 18.7    | 25.5   | 26.3  | <0.001   | 0.221  | <0.001 | 3,657  |       |
| Health status                                                                    | poor          | 33.1    | 36.3   | 39.6  | <0.001   | <0.001 | <0.001 | 3,653  |       |
| Medical Doctor                                                                   | visits        | 5+/year | 26.5   | 34.0  | 29.8     | <0.001 | <0.001 | <0.001 | 3,616 |
| Pain                                                                             | yes           | 13.7    | 16.8   | 17.3  | <0.001   | 0.432  | <0.001 | 3,657  |       |
| Stress                                                                           | yes           | 29.7    | 31.3   | 29.4  | 0.104    | 0.050  | 0.757  | 2,967  |       |
| <b>Medication use in past 30 days before interview</b>                           |               |         |        |       |          |        |        |        |       |
| Pain medication                                                                  | yes           | 61.9    | 70.2   | 70.8  | <0.001   | 0.489  | <0.001 | 3,640  |       |
| Sedatives                                                                        | /tranquiliser | yes     | 5.7    | 7.2   | 8.1      | 0.001  | 0.055  | <0.001 | 3,639 |
| Antidepressants                                                                  | yes           | 4.2     | 5.9    | 6.2   | <0.001   | 0.346  | 0.403  | 3,641  |       |
| *P value calculated by McNemar's test                                            |               |         |        |       |          |        |        |        |       |
| ** N of persons making up the matched analysis for the before and after analysis |               |         |        |       |          |        |        |        |       |

1  
2  
3  
4  
5  
6  
7  
8  
9  
10  
11  
12  
13  
14  
15  
16  
17  
18  
19  
20  
21  
22  
23  
24  
25  
26  
27  
28  
29  
30  
31  
32  
33  
34  
35  
36  
37  
38  
39  
40  
41  
42  
43  
44  
45  
46  
47  
48  
49  
50  
51  
52  
53  
54  
55  
56  
57  
58  
59  
60

**Impact of Activity-Limiting Injuries based on the Canadian National Population Health Survey 1994-2006**

Frank Mo<sup>1</sup>, PhD; Ineke Neutel<sup>2</sup>, PhD; Howard Morrison, PhD; Doug Hopkins, BA; Caroline Da Silva, BSc; Ying Jiang<sup>1</sup>, MSc

**Author references:**

<sup>1</sup>[Science<sup>1</sup> Consumer Product Safety and Injury Risk Assessment Program Working Group](#)

[Science](#) Integration Division

[Centre for Chronic Disease Prevention and Control](#)

Public Health Agency of Canada

<sup>2</sup>Department of Epidemiology and Community Medicine, Faculty of Medicine, University of Ottawa

**KEYWORDS** [Activity limiting injury; impact factors; longitudinal health survey; epidemiology; injury prevention; Canada.](#)

**Correspondence to**

[Dr. Frank Mo, Science Integration Division](#)

[Centre for Chronic Disease Prevention and Control](#)

[Public Health Agency of Canada](#)

[Frank.Mo@phac-aspc.gc.ca](mailto:Frank.Mo@phac-aspc.gc.ca)

**Running title: Impact of Activity-Limiting Injury trends**

**Word count:**

**Abstract: 286**

**Manuscript: 3,496**

Formatted: Right: 1"

Formatted: Centered

Formatted: Font: Not Bold

Formatted: No widow/orphan control, Adjust space between Latin and Asian text, Adjust space between Asian text and numbers, Tab stops: -0.76", Left + -0.5", Left + 0", Left + 0.5", Left + 1", Left + 1.5", Left + 2", Left + 2.5", Left + 3", Left + 3.5", Left + 4", Left + 4.5", Left + 5", Left + 5.5", Left + 6", Left + 6.5", Left + 7", Left + 7.5", Left + 8", Left + 8.5", Left + 9", Left + 9.5", Left + 10", Left + 10.5", Left + 11", Left + 11.5", Left + 12", Left + 12.5", Left + 13", Left

Formatted: Line spacing: At least 12 pt



ABSTRACT

**Objective:** To examine the ~~impact~~prevalence and factors ~~of affecting~~ activity-limiting injuries (ALI) on individuals and on the Canadian population; to ~~detect-estimate the~~ short and long term impact ~~after injuries on health status and well-being due to ALI in Canada from 1994 to 2006 using~~ the Canadian National Population Health Survey (NPHS) ~~from 1994 to 2006-].~~

**MethodsDesign:** The NPHS is a randomised longitudinal cohort study with biennial interviews, with information on age, sex, education, marital status, income, residence, height and weight to self-perceived health status, health care utilization and medication use in addition to ALI.

**Setting:** The study population was ~~drawn from the National Population Health Survey which was started from 1994 to 2006 with a random sample of 17,276 people, who were re-interviewed biennially. The study population consisted of 7,300 to 8,300 people over male and female participants 20 years old and older from ten provinces and three territories in Canada.~~

**Primary and secondary outcome measures:** Logistic regression ~~model was models were~~ used to ~~detect assess~~ the potential impact of ALI on individuals and on ~~the~~ Canadian population. The interviews two years before and two years after the ALI were compared to examine long-term effects, and the McNemar test option in SAS was used for ~~the~~ matched analysis.

**Results:** The immediate ~~impact was impacts of an ALI were~~ pain, disability, and disruption of regular life. Long-term effects in patients were chronic pain and increased medical doctor visits ~~after ALI~~. Population impact included ~~loss of productivity of 10% of the most productive and~~ a considerable increase in health care access and cost. The odds ratios (ORs) for the 20-39 age group ~~and males is more than for females for most years (compared to those 60+ was~~ OR, 2.2; 95% CI, 1.8-2.7 ~~and), while the OR associated with being male was~~ 1.4; 95% CI, 1.1-1.6). Individuals consuming nine or more alcoholic drinks per week ~~have were also~~ significantly ~~difference~~ more likely to report an ALI (OR, 1.5; 95% CI, 1.3-1.8).

**Conclusion:** The findings from this study illustrated the immediate and long term impact of individuals and population level injuries in Canada. Injury control policies should aim to prevent the both the number of injuries fatalities as well as the consequences among survivors.

**KEYWORDS** ~~Activity limiting injury; impact factors; longitudinal health survey; epidemiology; injury prevention; Canada.~~

~~Word count:~~

~~Abstract: 265~~

~~Manuscript: 3,496~~

Summary Boxes:

What is already known on this subject?

Formatted: Font color: Black, English (U.S.)

Formatted: Font color: Black

Formatted: Font color: Black

Formatted: Font color: Black

Formatted: Line spacing: Multiple 1.15 li

Formatted: Font color: Black

Formatted: Widow/Orphan control, Don't adjust space between Latin and Asian text, Don't adjust space between Asian text and numbers, Tab stops: Not at -0.76" + -0.5" + 0" + 0.5" + 1" + 1.5" + 2" + 2.5" + 3" + 3.5" + 4" + 4.5" + 5" + 5.5" + 6" + 6.5" + 7" + 7.5" + 8" + 8.5" + 9" + 9.5" + 10" + 10.5" + 11" + 11.5" + 12" + 12.5" + 13"

Formatted: Font: Not Bold

Formatted: No widow/orphan control, Adjust space between Latin and Asian text, Adjust space between Asian text and numbers, Tab stops: -0.76", Left + -0.5", Left + 0", Left + 0.5", Left + 1", Left + 1.5", Left + 2", Left + 2.5", Left + 3", Left + 3.5", Left + 4", Left + 4.5", Left + 5", Left + 5.5", Left + 6", Left + 6.5", Left + 7", Left + 7.5", Left + 8", Left + 8.5", Left + 9", Left + 9.5", Left + 10", Left + 10.5", Left + 11", Left + 11.5", Left + 12", Left + 12.5", Left + 13", Left

Formatted: Widow/Orphan control, Don't adjust space between Latin and Asian text, Don't adjust space between Asian text and numbers, Tab stops: Not at -0.76" + -0.5" + 0" + 0.5" + 1" + 1.5" + 2" + 2.5" + 3" + 3.5" + 4" + 4.5" + 5" + 5.5" + 6" + 6.5" + 7" + 7.5" + 8" + 8.5" + 9" + 9.5" + 10" + 10.5" + 11" + 11.5" + 12" + 12.5" + 13"

Formatted: Line spacing: At least 12 pt

- 1
- 2
- 3
- 4
- 5
- 6
- 7
- 8
- 9
- 10 1. Activity-limiting injuries (ALI) burden such as increased steadily prevalence, mortality and
- 11 economic costs in Canada;
- 12 2. Showing increasing trends in obesity, limited activity, poor health status, medication use related
- 13 to ALI;
- 14 3. Nature and types related to ALI;
- 15

16 What does this study add?

- 17 1. Potential associations between health care utilization and ALI before and after injury;
- 18 2. Hospital admission, Department emergency and medical doctors visits impacted on ALI;
- 19 3. The immediate individuals impact such as pain, disability, disruption of regular life. Long-term
- 20 effects in patients were sequelae, chronic pain, ~~stress~~ and increased medical doctor visits after
- 21 ALI. Population impact included loss of productivity ~~of 10% of the most productive~~ and a
- 22 considerable increase in health care access and cost.
- 23
- 24 4. policies should aim to prevent both the number of injuries fatalities as well as the consequences
- 25 among survivors.
- 26

27 **Competing Interest:**

28 None to declare.

29

30 **Funding Statement:**

31 This research received no specific grant from any funding agency in the public, commercial or not-for-

32 profit sectors.

33

34 **Contributorship Statement:**

35 Dr. Frank Mo, leader of the research project, and play the major role in research design, drafted the

36 article and critical review, and advising for data analysis and results interpretation.

37 Dr. Ineke C. Neutel, contributed to data analysis, assisted in research design and data analysis,

38 interpretation, and the report.

39 Dr. Howard Morrison, contributed to research consultation, provided critical review comments, and

40 advising for data analysis and revised critically the article.

41 Mr. Doug Hopkins, assisted in research design, provided literature review and critical comments and

42 signed final version of the manuscript.

43 Ms. Caroline Da Silva, participated in research design, provided critical review comments and signed

44 final version of the manuscript.

45 Ms. Ying Jiang, contributed to research design, provided literature and critical review comments, and

46 signed final version of the manuscript for submission.

47

48

49

50

51

52

53

54

55

56

57

58

59

60

Formatted: Don't adjust space between Latin and Asian text, Don't adjust space between Asian text and numbers

Formatted: Line spacing: At least 12 pt

## INTRODUCTION

Injuries are a serious public health issue with a major impact on the lives of Canadians. They are leading causes of death and hospitalization, as well as of disability, loss of productivity and potential years of life lost (PYLL) [1]. ~~Sequelae-4]. Sequelae~~ from injuries ~~can impact the quality of life for individuals and population levels, such as include~~ activity limitation, functional disability and pain ~~as process influenced by which in turn influence~~ a variety of social, psychological, ~~labour force,~~ and economic factors [2-5]. ~~A rather complete-8]. An~~ analysis of ~~injury in Canada was based on~~ emergency department (ED) visits and hospitalisation admissions for ~~all of Ontario province [6]. The analysis noted Ontario noted~~ that one in four ED visits were injury-related, as were one in every 17 hospitalisations [6]. These data ~~accentuate accentuated~~ the importance of injuries to the health care system. Other studies have ~~also~~ demonstrated the increasing medical doctor (MD) ~~contact contacts~~, the use more medications for pain, more days in hospital, and more hours of home care services [6-8,9-11].

Several studies of traumatic disability have also focused on injuries resulting in hospitalization [9,12], types of injury [10-11,13-14], and serious head injuries [12]. ~~Moreover, 15]. One study reported that~~ half of patients had some limitation in activity for two days or more due to injury, and patients

Formatted: Don't adjust space between Latin and Asian text, Don't adjust space between Asian text and numbers

Formatted: Line spacing: At least 12 pt

1  
2  
3  
4  
5  
6  
7  
8  
9  
10 treated in the clinic were somewhat more likely to have two or more days of limited activity than were  
11 patients treated in the ED [~~13~~16].

12  
13  
14  
15 Injuries are not only largely preventable, but the impact of injuries ~~could also~~ can usually be  
16 lessened. ~~In order to~~ To develop effective policies leading to the prevention of injuries and ~~reduced to~~  
17 reduce the impact of injuries on society, information is needed about the influenced effects that  
18  
19 individuals with injuries treated in the primary care setting and not requiring hospitalization frequently  
20  
21 result in significant functional impairment and to identify those injuries which, by virtue of their  
22  
23 contribution to disability, would be targets for prevention programs.  
24  
25

26  
27  
28 The objectives of this study are to explore the immediate and longer term consequences of injury  
29 including physical, psychological, social and occupational functioning. This comprises a longitudinal  
30 population health study, which will measure the impact of injuries on individual's and population level  
31  
32 health status and well-being due to activity-limiting injuries (ALI) in the NPHS from 1994 to 2006 in  
33  
34 Canada.  
35  
36

## 37 38 39 40 **METHODS**

### 41 42 **METHODOLOGY**

#### 43 44 **Study population**

45 The source population for this study ~~is was~~ the Canadian National Population Health Survey  
46 (NPHS), from 1994/1995 (cycle 1) to 2006/2007 (cycle 7) ~~with 17,276~~. The study population was  
47  
48 designed to be representative of the ~~respondents in~~ Canadian population with the ~~survey except~~  
49  
50

51  
52  
53  
54  
55  
56  
57  
58  
59  
60  
Formatted: Line spacing: At least 12 pt

~~for~~exception of persons living on Indian reserves or on Canadian Forces bases [~~6, 89, 11~~]. The sample design ~~is~~was a multiple cluster [~~14~~–~~17~~], ~~ideal for controlling costs when personal interviews are needed, as was the case for cycle 1 of the NPHS. To cover as much as possible of the Canadian population, separate components of the survey were also carried out in the Territories and in health care institutions. In the Territories, a simpler stratified design was used. As well, anticipating the creation of Nunavut, separate strata were formed for each of the future territories, Nunavut and NWT [17].~~ The sampling frame for the first cycle (1994/5) originated with the Canadian Labour Force Survey (CLFS), a multi-stage, stratified sampling technique used for all provinces except Quebec for which a provincial sampling frame was used [~~14~~]. ~~In the second cycle 1996–1997 the NPHS started using 17,276 of the respondents for a longitudinal component. For~~. From the 2000 cycle ~~a few changes onward~~, additional questions were ~~made in~~added to the questionnaire ~~including, such as~~ more detailed questions on health care use after the ALI, ~~with the result that some analyses are restricted to data from 2000 to 2006~~.

Formatted: Font color: Auto

Formatted: English (U.S.)

Nearly all respondents were re-interviewed biennially by telephone except for individuals without a telephone, for whom face to face interviews were used. Interviewers were instructed to follow all reasonable strategies to trace people. Response rates were 83.6% ~~from~~for cycle one ~~to~~, 92.8% for cycle two ~~92.8%~~, 88.3% for cycle three ~~88.3%~~, 84.9% for cycle four ~~84.9%~~, 80.8% for cycle five ~~80.8%~~, 77.6% for cycle six ~~77.6%~~, and 77.0% for cycle seven ~~77.0%~~.

~~For the present study, interview~~ To look at ADIs resulting from new injuries, data for cycles ~~for~~from 1996 to 2006 were used; data for 1994 was only used for the “before and after” analysis (Table

Formatted: Line spacing: At least 12 pt

6). Data were used from respondents who were willing to share their data for data analysis, ~~and~~ who completed all interviews to date, ~~and~~ ~~achieved ages~~ who achieved the age of 20 and over before 2006. Since the source population, i.e. the total NPHS population, covered more ages than ~~the study~~ ~~population, i.e.~~ the population analysed for this study, it was possible to add younger persons from the source population to our study population after the cycle at which they reached age of 20 years old. Consequently, the study population changed somewhat over the years of the study, ~~1996 to 2006~~ allowing comparable cross-sectional analysis of populations with the same age range and age distribution.

## Variables

The interview ranged from background questions (age, sex, education, marital status, income, residence, height and weight) to health-related questions (self-perceived health status, health care utilization and medication use). ~~For this study the answers were dichotomized.~~ Body mass index (BMI) was calculated as weight in kilograms divided by height in meters squared [~~15~~18]. A BMI of 30 ~~and/or~~ over was considered obese. Respondents were asked to rate their health as one of five categories: excellent, very good, good, fair or poor and for this study, the lower two categories were combined as poorer health and the top three as good health. Depression and stress were measured by the following questions: “have you had 2 weeks in a row during the past 12 months when you were sad, blue, or depressed?” and “During the past month, about how often did you feel: ... so sad that nothing could cheer you up? ... nervous? ... restless or fidgety? ... hopeless?... worthless?”. A question about number of visits to any type of physician or medical specialist in the past year was dichotomized as: “five or more visits, versus fewer than five visits”. Alcohol consumption was based on a series of question on the

**Formatted:** Widow/Orphan control, Don't adjust space between Latin and Asian text, Don't adjust space between Asian text and numbers, Tab stops: Not at -0.76" + -0.5" + 0" + 0.5" + 1" + 1.5" + 2" + 2.5" + 3" + 3.5" + 4" + 4.5" + 5" + 5.5" + 6" + 6.5" + 7" + 7.5" + 8" + 8.5" + 9" + 9.5" + 10" + 10.5" + 11" + 11.5" + 12" + 12.5" + 13"

**Formatted:** Line spacing: At least 12 pt

1  
2  
3  
4  
5  
6  
7  
8  
9  
10 number of drinks consumed each day of the past seven days before the interview. For this study, this  
11 was expressed as drinking nine or more drinks per week, versus drinking eight or less. In this study,  
12 “alcohol used 5+ at a time” was defined as “How often in the past week have you had 5 or more drinks  
13 on one occasion?”. The variable “hospital treatment” was described as “Did you receive any medical  
14 attention for this injury from a health professional within 48 hours?” For example, doctor, hospital  
15 emergency room. Quartiles of total household income were calculated for the study population ~~and, with~~  
16 the lower two quartiles combined for the low income category to be compared to the top two as  
17 highest ~~the high~~ income category. ~~A three part physical~~ A Physical activity index was calculated based  
18 on ~~kilo-calories~~ kilocalories per kilogram of body weight per day expended (KKD). Physically active  
19 ~~iswas~~ defined as energy expenditure of at least 3 KKD; ~~moderately active corresponds to energy~~  
20 ~~expenditure between 1.5 and 3 KKD;~~ and physically inactive ~~iswas~~ defined as less than 1.5 KKD.  
21 Medication use was elicited by the question: “In the past 30 days, did you take . . . ?” This was  
22 followed by a series of questions, such as “Did you take antidepressants?<sup>22</sup> and or anti-stressants?” “Did  
23 you take anything for pain?” A 'no' answer to the question "Are you usually free of pain and  
24 discomfort?" was taken as indication that the respondent often suffered pain. ▲

25  
26  
27  
28  
29  
30  
31  
32  
33  
34  
35  
36  
37  
38  
39 The definition of injury in the NPHS data was “In the past 12 months, did you have any injuries  
40 serious enough to limit your normal activities?” If more than one injury, the following questions were to  
41 refer to the most serious one. A separate question asked respondents a general question about  
42 limitations in activity, “Because of a long-term physical or mental condition or a health problem,  
43 ~~are~~ have you limited in the kind or amount of activity you ~~can~~ could do: at home? at school? at work? in  
44 other activities<sup>22</sup>?” Otherwise, they should be defined as non-activity limiting.

Formatted: Font color: Auto

Formatted: Font: 10 pt, Font color: Auto

Formatted: Line spacing: At least 12 pt

## Data Analysis

For the statistical analysis, SAS version 9.2 (SAS Institute, Cary, NC, USA) was used. Logistic regression ~~provided was used to calculate~~ odds ratios (OR) with the presence/absence of ALI as the dependent variable, adjusted for age (in single years) and sex. Since the data were collected as a statistical sample of the Canadian population, the 'weight' option was used in all SAS statistical analyses to make the results representative of the Canadian population from 1994 to 2006 in seven cycles of cross-sectional studies. Weights were provided by Statistics Canada according to their sampling procedures. In order to produce a meaningful estimate of the variance for the weighted results, the weights were adjusted using the formula: [average weight = (sample weight/sum of the sample weights) \* sample size].

In order to determine the characteristics, life style and health status, medical attention and health care utilization as well as activity limitation and disability, which were impacted by ALI, all new injury cases, i.e., those who had not reported an injury in the previous interview were identified. For each new case, data from three cycles were selected, 1) the cycle before reporting, 2) the cycle of reporting, 3) the cycle after reporting. Data for the 1994 cycle were used only in this 'before and after' analysis. Only the first recorded ALI report per person was included. The McNemar test option in SAS was used for matched analysis. This study approved by the research ethics committee of Health Canada.

## RESULTS

The numbers of ALI in ~~adult Canadians~~ the study population increased from 755 cases in 1996 to 1,006 in 2006 (~~not shown in table~~). The weighted prevalence of all ALI increased steadily from 10.5%



1  
2  
3  
4  
5  
6  
7  
8  
9  
10 in 1996 to 12.8% in 2006. ~~The population is showing~~ Those reporting ALI showed increasing trends in  
11 obesity, limited activity, poor health status, medication use, and potential injury sequelae, such as pain,  
12 stress and depression but declining trends in lower income and current smoking (Table 1). The  
13  
14 proportion of injuries which resulted in activity limitations were higher for males, and increased more  
15  
16 over time than for females (Table 2) s. Furthermore, younger adults (20-49 yrs.) were more likely to  
17  
18 report activity limiting injuries (12.2% to 14.0%) compared to older (50+ yrs.) adults (8.6% to  
19  
20 9.8%). Among respondents who reported a ALI, the weighted percentages of who reported five or more  
21  
22 visits to a medical doctor (MD) visits within the previous year decreased from 29.8% in 2000 to  
23  
24 25.3%,% in 2006. emergency department (ED) visits went from 34.0% to 28.8%, and hospital admission  
25  
26 within 48 hours after the injury went from 6.5% to 4.9% from 2000-2006 for all ALI (Table 23). The  
27  
28 rate of hospital admissions within 48 hours for adults aged 50+ years was higher than that of young aged  
29  
30 (20-49) group. Rates of ALI for males were higher and increased more than for females. Furthermore,  
31  
32 younger adults (20-49 yrs.) tended to have more ALI (12.2% to 14.0%) than the older (50+ yrs.) adults  
33  
34 (8.6% to 9.8%) (Table 3).  
35  
36  
37

38 The most frequent types of ALI frequently reported injuries resulting in activity limitation were  
39  
40 sprains and strains (42%), followed by fractures and dislocations (20%), and cuts, punctures and bites  
41  
42 (10%) (Table 4). Only 3.3 to 5.0% of ALI/ALIs were in the category of brain, internal and multiple  
43  
44 injuries. Men tendended to have more cuts, punctures and bites while women havehad more scrapes,  
45  
46 bruises and blisters. Younger ages tendended to have more sprains and strains and older ages more  
47  
48 fractures and dislocations (Table 4).  
49  
50  
51

Formatted: Line spacing: At least 12 pt

1  
2  
3  
4  
5  
6  
7  
8  
9  
10 \_\_\_\_\_ Logistic regression analysis indicated that younger age groups and male participants were more  
11 impacted by ALI, ~~the OR for the 20-39 age group and males is more than for females for most years.~~  
12 Only a few of the other variables ~~show~~showed associations with ALI - immigrants ~~have~~had consistently  
13 lower rates of ALI, while people ~~consuming~~consumed nine or more alcoholic drinks per week ~~have~~had  
14 significantly higher rates. (Table 5).  
15  
16  
17  
18  
19  
20

21 Attributes ~~in the interview cycle before the~~of persons with an ALI were compared ~~with the rates~~  
22 in the ~~interview year with the ALI~~cycles before and ~~rates in the cycle after the ALI~~their injury (Table 6).  
23 ~~Some attributes~~Most behavioural risk factors examined showed ~~higher rates for the cycle with the ALI~~  
24 ~~compared to the previous one, i.e., a pattern of an increase from the~~ two years earlier, and then  
25 ~~continued~~previous to the ~~higher rate in ALI to the next cycle, i.e., time of the ALI to a further increase the~~  
26 two years after the ALI. ~~This~~A similar pattern was ~~true for limited activity, medical doctor (MD) visits,~~  
27 ~~experiencing pain, medication use for pain, sedatives/ tranquilizers, and antidepressants for the patients~~  
28 ~~with stress and depression (P<0.001)~~observed for health status and interactions with the health care  
29 ~~system.~~ (Table 6).  
30  
31  
32  
33  
34  
35  
36  
37  
38  
39

## 40 DISCUSSION

41 ~~Clearly, the impact of ALI can be found~~Based on several different levels. ~~Immediate~~  
42 ~~consequences were experienced by the NPHS data,~~ more than 10% of the ~~adult~~ Canadian population  
43 ~~who~~ annually ~~report~~experience an ALI, with ~~rates~~the proportion increasing from 10.5% in 1996 to  
44 12.8% in 2006. According to the definition of ALI as activity-limiting injuries, all people with ALI  
45 ~~experience~~experienced a certain amount of disruption of their daily activities with the impact varying  
46  
47  
48  
49  
50  
51

Formatted: Font: Bold

Formatted: Line spacing: At least 12 pt

1  
2  
3  
4  
5  
6  
7  
8  
9  
10 according to the type and severity of their injury and depending on their customary type of activity [~~16-~~  
11 ~~19]. The most severe injury includes the 3-6% of ALI with brain, internal and multiple injuries. 22].~~  
12  
13 About 20% of ~~ALI~~ ALIs were fractures and dislocations, many of whom ~~neessitate~~ necessitated a period  
14 of altered activity. ~~The elderly~~ Older people ~~are~~ were more likely to ~~experience~~ report fractures than the  
15 younger age groups. The most common injuries ~~are~~ were sprains and strains, the impact of which also  
16 ~~varies~~ varied a great deal depending on type and severity [~~20-21]. Groups most impacted by ALI were~~  
17 ~~men and the younger ages, and thus more likely to have their busy schedules and possibly income, as~~  
18 ~~well as that of their families disrupted. A widespread~~ 23-24]. An important impact of injuries is on the  
19 workplace through absenteeism and on the family through the disruption of customary activities- [~~25-~~  
20 26]. Besides the impact of injuries on every day activities, there ~~is~~ was also the impact on the health care  
21 system- ~~About~~ [27]. In our data, in 2000, about two thirds of people with ALI sought some kind of  
22 medical care ~~in the year 2000~~. Evidence was presented showing that the impact of ALI might be even  
23 more far-reaching, as seen by the higher levels of medical care, and continued pain remaining two years  
24 after the ALI were reported.

25  
26  
27  
28  
29  
30  
31  
32  
33  
34  
35  
36  
37  
38 Other ~~researches~~ research on injuries ~~have~~ has used a variety of definition of injuries, based on  
39 different sources of information. Questions in the NPHS were able to put these other measures in  
40 perspective ~~when compared to ALI~~. For example, some studies ~~use~~ used hospital-based data [~~22~~ 28], but  
41 the present study ~~shows~~ showed that only about 5% of ALI ~~are admitted to~~ were resulted in a hospital  
42 admission within the first 48 hours ~~of~~ after the event. Assuming that all injuries that ~~require~~ required  
43 hospitalization ~~are~~ were within the activity-limiting rubric, it is clear that studies ~~done on~~ using only  
44 hospital data would include only a small portion of important injuries [~~23~~ 29]. However, the hospitalized  
45  
46  
47  
48  
49  
50  
51

1  
2  
3  
4  
5  
6  
7  
8  
9  
10 injuries will be the more severe injuries which ~~take~~are responsible for a disproportional share of the  
11 health care cost and disability [~~22~~25]. Other studies have used ED visits as a unit of measurement [~~6~~9].  
12  
13 The present study showed less than one third of ALI went to an ED to obtain treatment. Again, the latter  
14 ~~are~~were the more severe injuries or those needing specialized treatment, e.g., casts on fractures, and  
15 thus ~~have~~had a greater impact on daily life and cost. Another source of data commonly used has been  
16 mortality data. Although deaths are definitely activity-limiting, obviously, none ~~are~~were included in this  
17 study. ~~Mortality rates will also refer to a quite~~Fatal injuries reflect a different range of injuries than  
18 ~~those for~~ALI. For example, in an US study, firearm-related injuries were 22% of all injury deaths,  
19 second only to traffic accident related injuries, but firearms amounted to less than 1% for non-fatal  
20 injuries [~~8~~11]. Thus, different measuring units for measuring injury rates will target different slices of  
21 the spectrum of injuries and provide different results. ALI are of special public health importance, but  
22 ~~are~~not sufficiently studied.

23  
24  
25  
26  
27  
28  
29  
30  
31  
32  
33  
34 Another level of impact resulting from ALI would consist of impact ~~on~~on the health care  
35 system. Approximately 60% of people with ALI ~~obtain~~obtained medical care of some type. Of these,  
36 approximately one third of persons with ALI went to ED to experience the often long wait before  
37 receiving treatment. Back at home the patient would not only experience the pain and disability of the  
38 ALI, but also the need to negotiate the health care system, such as making appointments with  
39 physicians, specialists, physiotherapists, etc., finding transportation, often needing someone to  
40 accompany them [~~24-27~~30-33]. Even though the proportion of the population with ALI increased over  
41 the years 2000-2006, decreases were seen in use of primary care and the hospital ED visits as well as  
42 hospitalisation. This decrease in health care use could be an indication either of greater difficulty in  
43  
44  
45  
46  
47  
48  
49  
50  
51

1  
2  
3  
4  
5  
6  
7  
8  
9  
10 accessing health care, or ~~that the ALI reported becoming less severe~~nature of ALIs has moderated over  
11 the years. Berdahl found variation by ethnic group and sex, both in the reporting of work-related  
12 injuries and in the seeking of medical care and the change in ethnic composition over the years could  
13 also be a factor in the NPHS data [~~28-30~~34-36]. In any case, ALI are suffered by a large proportion of  
14 the population annually, and a majority of these seek medical treatment whether primary care, ED or  
15 hospital care. ~~Some of these would need an ambulance for transportation.~~ Clearly, this entails a large  
16 cost to the health care system and any prevention would not only improve quality of life of the putative  
17 victims but also would result in significantly lower health care costs.  
18  
19  
20  
21  
22  
23  
24

25  
26  
27 Another type of impact would be long-term changes after the injury. The 'before and after' data  
28 available in the NPHS consisted of comparing the cross-sectional data from the interview cycle before  
29 the ALI with the data of the cycle reporting the ALI and with the next cycle after the ALI. While the  
30 interviews for each respondent could be linked for the 'before and after' cycles it was more difficult to  
31 determine which changes in attributes in the year of the ALI or subsequent years were sequela of the  
32 ALI. For example, it might make sense that the increasing obesity for people with ALI be linked to  
33 after-effects, e.g. [~~34~~37], due to inactivity resulting from the ALI but, in fact, similar changes ~~are~~were  
34 happening in the overall population. Given these caveats, we can note that no changes were found for  
35 smoking and little change in excessive alcohol use. Most likely to show long-term effects due to ALI  
36 were visits to medical doctors and ongoing pain. People with ALI showed increasing likelihood of  
37 visiting a MD at least five times during the year which ~~continued~~continued for the subsequent cycle.  
38 Similarly pain increased in the cycle with the ALI and remained high over the years. Although this is  
39 weak evidence, it confirms work on long-term effects of other researchers [~~32-33~~38-39] and again  
40  
41  
42  
43  
44  
45  
46  
47  
48  
49  
50  
51

1  
2  
3  
4  
5  
6  
7  
8  
9  
10 emphasizes the impact of ALI in the population.

11  
12  
13 Injuries have been found to lead to lost productivity, medical costs, compensation ~~costs~~ and  
14 ~~possibly~~ long-term health problems and disability [~~34-36~~40-42], which was confirmed by the present  
15 results for the Canadian population. Many injuries can be prevented and a better understanding of all  
16 aspects of injuries will lead to better ways of prevention or the minimizing of their effects. However,  
17 collaboration and cooperation is needed [~~37~~43]. The European Union has committed itself to reducing  
18 number of traffic fatalities from ~~450~~45,000 to ~~235~~25,000 by 2010, which as ~~Goule et al., several reports,~~  
19 point out, will require strong measures against use of alcohol [~~38-41~~,44-47] and illicit and medicinal  
20 drugs before driving [~~42~~48]. A difficulty in injury prevention is the multi-faceted aspect of injuries. For  
21 example, a fall may have many causes, such as unsafe working conditions or slippery stairs at home.  
22 Each of these issues would require different approaches to prevention. Similar diversities are found for  
23 most other types of injuries. With all difficulties inherent in devising effective interventions, prevention  
24 is still the best approach to lower the tremendous impact of ALI on the Canadian population.  
25  
26  
27  
28  
29  
30  
31  
32  
33  
34  
35  
36  
37

38 The NPHS data have important strengths, such as its representativeness of the Canadian  
39 population and its longitudinal nature. Because of the longitudinal design, it was possible to identify  
40 new ALI, meaning no ALI in the previous interview, and compare risk factors before and after the event,  
41 as well as its consequences. The 'before and after' comparisons of the same person allowed for matched  
42 analysis at different times. Important also is the extensive and consistent information available on each  
43 respondent over the multiple cycles of the survey, such as type of ALI, and the medical care needed.  
44 Besides strengths, the NPHS also has limitations. ~~In spite of the abundance of data available, further~~  
45  
46  
47  
48  
49  
50  
51

1  
2  
3  
4  
5  
6  
7  
8  
9  
10 ~~information is always desirable for particular uses of the data.~~ One issue is the lack of distinction  
11 between intentional and unintentional injuries, ~~another is the large time spans over which the~~  
12 ~~information is available.~~ Another issue is that of self-reported data. Part of self-reporting is recall of  
13 events. Recall of having had an ALI has been shown elsewhere to be less accurate with increasing time  
14 and is also likely to vary with the severity of the injury [43-44,49-50]. Both of these would likely lead  
15 to an under-reporting of ALI. In spite of its limitations the NPHS gives an invaluable view of the level  
16 of serious injury in the Canadian adult population over a 12 year time period.  
17  
18  
19  
20  
21  
22  
23  
24

25 Another strength of these data is the use of ALI as a measurement of injury. There are various  
26 units of measurement in measuring rates of injury in a population. The unit of measurement used in the  
27 present study consists of the most serious ALI over the previous 12 months, excluding repetitive strains  
28 injuries. The use of ALI means the delimitation of a particular kind of injury in the spectrum of injuries  
29 as a concept meaningful to both respondent and researchers. In addition, it identifies a type of injury  
30 sufficiently severe to impact a person's regular routine.  
31  
32  
33  
34  
35  
36  
37

## 38 CONCLUSION

39  
40 The findings from this study quantified the immediate and long term impact of individuals and  
41 population level injuries in Canada. The immediate impact was pain, disability, and disruption of regular  
42 life. ~~The two thirds seeking medical care needed time, effort and know how to negotiate the health care~~  
43 ~~system, let alone transportation and other related help.~~ Long-term effects in patients were chronic pain  
44 and increased medical doctor's visits remaining two years after the ALI. Population impact included  
45 loss of productivity ~~of 10% of the most productive~~ and a considerable increase in health care access and  
46  
47  
48  
49  
50  
51

1  
2  
3  
4  
5  
6  
7  
8  
9  
10  
11  
12  
13  
14  
15  
16  
17  
18  
19  
20  
21  
22  
23  
24  
25  
26  
27  
28  
29  
30  
31  
32  
33  
34  
35  
36  
37  
38  
39  
40  
41  
42  
43  
44  
45  
46  
47  
48  
49  
50  
51  
52  
53  
54  
55  
56  
57  
58  
59  
60

cost. This study also particularly contributes to injury prevention in social and psychological health services to help injured people make a better recovery and maintain the quality of life after injuries.

For peer review only

**Formatted:** [RefList], Font: Bold, Font color: Auto, English (U.S.)

**Formatted:** Space After: 12 pt, Line spacing: Multiple 1.3 li, Tab stops: 0.25", Right + 0.38", Left + Not at -0.76" + -0.5" + 6.5" + 7" + 7.5" + 8" + 8.5" + 9" + 9.5" + 10" + 10.5" + 11" + 11.5" + 12" + 12.5" + 13"

**Formatted:** Line spacing: At least 12 pt



## REFERENCES

1. Centre for Surveillance Coordination HC. Injury Surveillance in Canada: Current realities and Challenges. Ottawa: 2003; Health Canada.
2. [Holtslag HR, Beeck EF van, Lichtveld RA, et al. Individual and population burdens of major trauma in the Netherlands. \*Bull World Health Organ\* 2008; 86:111–117.](#)
3. [Lyons RA, Kendrick D, Towner EM, et al. Measuring the Population Burden of Injuries—Implications for Global and National Estimates: A Multi-centre Prospective UK Longitudinal Study. \*PLoS Med\* 2011; 8\(12\): e1001140. doi:10.1371/journal.pmed.1001140.](#)
4. [Rivara FP, Thompson RS, Thompson, DC Calonge N. Injuries to Children and Adolescents: Impact on Physical Health. \*Pediatrics\* 1991;88:783-788.](#)
5. Frank JW, Brooker AS, DeMaio S et al. Disability resulting from occupational low back pain part II: What do we know about secondary prevention? A review of the scientific evidence on prevention after disability begins. *Spine*. 1996; 21(24):2918–2929.
6. Krause N, Frank JW, Dasinger LK et al. Determinants of duration of disability and return to work after work-related injury and illness: Challenges for future research. *Am J Indust Ind Med*. 2001; 40:464–484.
7. Krause N, Ragland DR. Occupational disability due to low back pain: A new interdisciplinary classification based on a phase model of disability. *Spine*. 1994;19(9):1011–1020.
8. Verbrugge LM, Jette AM. The disablement process. *Soc Sci Med*. 1994;38(1):1–14.
9. MacPherson AK-, Schull M, Manuel D et al. Injuries in Ontario: ICES Atlas. Toronto: Institute for Clinical Evaluative Sciences 2005;
10. MacKenzie EJ-. Epidemiology of injuries: current trends and future challenges. *Epidemiol Rev*. 2000; 22:-112-9.
11. Schneier AJ, Shields BJ, Hostetler SG et al. Incidence of Pediatric Traumatic Brain Injury and Associated Hospital Resource Utilization in the United States. *Pediatrics*. 2006;-118 (2):483-492.
12. Mayer T, Walker ML, Clark P. Further experience with a modified Abbreviated Injury Severity Scale. *J Trauma*. 1984;-24:31-34.
13. Kraus JF, Fife D, Conroy C. Pediatric brain injuries: the nature, clinical course, and early outcomes in a defined United States' population. *Pediatrics*. 1987;-79:501-507.

Formatted: [RefList], Font color: Auto, English (U.S.)

Formatted: Font: Italic

Formatted: English (U.S.)

Formatted: Adjust space between Latin and Asian text, Adjust space between Asian text and numbers

Formatted: Font: Italic

Formatted: Default Paragraph Font, Font color: Auto, English (U.S.)

Formatted: Default Paragraph Font, Font color: Auto, English (U.S.)

Formatted: Default Paragraph Font, Font color: Auto, English (U.S.)

Formatted: Font: Italic

Formatted: Font: Italic

Formatted: Font: Italic

Formatted: Line spacing: At least 12 pt

1  
2  
3  
4  
5  
6  
7  
8  
9  
10 ~~414~~. Casey R, Ludwig S, McCormick MC. Morbidity following minor head trauma in children.  
11 Pediatrics. 1986;78:497-502.

12 ~~4215~~. Kraus JP, Fife D, Cox P et al. Incidence, severity and external causes of pediatric brain injury.  
13 AJDC. 1986;140:687-693.

14 ~~4316~~. Rivara FP, Calonge N, and Thompson R. Population-Based Study of Unintentional Injury  
15 Incidence and Impact during Childhood. Am J Public Health. 1989;79:990-994.

16 ~~4417~~. Tambay J-L, Catlin G. Sample design of the National Population Health Survey. Health Reports  
17 (Statistics Canada, Catalogue 82-003). 2006;7(1):29-38.

18 ~~4518~~. World Health Organization. What are overweight and obesity? Factsheet 2006; N° 311.

19 ~~4619~~. Majori S, Ricci G, Capretta F et al. Epidemiology of domestic injuries. A survey in an emergency  
20 department in North-East Italy. J Prev Med Hyg. 2009;50:164-9.

21 ~~4720~~. Scheiman S, Moghaddas HS, Bjornstig U et al. Bicycle injury events among older adults in  
22 Northern Sweden: a 10-year population based study. Accid Anal Prev. 2010;42:758-63.

23 ~~4821~~. Ahmed LA, Schirmer H, Bjornerem A et al. The gender- and age-specific 10-year and lifetime  
24 absolute fracture risk in Tromso, Norway. Eur J Epidemiol. 2009;24:441-8.

25 ~~4922~~. Ahmed LA, Emaus N, Berntsen GK, et al. Bone loss and the risk of non-vertebral fractures in  
26 women and men: the Tromso study. Osteoporos Int. 2010;21: 1503-11.

27 ~~2023~~. Aschkenasy MT, Rothenhaus TC. Trauma and falls in the elderly. Emerg Med Clin North Am.  
28 2006; 24:413-32.

29 ~~2124~~. Wilkins K. Medications and fall-related fractures in the elderly. Health Rep. 1999;11:45-53.

30 ~~2225~~. Kendrick D, Vinogradova Y, Coupland C, et al. Getting back to work after injury: the UK Burden  
31 of Injury multicentre longitudinal study. BMC Public Health 2012;1 (12):584.

32 ~~26~~. Kendrick D, Vinogradova Y, Coupland C, et al. Making a successful return to work: the UK burden  
33 of injury multicentre longitudinal study. Br J Gen Pract 2012 Feb; 62(595):e82-  
34 90.10.3399/bjgp12X625139.

35 ~~27~~. Franche RL, Krause N. Readiness for Return to Work Following Injury or Illness: Conceptualizing  
36 the Interpersonal Impact of Health Care, Workplace, and Insurance Factors. JOccup Rehabil 2002;  
37 December 12 (4):233-256.

38 ~~28~~. Frisina PG, Guellnitz R, Alverzo J. A time series analysis of falls and injury in the inpatient  
39 rehabilitation setting. Rehabil Nurs. 2010;35:141-6.

Formatted: Font: Italic

Formatted: Line spacing: At least 12 pt

2329. Pickett W, Hartling L, Brison RJ. A population-based study of hospitalized injuries in Kingston, Ontario, identified via the Canadian Hospitals Injury Reporting and Prevention Program. *Chronic Dis Can*. 1997;18:61-9.

Formatted: Font: Italic

2430. Dryden DM, Saunders LD, Rowe BH et al. Utilization of health services following spinal cord injury: a 6-year follow-up study. *Spinal Cord*. 2004; 42:513-525.

Formatted: Font: Italic

2531. Brown JA, Shannon HS, McDonough P et al. Healthcare Use of Families of Injured Workers Before and After a Workplace Injury in British Columbia, Canada. *Healthcare Policy*. 2007; 2(3):1-124.

Formatted: Font: Italic, English (Canada)

Formatted: Default Paragraph Font, Font color: Auto, English (Canada)

2632. Berthelot J-M and the Project Team. Injury hospitalizations and socio-economic status. Ottawa, Ontario: 2010; CIHI.

2733. Compston J. Osteoporosis: social and economic impact. *Radiol Clin North Am*. 2010;48:477-82.

Formatted: Font: Italic

2834. Berdahl TA, Zodet M. Medical care utilization for work-related injuries in the United States 2002-2006. *Med Care*. 2010;48:645-51.

Formatted: Font: Italic

2935. de Castro AB, Fujishiro K, Rue T et al. Associations between work schedule characteristics and occupational injury and illness. *Int Nurs Rev*. 2010;57:188-94.

Formatted: Font: Italic

3036. Lombardi DA, Folkard S, Willetts JL et al. Daily sleep, weekly working hours, and risk of work-related injury: US National Health Interview Survey (2004-2008). *Chronobiol Int*. 2010;27(5):1013-30.

Formatted: Font: Italic, French (Canada)

Formatted: French (Canada)

3137. Bergkvist D, Hekmat K, Svensson T, et al. Obesity in orthopedic patients. *Surg Obes Relat Dis*. 2009; 5:670-2.

Formatted: Font: Italic

3238. Cameron CM, Kliewer EV, Purdie DM et al. Long term health outcomes after injury in working age adults: a systematic review. *J Epidemiol Community Health*. 2006;60:341-4.

Formatted: Font: Italic

Formatted: Font: Italic

3339. Toft AM, Moller H, Laursen B. The years after an injury: long-term consequences of injury on self-rated health. *J Trauma*. 2010;69:26-30.

Formatted: Font: Italic

3440. Borgstrom F, Zethraeus N, Johnell O, et al. Costs and quality of life associated with osteoporosis-related fractures in Sweden. *Osteoporos Int*. 2006;17:637-50.

Formatted: Font: Italic

3541. Brainsky A, Glick H, Lydick E, et al. The economic cost of hip fractures in community-dwelling older adults: a prospective study. *J Am Geriatr Soc*. 1997;45:281-7.

Formatted: Font: Italic

3642. Hendrie D, Hall SE, Arena G et al. Health system costs of falls of older adults in Western Australia. *Aust Health Rev*. 2004; 28:363-73.

Formatted: Font: Italic

3743. Sleet DA, Moffett DB. Framing the problem: injuries and public health. *Fam Community Health*. 2009;32:88-97.

Formatted: Font: Italic

Formatted: Line spacing: At least 12 pt

1  
2  
3  
4  
5  
6  
7  
8  
9  
10  
11  
12  
13  
14  
15  
16  
17  
18  
19  
20  
21  
22  
23  
24  
25  
26  
27  
28  
29  
30  
31  
32  
33  
34  
35  
36  
37  
38  
39  
40  
41  
42  
43  
44  
45  
46  
47  
48  
49  
50  
51  
52  
53  
54  
55  
56  
57  
58  
59  
60

3844. Desapriya E, Pike I, Raina P. Severity of alcohol-related motor vehicle crashes in British Columbia: case - control study. *Int J Contr Saf Promot*. 2006;-13:-89-94.

Formatted: Font: Italic

3945. Kool B, Ameratunga S, Robinson E et al. The contribution of alcohol to falls at home among working-aged adults. *Alcohol*. 2008;-42:-383-8.

Formatted: Font: Italic

4046. Kool B, Ameratunga S, Jackson R. The role of alcohol in unintentional falls among young and middle-aged adults: a systematic review of epidemiological studies. *Inj Prev*. 2009; 15:-341-7.

Formatted: Font: Italic

4147. Ahlm K, Bjornstig U, Ostrom M. Alcohol and drugs in fatally and non-fatally injured motor vehicle drivers in northern Sweden. *Accid Anal Prev*. 2009; 41:129-36.

Formatted: Font: Italic

4248. Gouille JP, Verstraete A, Boulu R, et al. Illicit drugs, medications and traffic accidents. *Ann Pharm Fr*. 2008;-66:-196-205.

Formatted: Font: Italic

Formatted: Font: Italic

4349. Wilkins K, Mackenzie SG. Work injuries. *Health Rep*. 2007;-18:-25-42.

Formatted: Font: Italic

4450. Warner M, Schenker N, Heinen MA et al. The effects of recall on reporting injury and poisoning episodes in the National Health Interview Survey. *Inj Prev*. 2005;-11:-282-7.

Formatted: Font: Italic

Formatted: Default Paragraph Font, Font color: Auto

Formatted: Line spacing: single

Formatted: Line spacing: At least 12 pt

**Table 1: Weighted percentages The estimated percent of characteristics of ALI for which were impacted adult Canadians reporting an activity limiting injury in the previous year based on the study population, NPHS, Canada, 1994 data, 1996-2006**

| Year                                                   | 1996             | 1998             | 2000                 | 2002             | 2004             | 2006             |
|--------------------------------------------------------|------------------|------------------|----------------------|------------------|------------------|------------------|
|                                                        | wt% <sup>+</sup> | wt% <sup>+</sup> | wt% <sup>+</sup>     | wt% <sup>+</sup> | wt% <sup>+</sup> | wt% <sup>+</sup> |
| Total Number <sup>2</sup>                              | 7,313            | 7,529            | 7,717                | 7,875            | 8,085            | 8,324            |
| ALI (wt%) <u>All</u>                                   | 10.5             | 10.9             | 11.4                 | 12.6             | 12.6             | 12.8             |
| <b>Background variables</b>                            |                  |                  |                      |                  |                  |                  |
| Partner <u>Married/common law</u>                      | 71.0             | 69.3             | 68.2                 | 66.2             | 65.7             | 64.7             |
| Low income                                             | 40.0             | 34.2             | 27.9                 | 26.0             | 23.5             | 19.8             |
| Completed High School                                  | 89.6             | 89.9             | 89.3                 | 84.7             | 84.5             | 84.5             |
| Rural                                                  | 17.9             | 20.5             | 21.0                 | 20.6             | 19.9             | 22.0             |
| Immigrant                                              | 17.5             | 17.3             | 16.8                 | 16.2             | 16.1             | 15.7             |
| <b>Health related variables</b>                        |                  |                  |                      |                  |                  |                  |
| Current smoking                                        | 22.7             | 21.3             | 20.4                 | 17.1             | 17.1             | 16.0             |
| Inactive                                               | 58.3             | 52.9             | 56.1                 | 48.3             | 51.0             | 45.9             |
| Obese                                                  | 18.4             | 21.2             | 23.0                 | 24.3             | 25.0             | 26.4             |
| 9+ alcohol drinks/ week                                | 11.0             | 11.6             | 11.9                 | 11.8             | 11.6             | 14.8             |
| <b>Region of residence</b>                             |                  |                  |                      |                  |                  |                  |
| Atlantic                                               | 8.8              | 8.7              | 8.9                  | 8.8              | 8.7              | 8.7              |
| Quebec                                                 | 25.5             | 25.6             | 25.9                 | 26.0             | 26.1             | 25.9             |
| Ontario                                                | 36.3             | 36.0             | 36.0                 | 35.8             | 36.1             | 36.2             |
| Prairies                                               | 17.0             | 17.3             | 17.1                 | 17.4             | 17.3             | 17.4             |
| BC                                                     | 12.5             | 12.4             | 12.1                 | 12.0             | 11.8             | 11.9             |
| <b>Outcome-related</b>                                 |                  |                  |                      |                  |                  |                  |
| <del>Limit</del> Limited activity                      | 17.3             | 17.8             | <del>17.9</del> 18.0 | 22.9             | 24.5             | 26.6             |
| <del>Health</del> Poor health status                   | 33.6             | 33.2             | 38.0                 | 41.2             | 42.3             | 43.5             |
| 5+ Medical Doctor visits /year                         | 24.2             | 26.3             | 26.6                 | 27.6             | 28.3             | 26.8             |
| Pain                                                   | 12.3             | 13.7             | 13.3                 | 15.1             | 16.4             | 15.8             |
| Stress                                                 | 26.3             | 29.2             | 25.0                 | 27.3             | 28.3             | 27.4             |
| Depression                                             | 6.1              | 5.8              | 6.4                  | 6.9              | 7.1              | 6.0              |
| <b>Medication use in last 30 <del>years</del> days</b> |                  |                  |                      |                  |                  |                  |
| Pain medication                                        | 65.6             | 67.5             | 70.1                 | 70.2             | 70.4             | 70.6             |
| Tranquilizer/ sedative                                 | 5.1              | 5.3              | 6.8                  | 8.1              | 8.2              | 10.0             |
| Antidepressants                                        | 3.6              | 4.4              | 5.4                  | 5.9              | 6.9              | 7.0              |

<sup>+</sup> wt% Weighted percentages

Formatted Table

Formatted Table

Inserted Cells

Inserted Cells

Inserted Cells

Inserted Cells

Inserted Cells

Formatted: Line spacing: At least 12 pt

1  
2  
3  
4  
5  
6  
7  
8  
9  
10  
11  
12  
13  
14  
15  
16  
17  
18  
19  
20  
21  
22  
23  
24  
25  
26  
27  
28  
29  
30  
31  
32  
33  
34  
35  
36  
37  
38  
39  
40  
41  
42  
43  
44  
45  
46  
47  
48  
49  
50  
51  
52  
53  
54  
55  
56  
57  
58  
59  
60

making rates representative of the Canadian population

<sup>2</sup>Number in study population

|                                 |              |              |              |              |              |              |
|---------------------------------|--------------|--------------|--------------|--------------|--------------|--------------|
| <u>Total Number<sup>1</sup></u> | <u>7,313</u> | <u>7,529</u> | <u>7,717</u> | <u>7,875</u> | <u>8,085</u> | <u>8,324</u> |
|---------------------------------|--------------|--------------|--------------|--------------|--------------|--------------|

<sup>1</sup> total number of survey respondents used to calculate weighted percentages representative of the Canadian population

For peer review only

Formatted: Line spacing: At least 12 pt

**Table 2: Percent3: The percent of persons with ALI for which were impacted on medical attention and reporting specific health care resource utilization use among those reporting an ALI by age group and sex groups, NPHS, Canada, 19942000-2006\***

| Year      |                                      | 2000<br>wt% <sup>†</sup> | 2002<br>wt% <sup>†</sup> | 2004<br>wt% <sup>†</sup> | 2006<br>wt% <sup>†</sup> |
|-----------|--------------------------------------|--------------------------|--------------------------|--------------------------|--------------------------|
| All       | Number of ALI                        | 865                      | 932                      | 913                      | 1,005                    |
|           | <del>None</del>                      | <del>33.5</del>          | <del>40.1</del>          | <del>38.5</del>          | <del>40.7</del>          |
|           | Medical Doctor (MD) visits (5+/year) | 29.8                     | 27.1                     | 27.3                     | 25.3                     |
|           | Emergency Department (ED) visits     | 34.0                     | 28.5                     | 31.0                     | 28.8                     |
|           | Hospital admission in 48 hours       | 6.5                      | 5.4                      | 5.5                      | 4.9                      |
|           | Other                                | 2.7                      | 4.3                      | 3.1                      | 5.2                      |
|           | Any                                  | 66.6                     | 60.0                     | 61.5                     | 59.3                     |
| Males     | <del>None</del>                      | <del>33.5</del>          | <del>40.1</del>          | <del>38.5</del>          | <del>40.7</del>          |
|           | Number of ALI                        | 394                      | 460                      | 463                      | 482                      |
|           | <del>None</del>                      | <del>34.8</del>          | <del>42.2</del>          | <del>41.6</del>          | <del>41.5</del>          |
|           | MD visits (5+/year)                  | 26.6                     | 26.5                     | 24.7                     | 23.6                     |
|           | ED visits                            | 34.5                     | 27.4                     | 30.8                     | 29.7                     |
|           | Hospital admission in 48 hours       | 9.5                      | 4.5                      | 4.6                      | 4.1                      |
|           | Other                                | 4.1                      | 4.0                      | 2.9                      | 5.3                      |
| Females   | Any                                  | 65.2                     | 57.8                     | 58.4                     | 58.5                     |
|           | <del>None</del>                      | <del>34.8</del>          | <del>42.2</del>          | <del>41.6</del>          | <del>41.5</del>          |
|           | Number of ALI                        | 471                      | 472                      | 450                      | 523                      |
|           | <del>None</del>                      | <del>32.3</del>          | <del>37.6</del>          | <del>34.8</del>          | <del>39.7</del>          |
|           | MD visits (5+/year)                  | 32.6                     | 27.7                     | 30.5                     | 27.3                     |
|           | ED visits                            | 33.6                     | 29.9                     | 31.3                     | 27.8                     |
|           | Hospital admission in 48 hours       | 4.0                      | 6.4                      | 6.6                      | 5.7                      |
| Age 20-49 | Other                                | 1.5                      | 4.7                      | 3.4                      | 5.1                      |
|           | Any                                  | 67.7                     | 62.4                     | 65.2                     | 60.2                     |
|           | <del>None</del>                      | <del>32.3</del>          | <del>37.6</del>          | <del>34.8</del>          | <del>39.7</del>          |
|           | Number of ALI                        | 588                      | 601                      | 564                      | 590                      |
|           | <del>None</del>                      | <del>34.2</del>          | <del>40.7</del>          | <del>39.7</del>          | <del>41.1</del>          |
|           | MD visits (5+/year)                  | 29.1                     | 27.7                     | 28.5                     | 24.3                     |
|           | ED visits                            | 34.3                     | 27.6                     | 28.7                     | 27.3                     |
| Age 50+   | Hospital admission in 48 hours       | 6.2                      | 4.1                      | 2.9                      | 3.6                      |
|           | Other                                | 2.5                      | 4.1                      | 3.1                      | 7.3                      |
|           | Any                                  | 65.8                     | 59.3                     | 3.2                      | 58.9                     |
|           | <del>None</del>                      | <del>34.2</del>          | <del>40.7</del>          | <del>39.7</del>          | <del>41.1</del>          |
|           | Number of ALI                        | 277                      | 331                      | 349                      | 415                      |
|           | <del>None</del>                      | <del>31.8</del>          | <del>38.6</del>          | <del>36.6</del>          | <del>40.1</del>          |
|           | MD visits (5+/year)                  | 31.5                     | 25.8                     | 25.3                     | 26.9                     |
| ED visits | 33.6                                 | 30.6                     | 34.9                     | 31.1                     |                          |

1  
2  
3  
4  
5  
6  
7  
8  
9  
10  
11  
12  
13  
14  
15  
16  
17  
18  
19  
20  
21  
22  
23  
24  
25  
26  
27  
28  
29  
30  
31  
32  
33  
34  
35  
36  
37  
38  
39  
40  
41  
42  
43  
44  
45  
46  
47  
48  
49  
50  
51  
52  
53  
54  
55  
56  
57  
58  
59  
60

|                                |      |      |      |      |
|--------------------------------|------|------|------|------|
| Hospital admission in 48 hours | 7.3  | 8.1  | 9.9  | 6.9  |
| Other                          | 3.2  | 4.9  | 3.2  | 1.9  |
| Any                            | 61.4 | 59.3 | 63.5 | 59.9 |

31.8    38.6    36.6

\* Data on medical treatment was available only from 2000-2006

wt%+  
Weighted percentages making rates representative of the Canadian population 40.1

None

Inserted Cells

Inserted Cells

Inserted Cells

Formatted: Right

Inserted Cells

Inserted Cells

Formatted: Line spacing: At least 12 pt

For peer review only



**Table 32: Percentages for ALI for which were impacted by activity limitation per year, NPHS, Canada, 2000-2006\***

| Years                    |                                                              | 2000                   | 2002                   | 2004                   | 2006                   |
|--------------------------|--------------------------------------------------------------|------------------------|------------------------|------------------------|------------------------|
|                          | <b>-Injury status</b>                                        | <b>wt%<sup>+</sup></b> | <b>wt%<sup>+</sup></b> | <b>wt%<sup>+</sup></b> | <b>wt%<sup>+</sup></b> |
| <b>All</b>               | None                                                         | 85.5                   | 84.0                   | 84.0                   | 82.2                   |
|                          | Activity limiting <u>only(yes)</u>                           | 10.8                   | 12.1                   | 11.6                   | 12.0                   |
|                          | <del>Non-activity</del> <u>Activity</u> limiting <u>(no)</u> | 3.1                    | 3.0                    | 3.5                    | 5.1                    |
|                          | Both                                                         | 0.6                    | 0.4                    | 1.0                    | 0.8                    |
| <b>Males</b>             | None                                                         | 84.9                   | 82.0                   | 82.2                   | 80.1                   |
|                          | Activity limiting <u>only(yes)</u>                           | 10.5                   | 13.5                   | 13.2                   | 13.2                   |
|                          | <del>Non-activity</del> <u>Activity</u> limiting <u>(no)</u> | 3.9                    | 3.9                    | 3.4                    | 5.6                    |
|                          | Both                                                         | 0.7                    | 0.7                    | 1.3                    | 1.1                    |
| <b>Females</b>           | None                                                         | 86.0                   | 85.8                   | 85.7                   | 84.1                   |
|                          | Activity limiting <u>only(yes)</u>                           | 11.1                   | 10.8                   | 10.1                   | 10.9                   |
|                          | <del>Non-activity</del> <u>Activity</u> limiting <u>(no)</u> | 2.4                    | 3.0                    | 3.6                    | 4.6                    |
|                          | Both                                                         | 0.5                    | 0.4                    | 0.7                    | 0.5                    |
| <b>Ages <u>20-49</u></b> | None                                                         | 83.5                   | 81.7                   | 81.2                   | 79.3                   |
|                          | Activity limiting <u>only(yes)</u>                           | 12.2                   | 13.9                   | 13.3                   | 14.0                   |
|                          | <del>Non-activity</del> <u>Activity</u> limiting <u>(no)</u> | 3.5                    | 3.7                    | 4.3                    | 5.8                    |
|                          | Both                                                         | 0.8                    | 0.7                    | 1.3                    | 0.9                    |
| <b>Ages <u>50+</u></b>   | None                                                         | 88.5                   | 87.2                   | 87.4                   | 85.3                   |
|                          | Activity limiting <u>(yes)</u>                               | 8.6                    | 9.5                    | 9.5                    | 9.8                    |
|                          | <del>Non-activity</del> <u>Activity</u> limiting <u>(no)</u> | 2.6                    | 3.1                    | 2.5                    | 4.2                    |
|                          | Both                                                         | 0.3                    | 0.3                    | 0.6                    | 0.6                    |

\* Data on medical treatment was available only from 2000-2006

<sup>+</sup>wt% - Weighted percentages making rates representative of the Canadian population

Formatted Table

Formatted: Line spacing: At least 12 pt

**Table 4: The pathology type of activity-limiting injury as a proportion of all activity-limiting injuries ALI for which were impacted on patients' ED visits, admission and length of stay in hospital and consequence, NPHS, Canada, 1994-1996-2006**

|                | Interview cycles           | 1996             | 1998             | 2000             | 2002             | 2004             | 2006             |
|----------------|----------------------------|------------------|------------------|------------------|------------------|------------------|------------------|
| N <sup>2</sup> | Number of ALI              | 755              | 786              | 865              | 931              | 911              | 1,006            |
|                | <b>Patterns of ALI</b>     | <sup>1</sup> wt% |
| ALL            | Brain, internal, multiple  | 4.9              | 3.3              | 5.8              | 3.2              | 3.9              | 4.3              |
|                | Fractures/dislocation      | 20.6             | 21.2             | 19.9             | 20.3             | 22.2             | 24.9             |
|                | Burns                      | 5.3              | 3.3              | 4.3              | 2.8              | 4.3              | 3.7              |
|                | Sprains, strains           | 42.0             | 42.3             | 42.4             | 47.3             | 42.8             | 42.2             |
|                | Cuts, punctures, bites     | 10.2             | 15.5             | 11.8             | 11.6             | 11.1             | 9.7              |
|                | Scrapes, bruises, blisters | 7.7              | 6.9              | 7.8              | 4.8              | 7.1              | 6.3              |
|                | Other                      | 9.3              | 7.5              | 8.0              | 10.0             | 8.6              | 8.9              |
|                | Total                      | 100.0            | 100.0            | 100.0            | 100.0            | 100.0            | 100.0            |
| Males          | Brain, internal, multiple  | 5.4              | 2.8              | 5.0              | 2.4              | 4.1              | 4.5              |
|                | Fractures/dislocation      | 21.3             | 21.5             | 21.5             | 20.3             | 21.0             | 26.1             |
|                | Burns                      | 5.8              | 2.4              | 3.9              | 3.5              | 4.6              | 2.7              |
|                | Sprains, strains           | 39.6             | 42.6             | 40.5             | 47.2             | 41.7             | 39.8             |
|                | Cuts, punctures, bites     | 12.2             | 17.4             | 16.7             | 13.9             | 13.6             | 13.1             |
|                | Scrapes, bruises, blisters | 6.2              | 5.2              | 5.7              | 4.4              | 6.2              | 5.8              |
|                | Other                      | 9.5              | 8.1              | 6.7              | 8.3              | 8.8              | 8.0              |
| Females        | Brain, internal, multiple  | 4.3              | 3.9              | 6.4              | 3.8              | 3.6              | 4.2              |
|                | Fractures/dislocation      | 19.8             | 21.0             | 18.5             | 21.6             | 23.6             | 23.3             |
|                | Burns                      | 4.5              | 4.1              | 4.7              | 3.6              | 4.0              | 4.8              |
|                | Sprains, strains           | 45.0             | 41.9             | 44.1             | 46.0             | 44.3             | 44.9             |
|                | Cuts, punctures, bites     | 7.8              | 13.3             | 7.7              | 9.1              | 7.9              | 6.0              |
|                | Scrapes, bruises, blisters | 9.5              | 8.9              | 9.5              | 6.4              | 8.2              | 7.0              |
|                | Other                      | 9.1              | 6.9              | 9.1              | 9.5              | 8.4              | 9.8              |
| Age 20-49      | Brain, internal, multiple  | 4.8              | 3.3              | 4.9              | 3.1              | 3.7              | 3.0              |
|                | Fractures/dislocation      | 17.4             | 19.8             | 22.5             | 17.4             | 18.2             | 22.9             |
|                | Burns                      | 5.5              | 3.3              | 4.1              | 3.5              | 5.0              | 4.8              |
|                | Sprains, strains           | 43.8             | 47.2             | 42.8             | 51.3             | 50.9             | 46.3             |
|                | Cuts, punctures, bites     | 10.9             | 15.5             | 11.5             | 10.7             | 9.4              | 9.4              |

Formatted Table

Formatted: Line spacing: At least 12 pt

|    |                                   |      |      |      |      |      |      |
|----|-----------------------------------|------|------|------|------|------|------|
| 10 | Scrapes, bruises, blisters        | 8.5  | 5.0  | 7.5  | 4.5  | 4.4  | 4.6  |
| 11 | Other                             | 9.1  | 5.9  | 6.7  | 9.5  | 8.4  | 9.0  |
| 12 | Age 50+ Brain, internal, multiple | 5.4  | 3.4  | 7.6  | 3.4  | 4.2  | 6.3  |
| 13 | Fractures/dislocation             | 30.8 | 24.9 | 13.8 | 26.4 | 29.0 | 27.9 |
| 14 | Burns                             | 4.3  | 3.0  | 4.9  | 1.4  | 3.3  | 1.9  |
| 15 | Sprains, strains                  | 36.2 | 30.2 | 41.7 | 39.0 | 29.1 | 35.8 |
| 16 | Cuts, punctures, bites            | 8.1  | 15.2 | 12.5 | 13.4 | 13.7 | 10.3 |
| 17 | Scrapes, bruises, blisters        | 5.1  | 11.7 | 8.5  | 5.4  | 11.7 | 9.1  |
| 18 | Other                             | 10.1 | 11.6 | 11.0 | 11.0 | 9.0  | 8.7  |

<sup>1</sup> wt%--Weighted percentages making rates representative of the Canadian population

<sup>2</sup> Number of ALI in study population

**Table 5: Odds ratios (OR) and 95% confidence interval (C.I.) of ALI for which were impacted by life style and socioeconomic status, adjusted for sex and age, NPHS, Canada, 1994-2006**

|                                         |                          | 1996        |           | 1998      |           | 2000      |           | 2002      |           | 2004      |           | ← 2006    |           |           |
|-----------------------------------------|--------------------------|-------------|-----------|-----------|-----------|-----------|-----------|-----------|-----------|-----------|-----------|-----------|-----------|-----------|
|                                         |                          | OR          | 95% C.I.  | OR        | 95% C.I.  | OR        | 95% C.I.  | OR        | 95% C.I.  | OR        | 95% C.I.  | OR        | 95% C.I.  |           |
| <b>Age groups</b>                       |                          |             |           |           |           |           |           |           |           |           |           |           |           |           |
|                                         | M/F                      | 1.4*        | 1.1 - 1.6 | 1.3*      | 1.1 - 1.6 | 0.9       | 0.8 - 1.1 | 1.3*      | 1.1 - 1.5 | 1.4*      | 1.2 - 1.6 | 1.3*      | 1.1 - 1.4 |           |
|                                         | 20-39                    | 2.1*        | 1.6 - 2.9 | 1.9*      | 1.5 - 2.4 | 1.8*      | 1.4 - 2.3 | 2.2*      | 1.8 - 2.7 | 1.8*      | 1.5 - 2.2 | 2.2*      | 1.8 - 2.6 |           |
|                                         | 40-59                    | 1.6*        | 1.1 - 2.1 | 1.4*      | 1.1 - 1.8 | 1.3       | 1.0 - 1.6 | 1.6*      | 1.3 - 2.0 | 1.3       | 1.0 - 1.5 | 1.5*      | 1.2 - 1.8 |           |
|                                         | 60+<br>(reference)       | 1.0         | ~         | 1.0       | ~         | 1.0       | ~         | 1.0       | ~         | 1.0       | ~         | 1.0       | ~         |           |
| <b>Background variables<sup>2</sup></b> |                          |             |           |           |           |           |           |           |           |           |           |           |           |           |
|                                         | Married/<br>Common-law   | yes/no      | 1.0       | 0.8 - 1.2 | 1.0       | 0.8 - 1.2 | 1.0       | 0.8 - 1.2 | 1.0       | 0.9 - 1.2 | 0.9       | 0.7 - 1.0 | 0.9       | 0.8 - 1.0 |
|                                         | Income                   | low/high    | 1.1       | 0.9 - 1.3 | 1.0       | 0.9 - 1.3 | 1.2       | 1.0 - 1.4 | 0.9       | 0.8 - 1.1 | 1.1       | 0.9 - 1.3 | 1.2       | 1.0 - 1.4 |
|                                         | Completed<br>High School | yes/no      | 1.2       | 1.0 - 1.5 | 1.1       | 0.9 - 1.3 | 1.0       | 0.8 - 1.2 | 0.9       | 0.8 - 1.1 | 0.9       | 0.7 - 1.0 | 1.1       | 0.9 - 1.3 |
|                                         | Rural                    | yes/no      | 1.1       | 0.9 - 1.4 | 1.1       | 0.9 - 1.3 | 0.9       | 0.7 - 1.1 | 1.1       | 0.9 - 1.3 | 0.8       | 0.7 - 1.0 | 1.0       | 0.8 - 1.1 |
|                                         | Non-English<br>Immigrant | yes/no      | 0.9       | 0.7 - 1.1 | 0.9       | 0.7 - 1.0 | 0.8       | 0.7 - 1.0 | 0.8       | 0.7 - 1.0 | 0.7       | 0.6 - 0.9 | 0.8       | 0.7 - 0.9 |
|                                         |                          | yes/no      | 0.6*      | 0.5 - 0.8 | 0.7*      | 0.6 - 0.9 | 0.8       | 0.6 - 1.0 | 0.8       | 0.6 - 1.0 | 0.7*      | 0.5 - 0.8 | 0.7*      | 0.6 - 0.9 |
| <b>Health related<sup>3</sup></b>       |                          |             |           |           |           |           |           |           |           |           |           |           |           |           |
|                                         | Current<br>Smoking       | yes/no      | 1.1       | 0.9 - 1.4 | 1.1       | 0.9 - 1.3 | 1.2       | 1.0 - 1.5 | 1.2       | 1.0 - 1.5 | 0.9       | 0.8 - 1.1 | 0.9       | 0.7 - 1.1 |
|                                         | Physical<br>Inactivity   | yes/no      | 0.8       | 0.7 - 0.9 | 0.8       | 0.7 - 0.9 | 0.8       | 0.6 - 0.9 | 0.9       | 0.8 - 1.1 | 0.8       | 0.7 - 0.9 | 0.8       | 0.7 - 0.9 |
|                                         | Obese                    | yes/no      | 1.2       | 1.0 - 1.5 | 1.2       | 1.0 - 1.5 | 1.1       | 0.9 - 1.3 | 1.0       | 0.9 - 1.2 | 1.1       | 0.9 - 1.3 | 1.0       | 0.8 - 1.1 |
|                                         | Alcohol<br>Drink /week   | 9+/less     | 1.2       | 0.9 - 1.5 | 1.2*      | 1.0 - 1.6 | 1.3*      | 1.0 - 1.7 | 1.4*      | 1.2 - 1.8 | 1.2       | 1.0 - 1.5 | 1.5*      | 1.3 - 1.8 |
|                                         | Alcohol 5+ at<br>time    | weekly/less | 1.3*      | 1.0 - 1.5 | 1.4*      | 1.2 - 1.7 | 1.4*      | 1.2 - 1.7 | 1.2*      | 1.0 - 1.5 | 1.3*      | 1.1 - 1.5 | 1.3*      | 1.1 - 1.5 |

Formatted Table

For sex group, females are the reference group  
 For background variables comparison groups, the second listed group for binary variables is the reference group  
 For health-related comparison groups, the second listed group for binary variables is the reference group  
 \* Means that there are statistically significant difference compared with control groups

Formatted: Line spacing: At least 12 pt

**Table 6: ~~Persons with ALI for which were impacted on~~ life style, socioeconomic status, and health care utilization of persons with an activity limiting injury before and after the injury, NPHS, Canada, 1994-2006**

|                                                        |               | Before  | During | After | Pp value* |        |        | N**    |       |
|--------------------------------------------------------|---------------|---------|--------|-------|-----------|--------|--------|--------|-------|
|                                                        |               | %       | %      | %     | A vs B    | B vs C | A vs C |        |       |
|                                                        |               | A       | B      | C     |           |        |        |        |       |
| <b>Risky behaviours and socioeconomic status</b>       |               |         |        |       |           |        |        |        |       |
| Income                                                 | low           | 36.3    | 32.1   | 28.5  | <0.001    | <0.001 | <0.001 | 2,892  |       |
| Obese                                                  | obese         | 17.8    | 19.7   | 22.4  | 0.005     | <0.001 | <0.001 | 1,780  |       |
| Physical activity                                      | inactive      | 50.4    | 47.1   | 48.1  | 0.001     | 0.197  | 0.343  | 3,044  |       |
| Smoking                                                | current       | 19.0    | 18.5   | 18.2  | 0.265     | 0.384  | 0.077  | 1,693  |       |
| Alcohol drinking                                       | 9+/wk         | 9.6     | 10.7   | 11.2  | 0.048     | 0.535  | 0.349  | 3,548  |       |
| <b>Health-related issues</b>                           |               |         |        |       |           |        |        |        |       |
| Limited activity                                       | yes           | 18.7    | 25.5   | 26.3  | <0.001    | 0.221  | <0.001 | 3,657  |       |
| Health status                                          | poor          | 33.1    | 36.3   | 39.6  | <0.001    | <0.001 | <0.001 | 3,653  |       |
| Medical Doctor                                         | visits        | 5+/year | 26.5   | 34.0  | 29.8      | <0.001 | <0.001 | <0.001 | 3,616 |
| Pain                                                   | yes           | 13.7    | 16.8   | 17.3  | <0.001    | 0.432  | <0.001 | 3,657  |       |
| Stress                                                 | yes           | 29.7    | 31.3   | 29.4  | 0.104     | 0.050  | 0.757  | 2,967  |       |
| <b>Medication use in past 30 days before interview</b> |               |         |        |       |           |        |        |        |       |
| Pain medication                                        | yes           | 61.9    | 70.2   | 70.8  | <0.001    | 0.489  | <0.001 | 3,640  |       |
| Sedatives                                              | /tranquiliser | yes     | 5.7    | 7.2   | 8.1       | 0.001  | 0.055  | <0.001 | 3,639 |
| Antidepressants                                        | yes           | 4.2     | 5.9    | 6.2   | <0.001    | 0.346  | 0.403  | 3,641  |       |

\*P value calculated by McNemar's test

\*\* N of persons making up the matched analysis for the before and after analysis

Formatted Table

Formatted: Line spacing: At least 12 pt

STROBE 2007 (v4) Statement—Checklist of items that should be included in reports of *cohort studies*

| Section/Topic                | Item # | Recommendation                                                                                                                                                                       | Reported on page # |
|------------------------------|--------|--------------------------------------------------------------------------------------------------------------------------------------------------------------------------------------|--------------------|
| Title and abstract           | 1      | (a) Indicate the study's design with a commonly used term in the title or the abstract                                                                                               | Page 1, 2          |
|                              |        | (b) Provide in the abstract an informative and balanced summary of what was done and what was found                                                                                  | Page 2, 3          |
| <b>Introduction</b>          |        |                                                                                                                                                                                      | <b>Page 4</b>      |
| Background/rationale         | 2      | Explain the scientific background and rationale for the investigation being reported                                                                                                 | Page 4             |
| Objectives                   | 3      | State specific objectives, including any prespecified hypotheses                                                                                                                     | Page 4             |
| <b>Methods</b>               |        |                                                                                                                                                                                      | <b>Page 5</b>      |
| Study design                 | 4      | Present key elements of study design early in the paper                                                                                                                              | Page 5             |
| Setting                      | 5      | Describe the setting, locations, and relevant dates, including periods of recruitment, exposure, follow-up, and data collection                                                      | Page 5, 6          |
| Participants                 | 6      | (a) Give the eligibility criteria, and the sources and methods of selection of participants. Describe methods of follow-up                                                           | Page 5, 6          |
|                              |        | (b) For matched studies, give matching criteria and number of exposed and unexposed                                                                                                  | Page 5, 6          |
| Variables                    | 7      | Clearly define all outcomes, exposures, predictors, potential confounders, and effect modifiers. Give diagnostic criteria, if applicable                                             | Page 7             |
| Data sources/<br>measurement | 8*     | For each variable of interest, give sources of data and details of methods of assessment (measurement). Describe comparability of assessment methods if there is more than one group | Page 7             |
| Bias                         | 9      | Describe any efforts to address potential sources of bias                                                                                                                            | Page 7             |
| Study size                   | 10     | Explain how the study size was arrived at                                                                                                                                            | Page 7             |
| Quantitative variables       | 11     | Explain how quantitative variables were handled in the analyses. If applicable, describe which groupings were chosen and why                                                         | Page 7, 8          |
| Statistical methods          | 12     | (a) Describe all statistical methods, including those used to control for confounding                                                                                                | Page 7, 8          |
|                              |        | (b) Describe any methods used to examine subgroups and interactions                                                                                                                  | Page 7, 8          |
|                              |        | (c) Explain how missing data were addressed                                                                                                                                          | Page 7, 8          |
|                              |        | (d) If applicable, explain how loss to follow-up was addressed                                                                                                                       | Page 7, 8          |
|                              |        | (e) Describe any sensitivity analyses                                                                                                                                                | Page 7, 8          |
| <b>Results</b>               |        |                                                                                                                                                                                      | <b>Page 8</b>      |

|                          |     |                                                                                                                                                                                                                                                                                                                                                                                                               |                                     |
|--------------------------|-----|---------------------------------------------------------------------------------------------------------------------------------------------------------------------------------------------------------------------------------------------------------------------------------------------------------------------------------------------------------------------------------------------------------------|-------------------------------------|
| Participants             | 13* | (a) Report numbers of individuals at each stage of study—eg numbers potentially eligible, examined for eligibility, confirmed eligible, included in the study, completing follow-up, and analysed<br>(b) Give reasons for non-participation at each stage<br>(c) Consider use of a flow diagram                                                                                                               |                                     |
| Descriptive data         | 14* | (a) Give characteristics of study participants (eg demographic, clinical, social) and information on exposures and potential confounders<br>(b) Indicate number of participants with missing data for each variable of interest<br>(c) Summarise follow-up time (eg, average and total amount)                                                                                                                | Page 5, 6<br>Page 5, 6<br>Page 5, 6 |
| Outcome data             | 15* | Report numbers of outcome events or summary measures over time                                                                                                                                                                                                                                                                                                                                                |                                     |
| Main results             | 16  | (a) Give unadjusted estimates and, if applicable, confounder-adjusted estimates and their precision (eg, 95% confidence interval). Make clear which confounders were adjusted for and why they were included<br>(b) Report category boundaries when continuous variables were categorized<br>(c) If relevant, consider translating estimates of relative risk into absolute risk for a meaningful time period | Page 8, 9                           |
| Other analyses           | 17  | Report other analyses done—eg analyses of subgroups and interactions, and sensitivity analyses                                                                                                                                                                                                                                                                                                                |                                     |
| <b>Discussion</b>        |     |                                                                                                                                                                                                                                                                                                                                                                                                               | Page 9-13                           |
| Key results              | 18  | Summarise key results with reference to study objectives                                                                                                                                                                                                                                                                                                                                                      | Page 9, 10, 11                      |
| <b>Limitations</b>       |     |                                                                                                                                                                                                                                                                                                                                                                                                               | Page 12                             |
| Interpretation           | 20  | Give a cautious overall interpretation of results considering objectives, limitations, multiplicity of analyses, results from similar studies, and other relevant evidence                                                                                                                                                                                                                                    | Page 9-13                           |
| Generalisability         | 21  | Discuss the generalisability (external validity) of the study results                                                                                                                                                                                                                                                                                                                                         |                                     |
| <b>Other information</b> |     |                                                                                                                                                                                                                                                                                                                                                                                                               |                                     |
| Funding                  | 22  | Give the source of funding and the role of the funders for the present study and, if applicable, for the original study on which the present article is based                                                                                                                                                                                                                                                 | Page 3                              |

\*Give information separately for cases and controls in case-control studies and, if applicable, for exposed and unexposed groups in cohort and cross-sectional studies.

**Note:** An Explanation and Elaboration article discusses each checklist item and gives methodological background and published examples of transparent reporting. The STROBE checklist is best used in conjunction with this article (freely available on the Web sites of PLoS Medicine at <http://www.plosmedicine.org/>, Annals of Internal Medicine at <http://www.annals.org/>, and Epidemiology at <http://www.epidem.com/>). Information on the STROBE Initiative is available at [www.strobe-statement.org](http://www.strobe-statement.org).



**Impact of Activity-Limiting Injuries based on the Canadian National Population Health Survey 1994-2006**

|                                 |                                                                                                                                                                                                                                                                                                                                                                                                                                                                                                                                                                                       |
|---------------------------------|---------------------------------------------------------------------------------------------------------------------------------------------------------------------------------------------------------------------------------------------------------------------------------------------------------------------------------------------------------------------------------------------------------------------------------------------------------------------------------------------------------------------------------------------------------------------------------------|
| Journal:                        | <i>BMJ Open</i>                                                                                                                                                                                                                                                                                                                                                                                                                                                                                                                                                                       |
| Manuscript ID:                  | bmjopen-2012-002052.R2                                                                                                                                                                                                                                                                                                                                                                                                                                                                                                                                                                |
| Article Type:                   | Research                                                                                                                                                                                                                                                                                                                                                                                                                                                                                                                                                                              |
| Date Submitted by the Author:   | 30-Jan-2013                                                                                                                                                                                                                                                                                                                                                                                                                                                                                                                                                                           |
| Complete List of Authors:       | Mo, Frank; Centre for Chronic Disease Prevention and Control, Public Health Agency of Canada<br>Neutel, Ineke; Department of Epidemiology, University of Ottawa<br>Morrison, Howard; Centre for Chronic Disease Prevention and Control, Public Health Agency of Canada<br>Hopkins, Doug; Centre for Chronic Disease Prevention and Control, Public Health Agency of Canada<br>Da Silva, Caroline; Centre for Chronic Disease Prevention and Control, Public Health Agency of Canada<br>Jiang, Ying; Centre for Chronic Disease Prevention and Control, Public Health Agency of Canada |
| <b>Primary Subject Heading</b>: | Public health                                                                                                                                                                                                                                                                                                                                                                                                                                                                                                                                                                         |
| Secondary Subject Heading:      | Epidemiology, Occupational and environmental medicine, Research methods                                                                                                                                                                                                                                                                                                                                                                                                                                                                                                               |
| Keywords:                       | EPIDEMIOLOGY, PUBLIC HEALTH, Health & safety < HEALTH SERVICES ADMINISTRATION & MANAGEMENT, Quality in health care < HEALTH SERVICES ADMINISTRATION & MANAGEMENT                                                                                                                                                                                                                                                                                                                                                                                                                      |
|                                 |                                                                                                                                                                                                                                                                                                                                                                                                                                                                                                                                                                                       |

SCHOLARONE™  
Manuscripts



1  
2  
3  
4 **Impact of Activity-Limiting Injuries based on the Canadian National Population Health Survey**  
5 **1994-2006**  
6  
7

8 Frank Mo<sup>1</sup>, PhD; Ineke Neutel<sup>2</sup>, PhD; Howard Morrison, PhD; Doug Hopkins, BA; Caroline Da Silva,  
9 BSc; Ying Jiang<sup>1</sup>, MSc  
10  
11

12 **Author references:**  
13

---

14  
15 <sup>1</sup>Consumer Product Safety and Injury Risk Assessment Program Working Group  
16 Science Integration Division  
17 Centre for Chronic Disease Prevention and Control  
18 Public Health Agency of Canada  
19  
20

21 <sup>2</sup>Department of Epidemiology and Community Medicine, Faculty of Medicine, University of Ottawa  
22  
23  
24  
25  
26  
27  
28  
29

30 **KEYWORDS** Activity limiting injury; impact factors, longitudinal health survey; epidemiology;  
31 injury prevention; Canada.  
32  
33  
34

35 **Correspondence to**  
36

37  
38 Dr. Frank Mo, Science Integration Division  
39 Centre for Chronic Disease Prevention and Control  
40 Public Health Agency of Canada  
41 Frank.Mo@phac-aspc.gc.ca.  
42  
43  
44

45 **Running title:** Impact of Activity-Limiting Injury trends  
46  
47

48 **Word count:**

49 Abstract: 300  
50 Manuscript: 3,496  
51  
52  
53  
54  
55  
56  
57  
58  
59  
60

## ABSTRACT

**Objective:** To examine the prevalence and factors affecting activity-limiting injuries (ALI) on individuals and on the Canadian population; to estimate the short and long term impact on health status and well-being due to ALI in Canada from 1994 to 2006 using the Canadian National Population Health Survey (NPHS).

**Design:** The NPHS is a randomised longitudinal cohort study with biennial interviews, with information on age, sex, education, marital status, income, residence, height and weight to self-perceived health status, health care utilization and medication use in addition to ALI.

**Setting:** The study population was a random sample of male and female participants 20 years and older from ten provinces and three territories in Canada.

**Primary and secondary outcome measures:** Logistic regression models were used to assess the potential impact of ALI on individuals and on the Canadian population. The interviews two years before and two years after the ALI were compared to examine long-term effects, and the McNemar test option in SAS was used for the matched analysis.

**Results:** The immediate impacts of ALI were pain, disability, and disruption of regular life. Long-term effects in patients were chronic pain and increased medical doctor visits. Population impact included a considerable increase in health care access and cost. The odds ratios (ORs) for the 20-39 age group compared to those 60+ was OR, 2.2; 95% CI, 1.8-2.7, while the OR associated with being male was 1.4; 95% CI, 1.1-1.6. Individuals consuming nine or more alcoholic drinks per week were also significantly more likely to report an ALI (OR, 1.5; 95% CI, 1.3-1.8).

**Conclusion:** The findings from this study illustrated the immediate and long term impact of individuals and population level injuries in Canada. Injury control policies should aim to prevent the both the number of injuries fatalities as well as the consequences among survivors.

### Summary Boxes:

What is already known on this subject?

1. Activity-limiting injuries (ALI) burden such as increased steadily prevalence, mortality and economic costs in Canada;
2. Showing increasing trends in obesity, limited activity, poor health status, medication use related to ALI;
3. Nature and types related to ALI;

What does this study add?

1. Potential associations between health care utilization and ALI before and after injury;
2. Hospital admission, Department emergency and medical doctors visits impacted on ALI;

3. The immediate individuals impact such as pain, disability, disruption of regular life. Long-term effects in patients were sequelae, chronic pain, and increased medical doctor visits after ALI. Population impact included loss of productivity and a considerable increase in health care access and cost.
4. policies should aim to prevent both the number of injuries fatalities as well as the consequences among survivors.

**Competing Interest:**

None to declare.

**Funding Statement:**

This research received no specific grant from any funding agency in the public, commercial or not-for-profit sectors.

**Contributorship Statement:**

Dr. Frank Mo, leader of the research project, and play the major role in research design, drafted the article and critical review, and advising for data analysis and results interpretation.

Dr. Ineke C. Neutel, contributed to data analysis, assisted in research design and data analysis, interpretation, and the report.

Dr. Howard Morrison, contributed to research consultation, provided critical review comments, and advising for data analysis and revised critically the article.

Mr. Doug Hopkins, assisted in research design, provided literature review and critical comments and signed final version of the manuscript.

Ms. Caroline Da Silva, participated in research design, provided critical review comments and signed final version of the manuscript.

Ms. Ying Jiang, contributed to research design, provided literature and critical review comments, and signed final version of the manuscript for submission.

## INTRODUCTION

Injuries are a serious public health issue with a major impact on the lives of Canadians. They are leading causes of death and hospitalization, as well as of disability, loss of productivity and potential years of life lost (PYLL) [1-4]. Sequelae from injuries include activity limitation, functional disability and pain which in turn influence a variety of social, psychological, labour force, and economic factors [5-8]. An analysis of emergency department (ED) visits and hospitalisation admissions for Ontario noted that one in four ED visits were injury-related, as were one in every 17 hospitalisations [9]. These data accentuated the importance of injuries to the health care system. Other studies have demonstrated the increasing medical doctor (MD) contacts, the use more medications for pain, more days in hospital, and more hours of home care services [9-11].

Several studies of traumatic disability have also focused on injuries resulting in hospitalization [12], types of injury [13-14], and serious head injuries [15]. One study reported that half of patients had some limitation in activity for two days or more due to injury, and patients treated in the clinic were somewhat more likely to have two or more days of limited activity than were patients treated in the ED [16].

Injuries are not only largely preventable, but the impact of injuries can usually be lessened. To develop effective policies leading to the prevention of injuries and to reduce the impact of injuries on society, information is needed about the influenced effects that individuals with injuries treated in the primary care setting and not requiring hospitalization frequently result in significant functional

1  
2  
3  
4 impairment and to identify those injuries which, by virtue of their contribution to disability, would be  
5  
6 targets for prevention programs.  
7  
8  
9

10  
11 The objectives of this study are to explore the immediate and longer term consequences of injury  
12 including physical, psychological, social and occupational functioning. This comprises a longitudinal  
13 population health study, which will measure the impact of injuries on individual's and population level  
14 health status and well-being due to activity-limiting injuries (ALI) in the NPHS from 1994 to 2006 in  
15  
16  
17  
18  
19  
20  
21 Canada.  
22  
23  
24

## 25 26 **METHODOLOGY**

### 27 28 **Study population**

29  
30 The source population for this study was the Canadian National Population Health Survey  
31 (NPHS), from 1994/1995 (cycle 1) to 2006/2007 (cycle 7). The study population was designed to be  
32 representative of the Canadian population with the exception of persons living on Indian reserves or on  
33 Canadian Forces bases [9, 11]. The sample design was a multiple cluster [17], ideal for controlling costs  
34 when personal interviews are needed, as was the case for cycle 1 of the NPHS. To cover as much as  
35 possible of the Canadian population, separate components of the survey were also carried out in the  
36 Territories and in health care institutions. In the Territories, a simpler stratified design was used. As  
37 well, anticipating the creation of Nunavut, separate strata were formed for each of the future territories,  
38 Nunavut and NWT [17]. The sampling frame for the first cycle (1994/5) originated with the Canadian  
39 Labour Force Survey (CLFS), a multi-stage, stratified sampling technique used for all provinces except  
40 Quebec for which a provincial sampling frame was used [17]. From the 2000 cycle onward, additional  
41  
42  
43  
44  
45  
46  
47  
48  
49  
50  
51  
52  
53  
54  
55  
56  
57  
58  
59  
60

1  
2  
3  
4 questions were added to the questionnaire, such as more detailed questions on health care use after the  
5  
6 ALI, with the result that some analyses are restricted to data from 2000 to 2006  
7  
8  
9

10  
11 Nearly all respondents were re-interviewed biennially by telephone except for individuals  
12  
13 without a telephone, for whom face to face interviews were used. Interviewers were instructed to follow  
14  
15 all reasonable strategies to trace people. Response rates were 83.6% for cycle one, 92.8% for cycle two,  
16  
17 88.3% for cycle three, 84.9% for cycle four, 80.8% for cycle five, 77.6% for cycle six and 77.0% for  
18  
19 cycle seven.  
20  
21  
22  
23  
24  
25

26 To look at ADIs resulting from new injuries, data for cycles from 1996 to 2006 were used; data  
27  
28 for 1994 was only used for the “before and after” analysis (Table 6). Data were used from respondents  
29  
30 who were willing to share their data for data analysis, who completed all interviews to date, and who  
31  
32 achieved the age of 20 before 2006. Since the source population, i.e. the total NPHS population,  
33  
34 covered more ages than the population analysed for this study, it was possible to add younger persons  
35  
36 from the source population to our study population after the cycle at which they reached age of 20 years  
37  
38 old. Consequently, the study population changed somewhat over the years of the study allowing  
39  
40 comparable cross-sectional analysis of populations with the same age range and age distribution.  
41  
42  
43  
44  
45  
46

## 47 Variables

48  
49 The interview ranged from background questions (age, sex, education, marital status, income,  
50  
51 residence, height and weight) to health-related questions (self-perceived health status, health care  
52  
53 utilization and medication use). Body mass index (BMI) was calculated as weight in kilograms divided  
54  
55  
56  
57  
58  
59  
60

1  
2  
3  
4 by height in meters squared [18]. A BMI of 30 or over was considered obese. Respondents were asked  
5  
6  
7 to rate their health as one of five categories: excellent, very good, good, fair or poor and for this study,  
8  
9 the lower two categories were combined as poorer health and the top three as good health. Depression  
10  
11 and stress were measured by the following questions: “have you had 2 weeks in a row during the past 12  
13  
14 months when you were sad, blue, or depressed?” and “During the past month, about how often did you  
15  
16 feel: ... so sad that nothing could cheer you up? ... nervous? ... restless or fidgety? ... hopeless?...  
17  
18 worthless?”. A question about number of visits to any type of physician or medical specialist in the past  
19  
20 year was dichotomized as: “five or more visits, versus fewer than five visits”. Alcohol consumption was  
21  
22 based on a series of question on the number of drinks consumed each day of the past seven days before  
23  
24 the interview. For this study, this was expressed as drinking nine or more drinks per week, versus  
25  
26 drinking eight or less. In this study, “alcohol used 5+ at a time” was defined as "How often in the past  
27  
28 week have you had 5 or more drinks on one occasion?". The variable “hospital treatment” was  
29  
30 described as "Did you receive any medical attention for this injury from a health professional within 48  
31  
32 hours?" For example, doctor, hospital emergency room. Quartiles of total household income were  
33  
34 calculated for the study population, with the lower two quartiles combined for the low income category  
35  
36 to be compared to the top two as the high income category. A Physical activity index was calculated  
37  
38 based on kilocalories per kilogram of body weight per day expended (KKD). Physically active was  
39  
40 defined as energy expenditure of at least 3 KKD; and physically inactive was defined as less than 1.5  
41  
42 KKD. Medication use was elicited by the question: “In the past 30 days, did you take . . . ?” This was  
43  
44 followed by a series of questions, such as “Did you take antidepressants and or anti-stressants?” “Did  
45  
46 you take anything for pain?” A 'no' answer to the question "Are you usually free of pain and  
47  
48 discomfort?" was taken as indication that the respondent often suffered pain.  
49  
50  
51  
52  
53  
54  
55  
56  
57  
58  
59  
60

1  
2  
3  
4 The definition of injury in the NPHS data was “In the past 12 months, did you have any injuries  
5 serious enough to limit your normal activities?” If more than one injury, the following questions were to  
6 refer to the most serious one. A separate question asked respondents a general question about  
7 limitations in activity, “Because of a long-term physical or mental condition or a health problem, have  
8 you limited in the kind or amount of activity you could do: at home? at school? at work? in other  
9 activities?”. Otherwise, they should be defined as non-activity limiting.  
10  
11  
12  
13  
14  
15  
16  
17  
18  
19  
20

## 21 Data Analysis

22  
23 For the statistical analysis, SAS version 9.2 (SAS Institute, Cary, NC, USA) was used. Logistic  
24 regression was used to calculate odds ratios (OR) with the presence/absence of ALI as the dependent  
25 variable, adjusted for age (in single years) and sex. Since the data were collected as a statistical sample  
26 of the Canadian population, the ‘weight’ option was used in all SAS statistical analyses to make the  
27 results representative of the Canadian population from 1994 to 2006 in seven cycles of cross-sectional  
28 studies. Weights were provided by Statistics Canada according to their sampling procedures. In order to  
29 produce a meaningful estimate of the variance for the weighted results, the weights were adjusted using  
30 the formula: [average weight = (sample weight/sum of the sample weights) \* sample size].  
31  
32  
33  
34  
35  
36  
37  
38  
39  
40  
41

42 In order to determine the characteristics, life style and health status, medical attention and health  
43 care utilization as well as activity limitation and disability, which were impacted by ALI, all new injury  
44 cases, i.e., those who had not reported an injury in the previous interview were identified. For each new  
45 case, data from three cycles were selected, 1) the cycle before reporting, 2) the cycle of reporting, 3) the  
46 cycle after reporting. Data for the 1994 cycle were used only in this ‘before and after’ analysis. Only  
47 the first recorded ALI report per person was included. The McNemar test option in SAS was used for  
48  
49  
50  
51  
52  
53  
54  
55  
56  
57  
58  
59  
60



1  
2  
3  
4 matched analysis. This study approved by the research ethics committee of Health Canada.  
5  
6  
7  
8

## 9 RESULTS

10  
11 The numbers of ALI in the study population increased from 755 cases in 1996 to 1,006 in 2006  
12  
13 .The weighted prevalence of all ALI increased steadily from 10.5% in 1996 to 12.8% in 2006. Those  
14  
15 reporting ALI showed increasing trends in obesity, limited activity, poor health status, people who live  
16  
17 in the rural areas and drank more than 9 drinks per week, medication use, and potential injury sequelae,  
18  
19 such as pain, stress but declining trends in lower income, current smoking, and immigrants (**Table 1**).  
20  
21 The proportion of injuries which resulted in activity limitations were higher for males, and increased  
22  
23 more over time than for females (**Table 2**). Furthermore, younger adults (20-49 yrs.) were more likely  
24  
25 to report activity limiting injuries (12.2% to 14.0%) compared to older (50+ yrs.) adults (8.6% to  
26  
27 9.8%).Among respondents who reported a ALI, the weighted percentages who reported five or more  
28  
29 visits to a medical doctor (MD) within the previous year decreased from 29.8% in 2000 to 25.3% in  
30  
31 2006, emergency department (ED) visits went from 34.0% to 28.8%, and hospital admission within 48  
32  
33 hours after the injury went from 6.5% to 4.9% (**Table 3**). The rate of hospital admissions within 48  
34  
35 hours for adults aged 50+ years was higher than that of young aged (20-49) group.  
36  
37  
38  
39  
40  
41  
42  
43  
44

45 The most frequently reported injuries resulting in activity limitation were sprains and strains  
46  
47 (42%), followed by fractures and dislocations (20%), and cuts, punctures and bites (10%) (**Table 4**).  
48  
49 Only 3.3 to 5.0% of ALIs were in the category of brain, internal and multiple injuries. Men tended to  
50  
51 have more cuts, punctures and bites while women had more scrapes, bruises and blisters. Younger ages  
52  
53 tended to have more sprains and strains and older ages more fractures and dislocations.  
54  
55  
56  
57  
58  
59  
60

1  
2  
3  
4  
5  
6  
7 Logistic regression analysis indicated that younger age groups and male participants were more  
8  
9 impacted by ALI. Only a few of the other variables showed associations with ALI - immigrants had  
10  
11 consistently lower rates of ALI, while people consumed nine or more alcoholic drinks per week had  
12  
13 significantly higher rates (**Table 5**).

14  
15  
16  
17  
18  
19 Attributes of persons with an ALI were compared in the cycles before and after their injury  
20  
21 (**Table 6**). Most behavioural risk factors examined showed a pattern of an increase from the two years  
22  
23 previous to the ALI to the time of the ALI to a further increase the two years after the ALI. A similar  
24  
25 pattern was observed for health status and interactions with the health care system. (**Table 6**).

## 30 **DISCUSSION**

31  
32  
33 Based on NPHS data, more than 10% of the adult Canadian population annually experience an  
34  
35 ALI, with the proportion increasing from 10.5% in 1996 to 12.8% in 2006. According to the definition  
36  
37 of ALI as activity-limiting injuries, all people with ALI experienced a certain amount of disruption of  
38  
39 their daily activities with the impact varying according to the type and severity of their injury and  
40  
41 depending on their customary type of activity [19-22]. About 20% of ALIs were fractures and  
42  
43 dislocations, many of whom necessitated a period of altered activity. Older people were more likely to  
44  
45 report fractures than the younger age groups. The most common injuries were sprains and strains, the  
46  
47 impact of which also varied a great deal depending on type and severity [23-24]. An important impact  
48  
49 of injuries is on the workplace through absenteeism and on the family through the disruption of  
50  
51 customary activities [25-26]. Besides the impact of injuries on every day activities, there was also the  
52  
53  
54  
55  
56  
57  
58  
59  
60

1  
2  
3  
4 impact on the health care system [27]. In our data, in 2000, about two thirds of people with ALI sought  
5 some kind of medical care. Evidence was presented showing that the impact of ALI might be even more  
6 far-reaching, as seen by the higher levels of medical care, and continued pain remaining two years after  
7 the ALI were reported.  
8  
9  
10  
11  
12

13  
14  
15  
16 Other research on injuries has used a variety of definition of injuries, based on different sources  
17 of information. Questions in the NPHS were able to put these other measures in perspective. For  
18 example, some studies used hospital-based data [28], but the present study showed that only about 5% of  
19 ALI were resulted in a hospital admission within the first 48 hours after the event. Assuming that all  
20 injuries that required hospitalization were within the activity-limiting rubric, it is clear that studies using  
21 only hospital data would include only a small portion of important injuries [29]. However, the  
22 hospitalized injuries will be the more severe injuries which are responsible for a disproportional share of  
23 the health care cost and disability [25]. Other studies have used ED visits as a unit of measurement [9].  
24 The present study showed less than one third of ALI went to an ED to obtain treatment. Again, the latter  
25 were the more severe injuries or those needing specialized treatment, e.g., casts on fractures, and thus  
26 had a greater impact on daily life and cost. Another source of data commonly used has been mortality  
27 data. Although deaths are definitely activity-limiting, obviously, none were included in this study. Fatal  
28 injuries reflect a different range of injuries than those for ALI. For example, in an US study, firearm-  
29 related injuries were 22% of all injury deaths, second only to traffic accident related injuries, but  
30 firearms amounted to less than 1% for non-fatal injuries [11]. Thus, different measuring units for  
31 measuring injury rates will target different slices of the spectrum of injuries and provide different results.  
32 ALI are of special public health importance, but are not sufficiently studied.  
33  
34  
35  
36  
37  
38  
39  
40  
41  
42  
43  
44  
45  
46  
47  
48  
49  
50  
51  
52  
53  
54  
55  
56  
57  
58  
59  
60

1  
2  
3  
4  
5  
6  
7 Another level of impact resulting from ALI would consist of impact on the health care system.  
8  
9 Approximately 60% of people with ALI obtained medical care of some type. Of these, approximately  
10  
11 one third of persons with ALI went to ED to experience the often long wait before receiving treatment.  
12  
13 Back at home the patient would not only experience the pain and disability of the ALI, but also the need  
14  
15 to negotiate the health care system, such as making appointments with physicians, specialists,  
16  
17 physiotherapists, etc., finding transportation, often needing someone to accompany them [30-33]. Even  
18  
19 though the proportion of the population with ALI increased over the years 2000-2006, decreases were  
20  
21 seen in use of primary care and the hospital ED visits as well as hospitalisation. This decrease in health  
22  
23 care use could be an indication either of greater difficulty in accessing health care, or that the nature of  
24  
25 ALIs has moderated over the years. Berdahl found variation by ethnic group and sex, both in the  
26  
27 reporting of work-related injuries and in the seeking of medical care and the change in ethnic  
28  
29 composition over the years could also be a factor in the NPHS data [34-36]. In any case, ALI are  
30  
31 suffered by a large proportion of the population annually, and a majority of these seek medical treatment  
32  
33 whether primary care, ED or hospital care. Clearly, this entails a large cost to the health care system and  
34  
35 any prevention would not only improve quality of life of the putative victims but also would result in  
36  
37 significantly lower health care costs.  
38  
39  
40  
41  
42  
43  
44  
45  
46

47 Another type of impact would be long-term changes after the injury. The 'before and after' data  
48  
49 available in the NPHS consisted of comparing the cross-sectional data from the interview cycle before  
50  
51 the ALI with the data of the cycle reporting the ALI and with the next cycle after the ALI. While the  
52  
53 interviews for each respondent could be linked for the 'before and after' cycles it was more difficult to  
54  
55  
56  
57  
58  
59  
60

1  
2  
3  
4 determine which changes in attributes in the year of the ALI or subsequent years were sequelae of the  
5  
6 ALI. For example, it might make sense that the increasing obesity for people with ALI be linked to  
7  
8 after-effects, e.g. [37], due to inactivity resulting from the ALI but, in fact, similar changes were  
9  
10 happening in the overall population. Given these caveats, we can note that no changes were found for  
11  
12 smoking and little change in excessive alcohol use. Most likely to show long-term effects due to ALI  
13  
14 were visits to medical doctors and ongoing pain. People with ALI showed increasing likelihood of  
15  
16 visiting a MD at least five times during the year which continued for the subsequent cycle. Similarly  
17  
18 pain increased in the cycle with the ALI and remained high over the years. Although this is weak  
19  
20 evidence, it confirms work on long-term effects of other researchers [38-39] and again emphasizes the  
21  
22 impact of ALI in the population.  
23  
24  
25  
26  
27  
28  
29

30 Injuries have been found to lead to lost productivity, medical costs, compensation costs and  
31  
32 long-term health problems and disability [40-42], which was confirmed by the present results for the  
33  
34 Canadian population. Many injuries can be prevented and a better understanding of all aspects of  
35  
36 injuries will lead to better ways of prevention or the minimizing of their effects. However, collaboration  
37  
38 and cooperation is needed [43]. The European Union has committed itself to reducing number of traffic  
39  
40 fatalities from 45,000 to 25,000 by 2010, which as several reports point out, will require strong measures  
41  
42 against use of alcohol [44-47] and illicit and medicinal drugs before driving [48]. A difficulty in injury  
43  
44 prevention is the multi-faceted aspect of injuries. For example, a fall may have many causes, such as  
45  
46 unsafe working conditions or slippery stairs at home. Each of these issues would require different  
47  
48 approaches to prevention. Similar diversities are found for most other types of injuries. With all  
49  
50 difficulties inherent in devising effective interventions, prevention is still the best approach to lower the  
51  
52  
53  
54  
55  
56  
57  
58  
59  
60

1  
2  
3  
4 tremendous impact of ALI on the Canadian population.  
5  
6  
7  
8

9 The NPHS data have important strengths, such as its representativeness of the Canadian  
10 population and its longitudinal nature. Because of the longitudinal design, it was possible to identify  
11 new ALI, meaning no ALI in the previous interview, and compare risk factors before and after the event,  
12 as well as its consequences. The 'before and after' comparisons of the same person allowed for matched  
13 analysis at different times. Important also is the extensive and consistent information available on each  
14 respondent over the multiple cycles of the survey, such as type of ALI, and the medical care needed.  
15  
16 Besides strengths, the NPHS also has limitations. One issue is the lack of distinction between intentional  
17 and unintentional injuries. Another issue is that of self-reported data. Part of self-reporting is recall of  
18 events. Recall of having had an ALI has been shown elsewhere to be less accurate with increasing time  
19 and is also likely to vary with the severity of the injury [49-50]. Both of these would likely lead to an  
20 under-reporting of ALI. In spite of its limitations the NPHS gives an invaluable view of the level of  
21 serious injury in the Canadian adult population over a 12 year time period.  
22  
23  
24  
25  
26  
27  
28  
29  
30  
31  
32  
33  
34  
35  
36  
37  
38  
39

40 Another strength of these data is the use of ALI as a measurement of injury. There are various  
41 units of measurement in measuring rates of injury in a population. The unit of measurement used in the  
42 present study consists of the most serious ALI over the previous 12 months, excluding repetitive strains  
43 injuries. The use of ALI means the delimitation of a particular kind of injury in the spectrum of injuries  
44 as a concept meaningful to both respondent and researchers. In addition, it identifies a type of injury  
45 sufficiently severe to impact a person's regular routine.  
46  
47  
48  
49  
50  
51  
52  
53  
54  
55  
56  
57  
58  
59  
60

## CONCLUSION

The findings from this study quantified the immediate and long term impact of individuals and population level injuries in Canada. The immediate impact was pain, disability, and disruption of regular life. Long-term effects in patients were chronic pain and increased medical doctor's visits remaining two years after the ALI. Population impact included loss of productivity and a considerable increase in health care access and cost. This study also particularly contributes to injury prevention in social and psychological health services to help injured people make a better recovery and maintain the quality of life after injuries.

1  
2  
3  
4  
5  
6  
7  
8  
9  
10  
11  
12  
13  
14  
15  
16  
17  
18  
19  
20  
21  
22  
23  
24  
25  
26  
27  
28  
29  
30  
31  
32  
33  
34  
35  
36  
37  
38  
39  
40  
41  
42  
43  
44  
45  
46  
47  
48  
49  
50  
51  
52  
53  
54  
55  
56  
57  
58  
59  
60  
**REFERENCES**

1. Centre for Surveillance Coordination HC. Injury Surveillance in Canada: Current realities and Challenges. Ottawa: 2003; Health Canada.
2. Holtslag HR, Beeck EF van, Lichtveld RA, et al. Individual and population burdens of major trauma in the Netherlands. *Bull World Health Organ* 2008; 86:111–117.
3. Lyons RA, Kendrick D, Towner EM, et al. Measuring the Population Burden of Injuries—Implications for Global and National Estimates: A Multi-centre Prospective UK Longitudinal Study. *PLoS Med* 2011; 8(12): e1001140. doi:10.1371/journal.pmed.1001140.
4. Rivara FP, Thompson RS, Thompson, DC Calonge N. Injuries to Children and Adolescents: Impact on Physical Health. *Pediatrics* 1991;88:783-788.
5. Frank JW, Brooker AS, DeMaio S et al. Disability resulting from occupational low back pain part II: What do we know about secondary prevention? A review of the scientific evidence on prevention after disability begins. *Spine* 1996; 21(24):2918–2929.
6. Krause N, Frank JW, Dasinger LK et al. Determinants of duration of disability and return to work after work-related injury and illness: Challenges for future research. *Am J Ind Med* 2001;40:464–484.
7. Krause N, Ragland DR. Occupational disability due to low back pain: A new interdisciplinary classification based on a phase model of disability. *Spine* 1994;19(9):1011–1020.
8. Verbrugge LM, Jette AM. The disablement process. *Soc Sci Med* 1994;38(1):1–14.
9. MacPherson AK, Schull M, Manuel D et al. Injuries in Ontario: ICES Atlas. Toronto: Institute for Clinical Evaluative Sciences 2005;
10. MacKenzie EJ. Epidemiology of injuries: current trends and future challenges. *Epidemiol Rev* 2000; 22:112-9.
11. Schneier AJ, Shields BJ, Hostetler SG et al. Incidence of Pediatric Traumatic Brain Injury and Associated Hospital Resource Utilization in the United States. *Pediatrics*. 2006;118 (2):483-492.
12. Mayer T, Walker ML, Clark P. Further experience with a modified Abbreviated Injury Severity Scale. *J Trauma*. 1984;24:31-34.
13. Kraus JF, Fife D, Conroy C. Pediatric brain injuries: the nature, clinical course, and early outcomes in a defined United States' population. *Pediatrics*. 1987;79:501-507.
14. Casey R, Ludwig 5, McCormick MC. Morbidity following minor head trauma in children. *Pediatrics*. 1986;78:497-502.



15. Kraus JP, Fife D, Cox P et al. Incidence, severity and external causes of pediatric brain injury. *AJDC*. 1986;140:687-693.
16. Rivara FP, Calonge N, and Thompson R. Population-Based Study of Unintentional Injury Incidence and Impact during Childhood. *Am J Public Health* 1989;79:990-994.
17. Tambay J-L, Catlin G. Sample design of the National Population Health Survey. *Health Reports* 2006;7(1):29-38.
18. World Health Organization. What are overweight and obesity? Factsheet 2006; N°.311.
19. Majori S, Ricci G, Capretta F et al. Epidemiology of domestic injuries. A survey in an emergency department in North-East Italy. *J Prev Med Hyg*. 2009;50:164-9.
20. Scheiman S, Moghaddas HS, Bjornstig U et al. Bicycle injury events among older adults in Northern Sweden: a 10-year population based study. *Accid Anal Prev* 2010;42:758-63.
21. Ahmed LA, Schirmer H, Bjornerem A et al. The gender- and age-specific 10-year and lifetime absolute fracture risk in Tromso, Norway. *Eur J Epidemiol* 2009;24:441-8.
22. Ahmed LA, Emaus N, Berntsen GK, et al. Bone loss and the risk of non-vertebral fractures in women and men: the Tromso study. *Osteoporos Int*. 2010;21: 1503-11.
23. Aschkenasy MT, Rothenhaus TC. Trauma and falls in the elderly. *Emerg Med Clin North Am* 2006; 24:413-32.
24. Wilkins K. Medications and fall-related fractures in the elderly. *Health Rep* 1999;11:45-53.
25. Kendrick D, Vinogradova Y, Coupland C, et al. Getting back to work after injury: the UK Burden of Injury multicentre longitudinal study. *BMC Public Health* 2012;1 (12):584.
26. Kendrick D, Vinogradova Y, Coupland C, et al. Making a successful return to work: the UK burden of injury multicentre longitudinal study. *Br J Gen Pract* 2012 Feb; 62(595):e82-90.10.3399/bjgp12X625139.
27. Franche RL, Krause N. Readiness for Return to Work Following Injury or Illness: Conceptualizing the Interpersonal Impact of Health Care, Workplace, and Insurance Factors. *JOccup Rehabil* 2002; December 12 (4):233-256.
28. Frisina PG, Guellnitz R, Alverzo J. A time series analysis of falls and injury in the inpatient rehabilitation setting. *Rehabil Nurs* 2010;35:141-6.

- 1  
2  
3  
4  
5  
6  
7  
8  
9  
10  
11  
12  
13  
14  
15  
16  
17  
18  
19  
20  
21  
22  
23  
24  
25  
26  
27  
28  
29  
30  
31  
32  
33  
34  
35  
36  
37  
38  
39  
40  
41  
42  
43  
44  
45  
46  
47  
48  
49  
50  
51  
52  
53  
54  
55  
56  
57  
58  
59  
60
29. Pickett W, Hartling L, Brison RJ. A population-based study of hospitalized injuries in Kingston, Ontario, identified via the Canadian Hospitals Injury Reporting and Prevention Program. *Chronic Dis Can* 1997;18:61-9.
  30. Dryden DM, Saunders LD, Rowe BH et al. Utilization of health services following spinal cord injury: a 6-year follow-up study. *Spinal Cord* 2004; 42:513-525.
  31. Brown JA, Shannon HS, McDonough P et al. Healthcare Use of Families of Injured Workers Before and After a Workplace Injury in British Columbia, Canada. *Healthcare Policy* 2007; 2(3):1-124.
  32. Berthelot J-M and the Project Team. Injury hospitalizations and socio-economic status. Ottawa, Ontario: 2010; CIHI.
  33. Compston J. Osteoporosis: social and economic impact. *Radiol Clin North Am* 2010;48:477-82.
  34. Berdahl TA, Zodet M. Medical care utilization for work-related injuries in the United States 2002-2006. *Med Care* 2010;48:645-51.
  35. de Castro AB, Fujishiro K, Rue T et al. Associations between work schedule characteristics and occupational injury and illness. *Int Nurs Rev* 2010;57:188-94.
  36. Lombardi DA, Folkard S, Willetts JL et al. Daily sleep, weekly working hours, and risk of work-related injury: US National Health Interview Survey (2004-2008). *Chronobiol Int* 2010;27(5):1013-30.
  37. Bergkvist D, Hekmat K, Svensson T, et al. Obesity in orthopedic patients. *Surg Obes Relat Dis* 2009; 5:670-2.
  38. Cameron CM, Kliwer EV, Purdie DM et al. Long term health outcomes after injury in working age adults: a systematic review. *J Epidemiol Community Health* 2006;60:341-4.
  39. Toft AM, Moller H, Laursen B. The years after an injury: long-term consequences of injury on self-rated health. *J Trauma* 2010;69:26-30.
  40. Borgstrom F, Zethraeus N, Johnell O, et al. Costs and quality of life associated with osteoporosis-related fractures in Sweden. *Osteoporos Int* 2006;17:637-50.
  41. Brinsky A, Glick H, Lydick E, et al. The economic cost of hip fractures in community-dwelling older adults: a prospective study. *J Am Geriatr Soc* 1997;45:281-7.
  42. Hendrie D, Hall SE, Arena G et al. Health system costs of falls of older adults in Western Australia. *Aust Health Rev* 2004; 28:363-73.
  43. Sleet DA, Moffett DB. Framing the problem: injuries and public health. *Fam Community Health* 2009;32:88-97.

- 1  
2  
3  
4  
5 44. Desapriya E, Pike I, Raina P. Severity of alcohol-related motor vehicle crashes in British Columbia:  
6 case - control study. *Int J Contr Saf Promot* 2006;13:89-94.  
7  
8 45. Kool B, Ameratunga S, Robinson E et al. The contribution of alcohol to falls at home among  
9 working-aged adults. *Alcohol* 2008;42:383-8.  
10  
11 46. Kool B, Ameratunga S, Jackson R. The role of alcohol in unintentional falls among young and  
12 middle-aged adults: a systematic review of epidemiological studies. *Inj Prev* 2009; 15:341-7.  
13  
14 47. Ahlm K, Bjornstig U, Ostrom M. Alcohol and drugs in fatally and non-fatally injured motor vehicle  
15 drivers in northern Sweden. *Accid Anal Prev* 2009; 41:129-36.  
16  
17 48. Gouille JP, Verstraete A, Boulu R, et al. Illicit drugs, medications and traffic accidents. *Ann Pharm*  
18 *Fr* 2008;66:196-205.  
19  
20  
21 49. Wilkins K, Mackenzie SG. Work injuries. *Health Rep* 2007;18:25-42.  
22  
23  
24 50. Warner M, Schenker N, Heinen MA et al. The effects of recall on reporting injury and poisoning  
25 episodes in the National Health Interview Survey. *Inj Prev* 2005;11:282-7.  
26  
27  
28  
29  
30  
31  
32  
33  
34  
35  
36  
37  
38  
39  
40  
41  
42  
43  
44  
45  
46  
47  
48  
49  
50  
51  
52  
53  
54  
55  
56  
57  
58  
59  
60

**Table 1: The percent and univariate analyses of the characteristics related to adult Canadians reporting an activity limiting injury in the NPHS data, 1996-2006\***

| Year                                  | 1996  | 1998  | 2000 | 2002  | 2004  | 2006  | 2006/<br>1996 | P-<br>value |
|---------------------------------------|-------|-------|------|-------|-------|-------|---------------|-------------|
| All                                   | 10.5  | 10.9  | 11.4 | 12.6  | 12.6  | 12.8  | 1.22          | 0.048       |
| <b>Background variables</b>           |       |       |      |       |       |       |               |             |
| Married/common law                    | 71.0  | 69.3  | 68.2 | 66.2  | 65.7  | 64.7  | 0.91          | 0.063       |
| Low income                            | 40.0  | 34.2  | 27.9 | 26.0  | 23.5  | 19.8  | 0.50          | 0.039       |
| Completed High School                 | 89.6  | 89.9  | 89.3 | 84.7  | 84.5  | 84.5  | 0.94          | 0.068       |
| Rural                                 | 17.9  | 20.5  | 21.0 | 20.6  | 19.9  | 22.0  | 1.23          | 0.041       |
| Immigrant                             | 17.5  | 17.3  | 16.8 | 16.2  | 16.1  | 15.7  | 0.90          | 0.081       |
| <b>Health related variables</b>       |       |       |      |       |       |       |               |             |
| Current smoking                       | 22.7  | 21.3  | 20.4 | 17.1  | 17.1  | 16.0  | 0.70          | 0.153       |
| Inactive                              | 58.3  | 52.9  | 56.1 | 48.3  | 51.0  | 45.9  | 0.79          | 0.098       |
| Obese                                 | 18.4  | 21.2  | 23.0 | 24.3  | 25.0  | 26.4  | 1.43          | 0.001       |
| 9+ alcohol drinks/ week               | 11.0  | 11.6  | 11.9 | 11.8  | 11.6  | 14.8  | 1.35          | 0.001       |
| <b>Region of residence</b>            |       |       |      |       |       |       |               |             |
| Atlantic                              | 8.8   | 8.7   | 8.9  | 8.8   | 8.7   | 8.7   | 0.99          | 0.086       |
| Quebec                                | 25.5  | 25.6  | 25.9 | 26.0  | 26.1  | 25.9  | 1.01          | 0.078       |
| Ontario                               | 36.3  | 36.0  | 36.0 | 35.8  | 36.1  | 36.2  | 1.00          | 0.101       |
| Prairies                              | 17.0  | 17.3  | 17.1 | 17.4  | 17.3  | 17.4  | 1.02          | 0.098       |
| BC                                    | 12.5  | 12.4  | 12.1 | 12.0  | 11.8  | 11.9  | 0.95          | 0.156       |
| <b>Outcome-related</b>                |       |       |      |       |       |       |               |             |
| Limited activity                      | 17.3  | 17.8  | 18.0 | 22.9  | 24.5  | 26.6  | 1.54          | 0.001       |
| Poor health status                    | 33.6  | 33.2  | 38.0 | 41.2  | 42.3  | 43.5  | 1.29          | 0.035       |
| 5+ Medical Doctor visits /year        | 24.2  | 26.3  | 26.6 | 27.6  | 28.3  | 26.8  | 1.11          | 0.056       |
| Pain                                  | 12.3  | 13.7  | 13.3 | 15.1  | 16.4  | 15.8  | 1.28          | 0.039       |
| Stress                                | 26.3  | 29.2  | 25.1 | 27.3  | 28.3  | 27.4  | 1.04          | 0.083       |
| Depression                            | 6.1   | 5.8   | 6.4  | 6.9   | 7.1   | 6.0   | 0.98          | 0.158       |
| <b>Medication use in last 30 days</b> |       |       |      |       |       |       |               |             |
| Pain medication                       | 65.6  | 67.5  | 70.1 | 70.2  | 70.4  | 70.6  | 1.08          | 0.096       |
| Tranquilizer/ sedative                | 5.1   | 5.3   | 6.8  | 8.1   | 8.2   | 10.0  | 1.96          | 0.001       |
| Antidepressants                       | 3.6   | 4.4   | 5.4  | 5.9   | 6.9   | 7.0   | 1.94          | 0.001       |
| Total Number <sup>1</sup>             | 7,313 | 7,529 |      | 7,717 | 7,875 | 8,085 | 8,324         |             |

\*Univariate analysis was used to compare the trend of ALI between 1996 and 2006 in the different characteristics; P value <0.05 means a significant difference between study and control groups.

<sup>1</sup> total number of survey respondents used to calculate weighted percentages representative of the Canadian population

**Table 2: Percentages for ALI for which were impacted by activity limitation per year, NPHS, Canada, 2000-2006**

| Years             |                         | 2000 | 2002 | 2004 | 2006 |
|-------------------|-------------------------|------|------|------|------|
|                   | <b>Injury status</b>    |      |      |      |      |
| <b>All</b>        | None                    | 85.5 | 84.0 | 84.0 | 82.2 |
|                   | Activity limiting (yes) | 10.8 | 12.1 | 11.6 | 12.0 |
|                   | Activity limiting (no)  | 3.1  | 3.0  | 3.5  | 5.1  |
|                   | Both                    | 0.6  | 0.4  | 1.0  | 0.8  |
| <b>Males</b>      | None                    | 84.9 | 82.0 | 82.2 | 80.1 |
|                   | Activity limiting (yes) | 10.5 | 13.5 | 13.2 | 13.2 |
|                   | Activity limiting(no)   | 3.9  | 3.9  | 3.4  | 5.6  |
|                   | Both                    | 0.7  | 0.7  | 1.3  | 1.1  |
| <b>Females</b>    | None                    | 86.0 | 85.8 | 85.7 | 84.1 |
|                   | Activity limiting (yes) | 11.1 | 10.8 | 10.1 | 10.9 |
|                   | Activity limiting(no)   | 2.4  | 3.0  | 3.6  | 4.6  |
|                   | Both                    | 0.5  | 0.4  | 0.7  | 0.5  |
| <b>Ages 20-49</b> | None                    | 83.5 | 81.7 | 81.2 | 79.3 |
|                   | Activity limiting (yes) | 12.2 | 13.9 | 13.3 | 14.0 |
|                   | Activity limiting(no)   | 3.5  | 3.7  | 4.3  | 5.8  |
|                   | Both                    | 0.8  | 0.7  | 1.3  | 0.9  |
| <b>Ages 50+</b>   | None                    | 88.5 | 87.2 | 87.4 | 85.3 |
|                   | Activity limiting (yes) | 8.6  | 9.5  | 9.5  | 9.8  |
|                   | Activity limiting (no)  | 2.6  | 3.1  | 2.5  | 4.2  |
|                   | Both                    | 0.3  | 0.3  | 0.6  | 0.6  |

**Table 3: The percent of persons reporting specific health care use among those reporting an ALI by age group and sex, NPHS, Canada, 2000-2006\***

| Year      |                                      | 2000 | 2002 | 2004 | 2006  |
|-----------|--------------------------------------|------|------|------|-------|
| All       | Number of ALI                        | 865  | 932  | 913  | 1,005 |
|           | Medical Doctor (MD) visits (5+/year) | 29.8 | 27.1 | 27.3 | 25.3  |
|           | Emergency Department (ED) visits     | 34.0 | 28.5 | 31.0 | 28.8  |
|           | Hospital admission in 48 hours       | 6.5  | 5.4  | 5.5  | 4.9   |
|           | Other                                | 2.7  | 4.3  | 3.1  | 5.2   |
|           | Any                                  | 66.6 | 60.0 | 61.5 | 59.3  |
|           | None                                 | 33.5 | 40.1 | 38.5 | 40.7  |
| Males     | Number of ALI                        | 394  | 460  | 463  | 482   |
|           | MD visits (5+/year)                  | 26.6 | 26.5 | 24.7 | 23.6  |
|           | ED visits                            | 34.5 | 27.4 | 30.8 | 29.7  |
|           | Hospital admission in 48 hours       | 9.5  | 4.5  | 4.6  | 4.1   |
|           | Other                                | 4.1  | 4.0  | 2.9  | 5.3   |
|           | Any                                  | 65.2 | 57.8 | 58.4 | 58.5  |
|           | None                                 | 34.8 | 42.2 | 41.6 | 41.5  |
| Females   | Number of ALI                        | 471  | 472  | 450  | 523   |
|           | MD visits (5+/year)                  | 32.6 | 27.7 | 30.5 | 27.3  |
|           | ED visits                            | 33.6 | 29.9 | 31.3 | 27.8  |
|           | Hospital admission in 48 hours       | 4.0  | 6.4  | 6.6  | 5.7   |
|           | Other                                | 1.5  | 4.7  | 3.4  | 5.1   |
|           | Any                                  | 67.7 | 62.4 | 65.2 | 60.2  |
|           | None                                 | 32.3 | 37.6 | 34.8 | 39.7  |
| Age 20-49 | Number of ALI                        | 588  | 601  | 564  | 590   |
|           | MD visits (5+/year)                  | 29.1 | 27.7 | 28.5 | 24.3  |
|           | ED visits                            | 34.3 | 27.6 | 28.7 | 27.3  |
|           | Hospital admission in 48 hours       | 6.2  | 4.1  | 2.9  | 3.6   |
|           | Other                                | 2.5  | 4.1  | 3.1  | 7.3   |
|           | Any                                  | 65.8 | 59.3 | 3.2  | 58.9  |
|           | None                                 | 34.2 | 40.7 | 39.7 | 41.1  |
| Age 50+   | Number of ALI                        | 277  | 331  | 349  | 415   |
|           | MD visits (5+/year)                  | 31.5 | 25.8 | 25.3 | 26.9  |
|           | ED visits                            | 33.6 | 30.6 | 34.9 | 31.1  |
|           | Hospital admission in 48 hours       | 7.3  | 8.1  | 9.9  | 6.9   |
|           | Other                                | 3.2  | 4.9  | 3.2  | 1.9   |
|           | Any                                  | 61.4 | 59.3 | 63.5 | 59.9  |
|           | None                                 | 31.8 | 38.6 | 36.6 | 40.1  |

**Table 4: The type of activity-limiting injury as a proportion of all activity-limiting injuries ALI NPHS, Canada, 1996-2006**

|                | Interview cycles           | 1996             | 1998             | 2000             | 2002             | 2004             | 2006             |
|----------------|----------------------------|------------------|------------------|------------------|------------------|------------------|------------------|
| N <sup>2</sup> | Number of ALI              | 755              | 786              | 865              | 931              | 911              | 1,006            |
|                |                            | <sup>1</sup> wt% |
| ALL            | Brain, internal, multiple  | 4.9              | 3.3              | 5.8              | 3.2              | 3.9              | 4.3              |
|                | Fractures/dislocation      | 20.6             | 21.2             | 19.9             | 20.3             | 22.2             | 24.9             |
|                | Burns                      | 5.3              | 3.3              | 4.3              | 2.8              | 4.3              | 3.7              |
|                | Sprains, strains           | 42.0             | 42.3             | 42.4             | 47.3             | 42.8             | 42.2             |
|                | Cuts, punctures, bites     | 10.2             | 15.5             | 11.8             | 11.6             | 11.1             | 9.7              |
|                | Scrapes, bruises, blisters | 7.7              | 6.9              | 7.8              | 4.8              | 7.1              | 6.3              |
|                | Other                      | 9.3              | 7.5              | 8.0              | 10.0             | 8.6              | 8.9              |
|                | Total                      | 100.0            | 100.0            | 100.0            | 100.0            | 100.0            | 100.0            |
| Males          | Brain, internal, multiple  | 5.4              | 2.8              | 5.0              | 2.4              | 4.1              | 4.5              |
|                | Fractures/dislocation      | 21.3             | 21.5             | 21.5             | 20.3             | 21.0             | 26.1             |
|                | Burns                      | 5.8              | 2.4              | 3.9              | 3.5              | 4.6              | 2.7              |
|                | Sprains, strains           | 39.6             | 42.6             | 40.5             | 47.2             | 41.7             | 39.8             |
|                | Cuts, punctures, bites     | 12.2             | 17.4             | 16.7             | 13.9             | 13.6             | 13.1             |
|                | Scrapes, bruises, blisters | 6.2              | 5.2              | 5.7              | 4.4              | 6.2              | 5.8              |
|                | Other                      | 9.5              | 8.1              | 6.7              | 8.3              | 8.8              | 8.0              |
| Females        | Brain, internal, multiple  | 4.3              | 3.9              | 6.4              | 3.8              | 3.6              | 4.2              |
|                | Fractures/dislocation      | 19.8             | 21.0             | 18.5             | 21.6             | 23.6             | 23.3             |
|                | Burns                      | 4.5              | 4.1              | 4.7              | 3.6              | 4.0              | 4.8              |
|                | Sprains, strains           | 45.0             | 41.9             | 44.1             | 46.0             | 44.3             | 44.9             |
|                | Cuts, punctures, bites     | 7.8              | 13.3             | 7.7              | 9.1              | 7.9              | 6.0              |
|                | Scrapes, bruises, blisters | 9.5              | 8.9              | 9.5              | 6.4              | 8.2              | 7.0              |
|                | Other                      | 9.1              | 6.9              | 9.1              | 9.5              | 8.4              | 9.8              |
| Age 20-49      | Brain, internal, multiple  | 4.8              | 3.3              | 4.9              | 3.1              | 3.7              | 3.0              |
|                | Fractures/dislocation      | 17.4             | 19.8             | 22.5             | 17.4             | 18.2             | 22.9             |
|                | Burns                      | 5.5              | 3.3              | 4.1              | 3.5              | 5.0              | 4.8              |
|                | Sprains, strains           | 43.8             | 47.2             | 42.8             | 51.3             | 50.9             | 46.3             |
|                | Cuts, punctures, bites     | 10.9             | 15.5             | 11.5             | 10.7             | 9.4              | 9.4              |
|                | Scrapes, bruises, blisters | 8.5              | 5.0              | 7.5              | 4.5              | 4.4              | 4.6              |
|                | Other                      | 9.1              | 5.9              | 6.7              | 9.5              | 8.4              | 9.0              |
| Age 50+        | Brain, internal, multiple  | 5.4              | 3.4              | 7.6              | 3.4              | 4.2              | 6.3              |
|                | Fractures/dislocation      | 30.8             | 24.9             | 13.8             | 26.4             | 29.0             | 27.9             |
|                | Burns                      | 4.3              | 3.0              | 4.9              | 1.4              | 3.3              | 1.9              |
|                | Sprains, strains           | 36.2             | 30.2             | 41.7             | 39.0             | 29.1             | 35.8             |

|   |                            |      |      |      |      |      |      |
|---|----------------------------|------|------|------|------|------|------|
| 1 |                            |      |      |      |      |      |      |
| 2 |                            |      |      |      |      |      |      |
| 3 |                            |      |      |      |      |      |      |
| 4 |                            |      |      |      |      |      |      |
| 5 | Cuts, punctures, bites     | 8.1  | 15.2 | 12.5 | 13.4 | 13.7 | 10.3 |
| 6 | Scrapes, bruises, blisters | 5.1  | 11.7 | 8.5  | 5.4  | 11.7 | 9.1  |
| 7 | Other                      | 10.1 | 11.6 | 11.0 | 11.0 | 9.0  | 8.7  |
| 8 |                            |      |      |      |      |      |      |
| 9 |                            |      |      |      |      |      |      |

10 <sup>1</sup> wt%--Weighted percentages making rates representative of the Canadian population

11 <sup>2</sup> Number of ALI in study population

---

12  
13  
14  
15  
16  
17  
18  
19  
20  
21  
22  
23  
24  
25  
26  
27  
28  
29  
30  
31  
32  
33  
34  
35  
36  
37  
38  
39  
40  
41  
42  
43  
44  
45  
46  
47  
48  
49  
50  
51  
52  
53  
54  
55  
56  
57  
58  
59  
60

For peer review only



**Table 5: Odds ratios (OR) and 95% confidence interval (C.I.) of ALI by life style and socioeconomic status, adjusted for sex and age, NPHS, Canada, 1996-2006**

|                                         |                    | 1996 |           | 1998 |           | 2000 |           | 2002 |           | 2004 |           | 2006 |           |
|-----------------------------------------|--------------------|------|-----------|------|-----------|------|-----------|------|-----------|------|-----------|------|-----------|
|                                         |                    | OR   | 95% C.I.  |
| <b>Age groups</b>                       |                    |      |           |      |           |      |           |      |           |      |           |      |           |
|                                         | M/F                | 1.4* | 1.1 - 1.6 | 1.3* | 1.1 - 1.6 | 0.9  | 0.8 - 1.1 | 1.3* | 1.1 - 1.5 | 1.4* | 1.2 - 1.6 | 1.3* | 1.1 - 1.4 |
|                                         | 20-39              | 2.1* | 1.6 - 2.9 | 1.9* | 1.5 - 2.4 | 1.8* | 1.4 - 2.3 | 2.2* | 1.8 - 2.7 | 1.8* | 1.5 - 2.2 | 2.2* | 1.8 - 2.6 |
|                                         | 40-59              | 1.6* | 1.1 - 2.1 | 1.4* | 1.1 - 1.8 | 1.3  | 1.0 - 1.6 | 1.6* | 1.3 - 2.0 | 1.3  | 1.0 - 1.5 | 1.5* | 1.2 - 1.8 |
|                                         | 60+<br>(reference) | 1.0  | ~         | 1.0  | ~         | 1.0  | ~         | 1.0  | ~         | 1.0  | ~         | 1.0  | ~         |
| <b>Background variables<sup>2</sup></b> |                    |      |           |      |           |      |           |      |           |      |           |      |           |
| Married/<br>Common-law                  | yes/no             | 1.0  | 0.8 - 1.2 | 1.0  | 0.8 - 1.2 | 1.0  | 0.8 - 1.2 | 1.0  | 0.9 - 1.2 | 0.9  | 0.7 - 1.0 | 0.9  | 0.8 - 1.0 |
| income                                  | low/high           | 1.1  | 0.9 - 1.3 | 1.0  | 0.9 - 1.3 | 1.2  | 1.0 - 1.4 | 0.9  | 0.8 - 1.1 | 1.1  | 0.9 - 1.3 | 1.2  | 1.0 - 1.4 |
| Completed<br>High School                | yes/no             | 1.2  | 1.0 - 1.5 | 1.1  | 0.9 - 1.3 | 1.0  | 0.8 - 1.2 | 0.9  | 0.8 - 1.1 | 0.9  | 0.7 - 1.0 | 1.1  | 0.9 - 1.3 |
| Rural                                   | yes/no             | 1.1  | 0.9 - 1.4 | 1.1  | 0.9 - 1.3 | 0.9  | 0.7 - 1.1 | 1.1  | 0.9 - 1.3 | 0.8  | 0.7 - 1.0 | 1.0  | 0.8 - 1.1 |
| Non-English<br>Immigrant                | yes/no             | 0.9  | 0.7 - 1.1 | 0.9  | 0.7 - 1.0 | 0.8  | 0.7 - 1.0 | 0.8  | 0.7 - 1.0 | 0.7  | 0.6 - 0.9 | 0.8  | 0.7 - 0.9 |
|                                         | yes/no             | 0.6* | 0.5 - 0.8 | 0.7* | 0.6 - 0.9 | 0.8  | 0.6 - 1.0 | 0.8  | 0.6 - 1.0 | 0.7* | 0.5 - 0.8 | 0.7* | 0.6 - 0.9 |
| <b>Health related<sup>3</sup></b>       |                    |      |           |      |           |      |           |      |           |      |           |      |           |
| Current<br>smoking                      | yes/no             | 1.1  | 0.9 - 1.4 | 1.1  | 0.9 - 1.3 | 1.2  | 1.0 - 1.5 | 1.2  | 1.0 - 1.5 | 0.9  | 0.8 - 1.1 | 0.9  | 0.7 - 1.1 |
| Physical<br>inactivity                  | yes/no             | 0.8  | 0.7 - 0.9 | 0.8  | 0.7 - 0.9 | 0.8  | 0.6 - 0.9 | 0.9  | 0.8 - 1.1 | 0.8  | 0.7 - 0.9 | 0.8  | 0.7 - 0.9 |
| Obese                                   | yes/no             | 1.2  | 1.0 - 1.5 | 1.2  | 1.0 - 1.5 | 1.1  | 0.9 - 1.3 | 1.0  | 0.9 - 1.2 | 1.1  | 0.9 - 1.3 | 1.0  | 0.8 - 1.1 |
| Alcohol<br>drink /week                  | 9+/less            | 1.2  | 0.9 - 1.5 | 1.2* | 1.0 - 1.6 | 1.3* | 1.0 - 1.7 | 1.4* | 1.2 - 1.8 | 1.2  | 1.0 - 1.5 | 1.5* | 1.3 - 1.8 |
| Alcohol 5+ at<br>a time                 | weekly/less        | 1.3* | 1.0 - 1.5 | 1.4* | 1.2 - 1.7 | 1.4* | 1.2 - 1.7 | 1.2* | 1.0 - 1.5 | 1.3* | 1.1 - 1.5 | 1.3* | 1.1 - 1.5 |

51. For sex group, females are the reference group

52. For background variables comparison groups, the second listed group for binary variables is the reference group

53. For health-related comparison groups, the second listed group for binary variables is the reference group

54\* Means that there are statistically significant difference compared with control groups

**Table 6: life style, socioeconomic status, and health care utilization of persons with an activity limiting injury before and after the injury, NPHS, Canada, 1994-2006**

|                                                        |          | Before | During | After | p value* |        |        | N**   |
|--------------------------------------------------------|----------|--------|--------|-------|----------|--------|--------|-------|
|                                                        |          | %      | %      | %     | A vs B   | B vs C | A vs C |       |
|                                                        |          | A      | B      | C     |          |        |        |       |
| <b>Risky behaviours and socioeconomic status</b>       |          |        |        |       |          |        |        |       |
| Income                                                 | low      | 36.3   | 32.1   | 28.5  | <0.001   | <0.001 | <0.001 | 2,892 |
| Obese                                                  | obese    | 17.8   | 19.7   | 22.4  | 0.005    | <0.001 | <0.001 | 1,780 |
| Physical activity                                      | inactive | 50.4   | 47.1   | 48.1  | 0.001    | 0.197  | 0.343  | 3,044 |
| Smoking                                                | current  | 19.0   | 18.5   | 18.2  | 0.265    | 0.384  | 0.077  | 1,693 |
| Alcohol drinking                                       | 9+/week  | 9.6    | 10.7   | 11.2  | 0.048    | 0.535  | 0.349  | 3,548 |
| <b>Health-related issues</b>                           |          |        |        |       |          |        |        |       |
| Limited activity                                       | yes      | 18.7   | 25.5   | 26.3  | <0.001   | 0.221  | <0.001 | 3,657 |
| Health status                                          | poor     | 33.1   | 36.3   | 39.6  | <0.001   | <0.001 | <0.001 | 3,653 |
| Medical Doctor                                         |          |        |        |       |          |        |        |       |
| visits                                                 | 5+/year  | 26.5   | 34.0   | 29.8  | <0.001   | <0.001 | <0.001 | 3,616 |
| Pain                                                   | yes      | 13.7   | 16.8   | 17.3  | <0.001   | 0.432  | <0.001 | 3,657 |
| Stress                                                 | yes      | 29.7   | 31.3   | 29.4  | 0.104    | 0.050  | 0.757  | 2,967 |
| <b>Medication use in past 30 days before interview</b> |          |        |        |       |          |        |        |       |
| Pain medication                                        | yes      | 61.9   | 70.2   | 70.8  | <0.001   | 0.489  | <0.001 | 3,640 |
| Sedatives                                              |          |        |        |       |          |        |        |       |
| /tranquiliser                                          | yes      | 5.7    | 7.2    | 8.1   | 0.001    | 0.055  | <0.001 | 3,639 |
| Antidepressants                                        | yes      | 4.2    | 5.9    | 6.2   | <0.001   | 0.346  | 0.403  | 3,641 |

\*P value calculated by McNemar's test

\*\* N of persons making up the matched analysis for the before and after analysis

1  
2  
3  
4  
5  
6  
7  
8  
9  
10 **Impact of Activity-Limiting Injuries based on the Canadian National Population Health Survey**  
11 **1994-2006**

12  
13 Frank Mo<sup>1</sup>, PhD; Ineke Neutel<sup>2</sup>, PhD; Howard Morrison, PhD; Doug Hopkins, BA; Caroline Da Silva,  
14 BSc; Ying Jiang<sup>1</sup>, MSc  
15

16 **Author references:**  
17

---

18 <sup>1</sup>Consumer Product Safety and Injury Risk Assessment Program Working Group  
19 Science Integration Division  
20 Centre for Chronic Disease Prevention and Control  
21 Public Health Agency of Canada  
22

23 <sup>2</sup>Department of Epidemiology and Community Medicine, Faculty of Medicine, University of Ottawa  
24  
25  
26  
27  
28  
29

30 **KEYWORDS** Activity limiting injury; impact factors, longitudinal health survey; epidemiology;  
31 injury prevention; Canada.  
32  
33

34 **Correspondence to**  
35

36 Dr. Frank Mo, Science Integration Division  
37 Centre for Chronic Disease Prevention and Control  
38 Public Health Agency of Canada  
39 Frank.Mo@phac-aspc.gc.ca.  
40  
41

42 **Running title:** Impact of Activity-Limiting Injury trends  
43

44 **Word count:**

45 Abstract: 300  
46 Manuscript: 3,496  
47  
48  
49  
50  
51  
52  
53  
54  
55  
56  
57  
58  
59  
60

## ABSTRACT

**Objective:** To examine the prevalence and factors affecting activity-limiting injuries (ALI) on individuals and on the Canadian population; to estimate the short and long term impact on health status and well-being due to ALI in Canada from 1994 to 2006 using the Canadian National Population Health Survey (NPHS).

**Design:** The NPHS is a randomised longitudinal cohort study with biennial interviews, with information on age, sex, education, marital status, income, residence, height and weight to self-perceived health status, health care utilization and medication use in addition to ALI.

**Setting:** The study population was a random sample of male and female participants 20 years and older from ten provinces and three territories in Canada.

**Primary and secondary outcome measures:** Logistic regression models were used to assess the potential impact of ALI on individuals and on the Canadian population. The interviews two years before and two years after the ALI were compared to examine long-term effects, and the McNemar test option in SAS was used for the matched analysis.

**Results:** The immediate impacts of ALI were pain, disability, and disruption of regular life. Long-term effects in patients were chronic pain and increased medical doctor visits. Population impact included a considerable increase in health care access and cost. The odds ratios (ORs) for the 20-39 age group compared to those 60+ was OR, 2.2; 95% CI, 1.8-2.7, while the OR associated with being male was 1.4; 95% CI, 1.1-1.6. Individuals consuming nine or more alcoholic drinks per week were also significantly more likely to report an ALI (OR, 1.5; 95% CI, 1.3-1.8).

**Conclusion:** The findings from this study illustrated the immediate and long term impact of individuals and population level injuries in Canada. Injury control policies should aim to prevent the both the number of injuries fatalities as well as the consequences among survivors.

## Summary Boxes:

What is already known on this subject?

1. Activity-limiting injuries (ALI) burden such as increased steadily prevalence, mortality and economic costs in Canada;
2. Showing increasing trends in obesity, limited activity, poor health status, medication use related to ALI;
3. Nature and types related to ALI;

What does this study add?

1. Potential associations between health care utilization and ALI before and after injury;
2. Hospital admission, Department emergency and medical doctors visits impacted on ALI;

3. The immediate individuals impact such as pain, disability, disruption of regular life. Long-term effects in patients were sequelae, chronic pain, and increased medical doctor visits after ALI. Population impact included loss of productivity and a considerable increase in health care access and cost.
4. policies should aim to prevent both the number of injuries fatalities as well as the consequences among survivors.

**Competing Interest:**

None to declare.

**Funding Statement:**

This research received no specific grant from any funding agency in the public, commercial or not-for-profit sectors.

**Contributorship Statement:**

Dr. Frank Mo, leader of the research project, and play the major role in research design, drafted the article and critical review, and advising for data analysis and results interpretation.

Dr. Ineke C. Neutel, contributed to data analysis, assisted in research design and data analysis, interpretation, and the report.

Dr. Howard Morrison, contributed to research consultation, provided critical review comments, and advising for data analysis and revised critically the article.

Mr. Doug Hopkins, assisted in research design, provided literature review and critical comments and signed final version of the manuscript.

Ms. Caroline Da Silva, participated in research design, provided critical review comments and signed final version of the manuscript.

Ms. Ying Jiang, contributed to research design, provided literature and critical review comments, and signed final version of the manuscript for submission.

## INTRODUCTION

Injuries are a serious public health issue with a major impact on the lives of Canadians. They are leading causes of death and hospitalization, as well as of disability, loss of productivity and potential years of life lost (PYLL) [1-4]. Sequelae from injuries include activity limitation, functional disability and pain which in turn influence a variety of social, psychological, labour force, and economic factors [5-8]. An analysis of emergency department (ED) visits and hospitalisation admissions for Ontario noted that one in four ED visits were injury-related, as were one in every 17 hospitalisations [9]. These data accentuated the importance of injuries to the health care system. Other studies have demonstrated the increasing medical doctor (MD) contacts, the use more medications for pain, more days in hospital, and more hours of home care services [9-11].

Several studies of traumatic disability have also focused on injuries resulting in hospitalization [12], types of injury [13-14], and serious head injuries [15]. One study reported that half of patients had some limitation in activity for two days or more due to injury, and patients treated in the clinic were somewhat more likely to have two or more days of limited activity than were patients treated in the ED [16].

Injuries are not only largely preventable, but the impact of injuries can usually be lessened. To develop effective policies leading to the prevention of injuries and to reduce the impact of injuries on society, information is needed about the influenced effects that individuals with injuries treated in the primary care setting and not requiring hospitalization frequently result in significant functional

1  
2  
3  
4  
5  
6  
7  
8  
9  
10 impairment and to identify those injuries which, by virtue of their contribution to disability, would be  
11 targets for prevention programs.  
12

13  
14  
15 The objectives of this study are to explore the immediate and longer term consequences of injury  
16 including physical, psychological, social and occupational functioning. This comprises a longitudinal  
17 population health study, which will measure the impact of injuries on individual's and population level  
18 health status and well-being due to activity-limiting injuries (ALI) in the NPHS from 1994 to 2006 in  
19 Canada.  
20  
21  
22  
23  
24  
25  
26

## 27 **METHODOLOGY**

### 28 **Study population**

29  
30 The source population for this study was the Canadian National Population Health Survey  
31 (NPHS), from 1994/1995 (cycle 1) to 2006/2007 (cycle 7). The study population was designed to be  
32 representative of the Canadian population with the exception of persons living on Indian reserves or on  
33 Canadian Forces bases [9, 11]. The sample design was a multiple cluster [17], ideal for controlling costs  
34 when personal interviews are needed, as was the case for cycle 1 of the NPHS. To cover as much as  
35 possible of the Canadian population, separate components of the survey were also carried out in the  
36 Territories and in health care institutions. In the Territories, a simpler stratified design was used. As  
37 well, anticipating the creation of Nunavut, separate strata were formed for each of the future territories,  
38 Nunavut and NWT [17]. The sampling frame for the first cycle (1994/5) originated with the Canadian  
39 Labour Force Survey (CLFS), a multi-stage, stratified sampling technique used for all provinces except  
40 Quebec for which a provincial sampling frame was used [17]. From the 2000 cycle onward, additional  
41  
42  
43  
44  
45  
46  
47  
48  
49  
50  
51  
52

1  
2  
3  
4  
5  
6  
7  
8  
9  
10 questions were added to the questionnaire, such as more detailed questions on health care use after the  
11 ALI, with the result that some analyses are restricted to data from 2000 to 2006  
12  
13

14  
15 Nearly all respondents were re-interviewed biennially by telephone except for individuals  
16 without a telephone, for whom face to face interviews were used. Interviewers were instructed to follow  
17 all reasonable strategies to trace people. Response rates were 83.6% for cycle one, 92.8% for cycle two,  
18 88.3% for cycle three, 84.9% for cycle four, 80.8% for cycle five, 77.6% for cycle six and 77.0% for  
19 cycle seven.  
20  
21  
22  
23  
24  
25

26  
27 To look at ADIs resulting from new injuries, data for cycles from 1996 to 2006 were used; data  
28 for 1994 was only used for the “before and after” analysis (Table 6). Data were used from respondents  
29 who were willing to share their data for data analysis, who completed all interviews to date, and who  
30 achieved the age of 20 before 2006. Since the source population, i.e. the total NPHS population,  
31 covered more ages than the population analysed for this study, it was possible to add younger persons  
32 from the source population to our study population after the cycle at which they reached age of 20 years  
33 old. Consequently, the study population changed somewhat over the years of the study allowing  
34 comparable cross-sectional analysis of populations with the same age range and age distribution.  
35  
36  
37  
38  
39  
40  
41  
42

#### 43 **Variables**

44  
45 The interview ranged from background questions (age, sex, education, marital status, income,  
46 residence, height and weight) to health-related questions (self-perceived health status, health care  
47 utilization and medication use). Body mass index (BMI) was calculated as weight in kilograms divided  
48  
49  
50  
51



1  
2  
3  
4  
5  
6  
7  
8  
9  
10 by height in meters squared [18]. A BMI of 30 or over was considered obese. Respondents were asked  
11 to rate their health as one of five categories: excellent, very good, good, fair or poor and for this study,  
12 the lower two categories were combined as poorer health and the top three as good health. Depression  
13 and stress were measured by the following questions: "have you had 2 weeks in a row during the past 12  
14 months when you were sad, blue, or depressed?" and "During the past month, about how often did you  
15 feel: ... so sad that nothing could cheer you up? ... nervous? ... restless or fidgety? ... hopeless?...  
16 worthless?". A question about number of visits to any type of physician or medical specialist in the past  
17 year was dichotomized as: "five or more visits, versus fewer than five visits". Alcohol consumption was  
18 based on a series of question on the number of drinks consumed each day of the past seven days before  
19 the interview. For this study, this was expressed as drinking nine or more drinks per week, versus  
20 drinking eight or less. In this study, "alcohol used 5+ at a time" was defined as "How often in the past  
21 week have you had 5 or more drinks on one occasion?". The variable "hospital treatment" was  
22 described as "Did you receive any medical attention for this injury from a health professional within 48  
23 hours?" For example, doctor, hospital emergency room. Quartiles of total household income were  
24 calculated for the study population, with the lower two quartiles combined for the low income category  
25 to be compared to the top two as the high income category. A Physical activity index was calculated  
26 based on kilocalories per kilogram of body weight per day expended (KKD). Physically active was  
27 defined as energy expenditure of at least 3 KKD; and physically inactive was defined as less than 1.5  
28 KKD. Medication use was elicited by the question: "In the past 30 days, did you take . . . ?" This was  
29 followed by a series of questions, such as "Did you take antidepressants and or anti-stressants?" "Did  
30 you take anything for pain?" A 'no' answer to the question "Are you usually free of pain and  
31 discomfort?" was taken as indication that the respondent often suffered pain.  
32  
33  
34  
35  
36  
37  
38  
39  
40  
41  
42  
43  
44  
45  
46  
47  
48  
49  
50

1  
2  
3  
4  
5  
6  
7  
8  
9  
10 The definition of injury in the NPHS data was “In the past 12 months, did you have any injuries  
11 serious enough to limit your normal activities?” If more than one injury, the following questions were to  
12 refer to the most serious one. A separate question asked respondents a general question about  
13 limitations in activity, “Because of a long-term physical or mental condition or a health problem, have  
14 you limited in the kind or amount of activity you could do: at home? at school? at work? in other  
15 activities?”. Otherwise, they should be defined as non-activity limiting.  
16  
17  
18  
19  
20  
21  
22

### 23 **Data Analysis**

24 For the statistical analysis, SAS version 9.2 (SAS Institute, Cary, NC, USA) was used. Logistic  
25 regression was used to calculate odds ratios (OR) with the presence/absence of ALI as the dependent  
26 variable, adjusted for age (in single years) and sex. Since the data were collected as a statistical sample  
27 of the Canadian population, the ‘weight’ option was used in all SAS statistical analyses to make the  
28 results representative of the Canadian population from 1994 to 2006 in seven cycles of cross-sectional  
29 studies. Weights were provided by Statistics Canada according to their sampling procedures. In order to  
30 produce a meaningful estimate of the variance for the weighted results, the weights were adjusted using  
31 the formula: [average weight = (sample weight/sum of the sample weights) \* sample size].  
32  
33  
34  
35  
36  
37  
38  
39

40 In order to determine the characteristics, life style and health status, medical attention and health  
41 care utilization as well as activity limitation and disability, which were impacted by ALI, all new injury  
42 cases, i.e., those who had not reported an injury in the previous interview were identified. For each new  
43 case, data from three cycles were selected, 1) the cycle before reporting, 2) the cycle of reporting, 3) the  
44 cycle after reporting. Data for the 1994 cycle were used only in this ‘before and after’ analysis. Only  
45 the first recorded ALI report per person was included. The McNemar test option in SAS was used for  
46  
47  
48  
49  
50  
51  
52  
53  
54  
55  
56  
57  
58  
59  
60

1  
2  
3  
4  
5  
6  
7  
8  
9  
10 matched analysis. This study approved by the research ethics committee of Health Canada.

## 11 12 13 **RESULTS**

14  
15 The numbers of ALI in the study population increased from 755 cases in 1996 to 1,006 in 2006  
16  
17 .The weighted prevalence of all ALI increased steadily from 10.5% in 1996 to 12.8% in 2006. Those  
18  
19 reporting ALI showed increasing trends in obesity, limited activity, poor health status, people who live  
20  
21 in the rural areas and drank more than 9 drinks per week, medication use, and potential injury sequelae,  
22  
23 such as pain, stress ~~and depression~~ but declining trends in lower income, ~~and~~ current smoking, and  
24  
25 immigrants (Table 1). The proportion of injuries which resulted in activity limitations were higher for  
26  
27 males, and increased more over time than for females (Table 2). Furthermore, younger adults (20-49  
28  
29 yrs.) were more likely to report activity limiting injuries (12.2% to 14.0%) compared to older (50+ yrs.)  
30  
31 adults (8.6% to 9.8%). Among respondents who reported a ALI, the weighted percentages who reported  
32  
33 five or more visits to a medical doctor (MD) within the previous year decreased from 29.8% in 2000 to  
34  
35 25.3% in 2006, emergency department (ED) visits went from 34.0% to 28.8%, and hospital admission  
36  
37 within 48 hours after the injury went from 6.5% to 4.9% (Table 3). The rate of hospital admissions  
38  
39 within 48 hours for adults aged 50+ years was higher than that of young aged (20-49) group.

40  
41  
42 The most frequently reported injuries resulting in activity limitation were sprains and strains  
43  
44 (42%), followed by fractures and dislocations (20%), and cuts, punctures and bites (10%) (Table 4).  
45  
46 Only 3.3 to 5.0% of ALIs were in the category of brain, internal and multiple injuries. Men tended to  
47  
48 have more cuts, punctures and bites while women had more scrapes, bruises and blisters. Younger ages  
49  
50 tended to have more sprains and strains and older ages more fractures and dislocations.

1  
2  
3  
4  
5  
6  
7  
8  
9  
10  
11  
12 Logistic regression analysis indicated that younger age groups and male participants were more  
13 impacted by ALI. Only a few of the other variables showed associations with ALI - immigrants had  
14 consistently lower rates of ALI, while people consumed nine or more alcoholic drinks per week had  
15 significantly higher rates (Table 5).  
16  
17  
18  
19

20  
21 Attributes of persons with an ALI were compared in the cycles before and after their injury  
22 (Table 6). Most behavioural risk factors examined showed a pattern of an increase from the two years  
23 previous to the ALI to the time of the ALI to a further increase the two years after the ALI. A similar  
24 pattern was observed for health status and interactions with the health care system. (Table 6).  
25  
26  
27  
28  
29

## 30 DISCUSSION

31  
32 Based on NPHS data, more than 10% of the adult Canadian population annually experience an  
33 ALI, with the proportion increasing from 10.5% in 1996 to 12.8% in 2006. According to the definition  
34 of ALI as activity-limiting injuries, all people with ALI experienced a certain amount of disruption of  
35 their daily activities with the impact varying according to the type and severity of their injury and  
36 depending on their customary type of activity [19-22]. About 20% of ALIs were fractures and  
37 dislocations, many of whom necessitated a period of altered activity. Older people were more likely to  
38 report fractures than the younger age groups. The most common injuries were sprains and strains, the  
39 impact of which also varied a great deal depending on type and severity [23-24]. An important impact  
40 of injuries is on the workplace through absenteeism and on the family through the disruption of  
41 customary activities [25-26]. Besides the impact of injuries on every day activities, there was also the  
42  
43  
44  
45  
46  
47  
48  
49  
50  
51  
52

1  
2  
3  
4  
5  
6  
7  
8  
9  
10 impact on the health care system [27]. In our data, in 2000, about two thirds of people with ALI sought  
11 some kind of medical care. Evidence was presented showing that the impact of ALI might be even more  
12 far-reaching, as seen by the higher levels of medical care, and continued pain remaining two years after  
13 the ALI were reported.  
14  
15  
16

17  
18  
19 Other research on injuries has used a variety of definition of injuries, based on different sources  
20 of information. Questions in the NPHS were able to put these other measures in perspective. For  
21 example, some studies used hospital-based data [28], but the present study showed that only about 5% of  
22 ALI were resulted in a hospital admission within the first 48 hours after the event. Assuming that all  
23 injuries that required hospitalization were within the activity-limiting rubric, it is clear that studies using  
24 only hospital data would include only a small portion of important injuries [29]. However, the  
25 hospitalized injuries will be the more severe injuries which are responsible for a disproportional share of  
26 the health care cost and disability [25]. Other studies have used ED visits as a unit of measurement [9].  
27 The present study showed less than one third of ALI went to an ED to obtain treatment. Again, the latter  
28 were the more severe injuries or those needing specialized treatment, e.g., casts on fractures, and thus  
29 had a greater impact on daily life and cost. Another source of data commonly used has been mortality  
30 data. Although deaths are definitely activity-limiting, obviously, none were included in this study. Fatal  
31 injuries reflect a different range of injuries than those for ALI. For example, in an US study, firearm-  
32 related injuries were 22% of all injury deaths, second only to traffic accident related injuries, but  
33 firearms amounted to less than 1% for non-fatal injuries [11]. Thus, different measuring units for  
34 measuring injury rates will target different slices of the spectrum of injuries and provide different results.  
35 ALI are of special public health importance, but are not sufficiently studied.  
36  
37  
38  
39  
40  
41  
42  
43  
44  
45  
46  
47  
48  
49  
50

1  
2  
3  
4  
5  
6  
7  
8  
9  
10  
11  
12 Another level of impact resulting from ALI would consist of impact on the health care system.  
13  
14 Approximately 60% of people with ALI obtained medical care of some type. Of these, approximately  
15  
16 one third of persons with ALI went to ED to experience the often long wait before receiving treatment.  
17  
18 Back at home the patient would not only experience the pain and disability of the ALI, but also the need  
19  
20 to negotiate the health care system, such as making appointments with physicians, specialists,  
21  
22 physiotherapists, etc., finding transportation, often needing someone to accompany them [30-33]. Even  
23  
24 though the proportion of the population with ALI increased over the years 2000-2006, decreases were  
25  
26 seen in use of primary care and the hospital ED visits as well as hospitalisation. This decrease in health  
27  
28 care use could be an indication either of greater difficulty in accessing health care, or that the nature of  
29  
30 ALIs has moderated over the years. Berdahl found variation by ethnic group and sex, both in the  
31  
32 reporting of work-related injuries and in the seeking of medical care and the change in ethnic  
33  
34 composition over the years could also be a factor in the NPHS data [34-36]. In any case, ALI are  
35  
36 suffered by a large proportion of the population annually, and a majority of these seek medical treatment  
37  
38 whether primary care, ED or hospital care. Clearly, this entails a large cost to the health care system and  
39  
40 any prevention would not only improve quality of life of the putative victims but also would result in  
41  
42 significantly lower health care costs.

43  
44 Another type of impact would be long-term changes after the injury. The 'before and after' data  
45  
46 available in the NPHS consisted of comparing the cross-sectional data from the interview cycle before  
47  
48 the ALI with the data of the cycle reporting the ALI and with the next cycle after the ALI. While the  
49  
50 interviews for each respondent could be linked for the 'before and after' cycles it was more difficult to  
51  
52

1  
2  
3  
4  
5  
6  
7  
8  
9  
10 determine which changes in attributes in the year of the ALI or subsequent years were sequelae of the  
11 ALI. For example, it might make sense that the increasing obesity for people with ALI be linked to  
12 after-effects, e.g. [37], due to inactivity resulting from the ALI but, in fact, similar changes were  
13 happening in the overall population. Given these caveats, we can note that no changes were found for  
14 smoking and little change in excessive alcohol use. Most likely to show long-term effects due to ALI  
15 were visits to medical doctors and ongoing pain. People with ALI showed increasing likelihood of  
16 visiting a MD at least five times during the year which continued for the subsequent cycle. Similarly  
17 pain increased in the cycle with the ALI and remained high over the years. Although this is weak  
18 evidence, it confirms work on long-term effects of other researchers [38-39] and again emphasizes the  
19 impact of ALI in the population.  
20  
21  
22  
23  
24  
25  
26  
27  
28  
29

30 Injuries have been found to lead to lost productivity, medical costs, compensation costs and  
31 long-term health problems and disability [40-42], which was confirmed by the present results for the  
32 Canadian population. Many injuries can be prevented and a better understanding of all aspects of  
33 injuries will lead to better ways of prevention or the minimizing of their effects. However, collaboration  
34 and cooperation is needed [43]. The European Union has committed itself to reducing number of traffic  
35 fatalities from 45,000 to 25,000 by 2010, which as several reports point out, will require strong measures  
36 against use of alcohol [44-47] and illicit and medicinal drugs before driving [48]. A difficulty in injury  
37 prevention is the multi-faceted aspect of injuries. For example, a fall may have many causes, such as  
38 unsafe working conditions or slippery stairs at home. Each of these issues would require different  
39 approaches to prevention. Similar diversities are found for most other types of injuries. With all  
40 difficulties inherent in devising effective interventions, prevention is still the best approach to lower the  
41  
42  
43  
44  
45  
46  
47  
48  
49  
50  
51  
52

1  
2  
3  
4  
5  
6  
7  
8  
9  
10 tremendous impact of ALI on the Canadian population.  
11

12  
13 The NPHS data have important strengths, such as its representativeness of the Canadian  
14 population and its longitudinal nature. Because of the longitudinal design, it was possible to identify  
15 new ALI, meaning no ALI in the previous interview, and compare risk factors before and after the event,  
16 as well as its consequences. The 'before and after' comparisons of the same person allowed for matched  
17 analysis at different times. Important also is the extensive and consistent information available on each  
18 respondent over the multiple cycles of the survey, such as type of ALI, and the medical care needed.  
19 Besides strengths, the NPHS also has limitations. One issue is the lack of distinction between intentional  
20 and unintentional injuries. Another issue is that of self-reported data. Part of self-reporting is recall of  
21 events. Recall of having had an ALI has been shown elsewhere to be less accurate with increasing time  
22 and is also likely to vary with the severity of the injury [49-50]. Both of these would likely lead to an  
23 under-reporting of ALI. In spite of its limitations the NPHS gives an invaluable view of the level of  
24 serious injury in the Canadian adult population over a 12 year time period.  
25  
26  
27  
28  
29  
30  
31  
32  
33  
34  
35  
36  
37

38 Another strength of these data is the use of ALI as a measurement of injury. There are various  
39 units of measurement in measuring rates of injury in a population. The unit of measurement used in the  
40 present study consists of the most serious ALI over the previous 12 months, excluding repetitive strains  
41 injuries. The use of ALI means the delimitation of a particular kind of injury in the spectrum of injuries  
42 as a concept meaningful to both respondent and researchers. In addition, it identifies a type of injury  
43 sufficiently severe to impact a person's regular routine.  
44  
45  
46  
47  
48  
49  
50  
51  
52  
53  
54  
55  
56  
57  
58  
59  
60



1  
2  
3  
4  
5  
6  
7  
8  
9  
10  
11  
12  
13  
14  
15  
16  
17  
18  
19  
20  
21  
22  
23  
24  
25  
26  
27  
28  
29  
30  
31  
32  
33  
34  
35  
36  
37  
38  
39  
40  
41  
42  
43  
44  
45  
46  
47  
48  
49  
50  
51  
52  
53  
54  
55  
56  
57  
58  
59  
60

**CONCLUSION**

The findings from this study quantified the immediate and long term impact of individuals and population level injuries in Canada. The immediate impact was pain, disability, and disruption of regular life. Long-term effects in patients were chronic pain and increased medical doctor's visits remaining two years after the ALI. Population impact included loss of productivity and a considerable increase in health care access and cost. This study also particularly contributes to injury prevention in social and psychological health services to help injured people make a better recovery and maintain the quality of life after injuries.

1  
2  
3  
4  
5  
6  
7  
8  
9  
10 **REFERENCES**

- 11 1. Centre for Surveillance Coordination HC. Injury Surveillance in Canada: Current realities and  
12 Challenges. Ottawa: 2003; Health Canada.
- 13 2. Holtslag HR, Beeck EF van, Lichtveld RA, et al. Individual and population burdens of major trauma  
14 in the Netherlands. *Bull World Health Organ* 2008; 86:111–117.
- 15 3. Lyons RA, Kendrick D, Towner EM, et al. Measuring the Population Burden of Injuries—  
16 Implications for Global and National Estimates: A Multi-centre Prospective UK Longitudinal Study.  
17 *PLoS Med* 2011; 8(12): e1001140. doi:10.1371/journal.pmed.1001140.
- 18 4. Rivara FP, Thompson RS, Thompson, DC Calonge N. Injuries to Children and Adolescents: Impact  
19 on Physical Health. *Pediatrics* 1991;88:783-788.
- 20 5. Frank JW, Brooker AS, DeMaio S et al. Disability resulting from occupational low back pain part II:  
21 What do we know about secondary prevention? A review of the scientific evidence on prevention after  
22 disability begins. *Spine* 1996; 21(24):2918–2929.
- 23 6. Krause N, Frank JW, Dasinger LK et al. Determinants of duration of disability and return to work  
24 after work-related injury and illness: Challenges for future research. *Am J Ind Med* 2001;40:464–484.
- 25 7. Krause N, Ragland DR. Occupational disability due to low back pain: A new interdisciplinary  
26 classification based on a phase model of disability. *Spine* 1994;19(9):1011–1020.
- 27 8. Verbrugge LM, Jette AM. The disablement process. *Soc Sci Med* 1994;38(1):1–14.
- 28 9. MacPherson AK, Schull M, Manuel D et al. Injuries in Ontario: ICES Atlas. Toronto: Institute for  
29 Clinical Evaluative Sciences 2005;
- 30 10. MacKenzie EJ. Epidemiology of injuries: current trends and future challenges. *Epidemiol Rev* 2000;  
31 22:112-9.
- 32 11. Schneier AJ, Shields BJ, Hostetler SG et al. Incidence of Pediatric Traumatic Brain Injury and  
33 Associated Hospital Resource Utilization in the United States. *Pediatrics*. 2006;118 (2):483-492.
- 34 12. Mayer T, Walker ML, Clark P. Further experience with a modified Abbreviated Injury Severity  
35 Scale. *J Trauma*. 1984;24:31-34.
- 36 13. Kraus JF, Fife D, Conroy C. Pediatric brain injuries: the nature, clinical course, and early outcomes  
37 in a defined United States' population. *Pediatrics*. 1987;79:501-507.
- 38 14. Casey R, Ludwig S, McCormick MC. Morbidity following minor head trauma in children.  
39 *Pediatrics*. 1986;78:497-502.

- 1  
2  
3  
4  
5  
6  
7  
8  
9  
10  
11 15. Kraus JP, Fife D, Cox P et al. Incidence, severity and external causes of pediatric brain injury.  
12 AJDC. 1986;140:687-693.
- 13  
14 16. Rivara FP, Calonge N, and Thompson R. Population-Based Study of Unintentional Injury Incidence  
15 and Impact during Childhood. *Am J Public Health* 1989;79:990-994.
- 16  
17 17. Tambay J-L, Catlin G. Sample design of the National Population Health Survey. *Health Reports*  
18 2006;7(1):29-38.
- 19  
20 18. World Health Organization. What are overweight and obesity? Factsheet 2006; N° 311.
- 21  
22 19. Majori S, Ricci G, Capretta F et al. Epidemiology of domestic injuries. A survey in an emergency  
23 department in North-East Italy. *J Prev Med Hyg.* 2009;50:164-9.
- 24  
25 20. Scheiman S, Moghaddas HS, Bjornstig U et al. Bicycle injury events among older adults in Northern  
26 Sweden: a 10-year population based study. *Accid Anal Prev* 2010;42:758-63.
- 27  
28 21. Ahmed LA, Schirmer H, Bjornerem A et al. The gender- and age-specific 10-year and lifetime  
29 absolute fracture risk in Tromso, Norway. *Eur J Epidemiol* 2009;24:441-8.
- 30  
31 22. Ahmed LA, Emaus N, Berntsen GK, et al. Bone loss and the risk of non-vertebral fractures in  
32 women and men: the Tromso study. *Osteoporos Int.* 2010;21: 1503-11.
- 33  
34 23. Aschkenasy MT, Rothenhaus TC. Trauma and falls in the elderly. *Emerg Med Clin North Am* 2006;  
35 24:413-32.
- 36  
37 24. Wilkins K. Medications and fall-related fractures in the elderly. *Health Rep* 1999;11:45-53.
- 38  
39 25. Kendrick D, Vinogradova Y, Coupland C, et al. Getting back to work after injury: the UK Burden of  
40 Injury multicentre longitudinal study. *BMC Public Health* 2012;1 (12):584.
- 41  
42 26. Kendrick D, Vinogradova Y, Coupland C, et al. Making a successful return to work: the UK burden  
43 of injury multicentre longitudinal study. *Br J Gen Pract* 2012 Feb; 62(595):e82-  
44 90.10.3399/bjgp12X625139.
- 45  
46 27. Franche RL, Krause N. Readiness for Return to Work Following Injury or Illness: Conceptualizing  
47 the Interpersonal Impact of Health Care, Workplace, and Insurance Factors. *JOccup Rehabil* 2002;  
48 December 12 (4):233-256.
- 49  
50 28. Frisina PG, Guellnitz R, Alverzo J. A time series analysis of falls and injury in the inpatient  
51 rehabilitation setting. *Rehabil Nurs* 2010;35:141-6.
- 52  
53  
54  
55  
56  
57  
58  
59  
60

- 1  
2  
3  
4  
5  
6  
7  
8  
9  
10 29. Pickett W, Hartling L, Brison RJ. A population-based study of hospitalized injuries in Kingston,  
11 Ontario, identified via the Canadian Hospitals Injury Reporting and Prevention Program. *Chronic Dis*  
12 *Can* 1997;18:61-9.
- 13  
14 30. Dryden DM, Saunders LD, Rowe BH et al. Utilization of health services following spinal cord  
15 injury: a 6-year follow-up study. *Spinal Cord* 2004; 42:513-525.
- 16  
17 31. Brown JA, Shannon HS, McDonough P et al. Healthcare Use of Families of Injured Workers Before  
18 and After a Workplace Injury in British Columbia, Canada. *Healthcare Policy* 2007; 2(3):1-124.
- 19  
20 32. Berthelot J-M and the Project Team. Injury hospitalizations and socio-economic status. Ottawa,  
21 Ontario: 2010; CIHI.
- 22  
23 33. Compston J. Osteoporosis: social and economic impact. *Radiol Clin North Am* 2010;48:477-82.
- 24  
25 34. Berdahl TA, Zodet M. Medical care utilization for work-related injuries in the United States 2002-  
26 2006. *Med Care* 2010;48:645-51.
- 27  
28 35. de Castro AB, Fujishiro K, Rue T et al. Associations between work schedule characteristics and  
29 occupational injury and illness. *Int Nurs Rev* 2010;57:188-94.
- 30  
31 36. Lombardi DA, Folkard S, Willetts JL et al. Daily sleep, weekly working hours, and risk of work-  
32 related injury: US National Health Interview Survey (2004-2008). *Chronobiol Int* 2010;27(5):1013-30.
- 33  
34 37. Bergkvist D, Hekmat K, Svensson T, et al. Obesity in orthopedic patients. *Surg Obes Relat Dis*  
35 2009; 5:670-2.
- 36  
37 38. Cameron CM, Kliewer EV, Purdie DM et al. Long term health outcomes after injury in working age  
38 adults: a systematic review. *J Epidemiol Community Health* 2006;60:341-4.
- 39  
40 39. Toft AM, Moller H, Laursen B. The years after an injury: long-term consequences of injury on self-  
41 rated health. *J Trauma* 2010;69:26-30.
- 42  
43 40. Borgstrom F, Zethraeus N, Johnell O, et al. Costs and quality of life associated with osteoporosis-  
44 related fractures in Sweden. *Osteoporos Int* 2006;17:637-50.
- 45  
46 41. Brainsky A, Glick H, Lydick E, et al. The economic cost of hip fractures in community-dwelling  
47 older adults: a prospective study. *J Am Geriatr Soc* 1997;45:281-7.
- 48  
49 42. Hendrie D, Hall SE, Arena G et al. Health system costs of falls of older adults in Western Australia.  
50 *Aust Health Rev* 2004; 28:363-73.
- 51  
52 43. Sleet DA, Moffett DB. Framing the problem: injuries and public health. *Fam Community Health*  
53 2009;32:88-97.

1  
2  
3  
4  
5  
6  
7  
8  
9  
10  
11  
12  
13  
14  
15  
16  
17  
18  
19  
20  
21  
22  
23  
24  
25  
26  
27  
28  
29  
30  
31  
32  
33  
34  
35  
36  
37  
38  
39  
40  
41  
42  
43  
44  
45  
46  
47  
48  
49  
50  
51  
52  
53  
54  
55  
56  
57  
58  
59  
60

44. Desapriya E, Pike I, Raina P. Severity of alcohol-related motor vehicle crashes in British Columbia: case - control study. *Int J Contr Saf Promot* 2006;13:89-94.

45. Kool B, Ameratunga S, Robinson E et al. The contribution of alcohol to falls at home among working-aged adults. *Alcohol* 2008;42:383-8.

46. Kool B, Ameratunga S, Jackson R. The role of alcohol in unintentional falls among young and middle-aged adults: a systematic review of epidemiological studies. *Inj Prev* 2009; 15:341-7.

47. Ahlm K, Bjornstig U, Ostrom M. Alcohol and drugs in fatally and non-fatally injured motor vehicle drivers in northern Sweden. *Accid Anal Prev* 2009; 41:129-36.

48. Gouille JP, Verstraete A, Boulu R, et al. Illicit drugs, medications and traffic accidents. *Ann Pharm Fr* 2008;66:196-205.

49. Wilkins K, Mackenzie SG. Work injuries. *Health Rep* 2007;18:25-42.

50. Warner M, Schenker N, Heinen MA et al. The effects of recall on reporting injury and poisoning episodes in the National Health Interview Survey. *Inj Prev* 2005;11:282-7.

**Table 1: The estimated percent and univariate analyses of the characteristics related to adult Canadians reporting an activity limiting injury in the previous year based on NPHS data, 1996-2006\***

| Year                                  | 1996  | 1998  | 2000  | 2002  | 2004  | 2006  | <u>2006/<br/>1996</u> | <u>P-<br/>value</u> |
|---------------------------------------|-------|-------|-------|-------|-------|-------|-----------------------|---------------------|
| All                                   | 10.5  | 10.9  | 11.4  | 12.6  | 12.6  | 12.8  | <u>1.22</u>           | <u>0.048</u>        |
| <b>Background variables</b>           |       |       |       |       |       |       |                       |                     |
| Married/common law                    | 71.0  | 69.3  | 68.2  | 66.2  | 65.7  | 64.7  | <u>0.91</u>           | <u>0.063</u>        |
| Low income                            | 40.0  | 34.2  | 27.9  | 26.0  | 23.5  | 19.8  | <u>0.50</u>           | <u>0.039</u>        |
| Completed High School                 | 89.6  | 89.9  | 89.3  | 84.7  | 84.5  | 84.5  | <u>0.94</u>           | <u>0.068</u>        |
| Rural                                 | 17.9  | 20.5  | 21.0  | 20.6  | 19.9  | 22.0  | <u>1.23</u>           | <u>0.041</u>        |
| Immigrant                             | 17.5  | 17.3  | 16.8  | 16.2  | 16.1  | 15.7  | <u>0.90</u>           | <u>0.081</u>        |
| <b>Health related variables</b>       |       |       |       |       |       |       |                       |                     |
| Current smoking                       | 22.7  | 21.3  | 20.4  | 17.1  | 17.1  | 16.0  | <u>0.70</u>           | <u>0.153</u>        |
| Inactive                              | 58.3  | 52.9  | 56.1  | 48.3  | 51.0  | 45.9  | <u>0.79</u>           | <u>0.098</u>        |
| Obese                                 | 18.4  | 21.2  | 23.0  | 24.3  | 25.0  | 26.4  | <u>1.43</u>           | <u>0.001</u>        |
| 9+ alcohol drinks/ week               | 11.0  | 11.6  | 11.9  | 11.8  | 11.6  | 14.8  | <u>1.35</u>           | <u>0.001</u>        |
| <b>Region of residence</b>            |       |       |       |       |       |       |                       |                     |
| Atlantic                              | 8.8   | 8.7   | 8.9   | 8.8   | 8.7   | 8.7   | <u>0.99</u>           | <u>0.086</u>        |
| Quebec                                | 25.5  | 25.6  | 25.9  | 26.0  | 26.1  | 25.9  | <u>1.01</u>           | <u>0.078</u>        |
| Ontario                               | 36.3  | 36.0  | 36.0  | 35.8  | 36.1  | 36.2  | <u>1.00</u>           | <u>0.101</u>        |
| Prairies                              | 17.0  | 17.3  | 17.1  | 17.4  | 17.3  | 17.4  | <u>1.02</u>           | <u>0.098</u>        |
| BC                                    | 12.5  | 12.4  | 12.1  | 12.0  | 11.8  | 11.9  | <u>0.95</u>           | <u>0.156</u>        |
| <b>Outcome-related</b>                |       |       |       |       |       |       |                       |                     |
| Limited activity                      | 17.3  | 17.8  | 18.0  | 22.9  | 24.5  | 26.6  | <u>1.54</u>           | <u>0.001</u>        |
| Poor health status                    | 33.6  | 33.2  | 38.0  | 41.2  | 42.3  | 43.5  | <u>1.29</u>           | <u>0.035</u>        |
| 5+ Medical Doctor visits /year        | 24.2  | 26.3  | 26.6  | 27.6  | 28.3  | 26.8  | <u>1.11</u>           | <u>0.056</u>        |
| Pain                                  | 12.3  | 13.7  | 13.3  | 15.1  | 16.4  | 15.8  | <u>1.28</u>           | <u>0.039</u>        |
| Stress                                | 26.3  | 29.2  | 25.1  | 27.3  | 28.3  | 27.4  | <u>1.04</u>           | <u>0.083</u>        |
| Depression                            | 6.1   | 5.8   | 6.4   | 6.9   | 7.1   | 6.0   | <u>0.98</u>           | <u>0.158</u>        |
| <b>Medication use in last 30 days</b> |       |       |       |       |       |       |                       |                     |
| Pain medication                       | 65.6  | 67.5  | 70.1  | 70.2  | 70.4  | 70.6  | <u>1.08</u>           | <u>0.096</u>        |
| Tranquilizer/ sedative                | 5.1   | 5.3   | 6.8   | 8.1   | 8.2   | 10.0  | <u>1.96</u>           | <u>0.001</u>        |
| Antidepressants                       | 3.6   | 4.4   | 5.4   | 5.9   | 6.9   | 7.0   | <u>1.94</u>           | <u>0.001</u>        |
| Total Number <sup>1</sup>             | 7,313 | 7,529 | 7,717 | 7,875 | 8,085 | 8,324 |                       |                     |

1  
2  
3  
4  
5  
6  
7  
8  
9  
10  
11  
12  
13  
14  
15  
16  
17  
18  
19  
20  
21  
22  
23  
24  
25  
26  
27  
28  
29  
30  
31  
32  
33  
34  
35  
36  
37  
38  
39  
40  
41  
42  
43  
44  
45  
46  
47  
48  
49  
50  
51  
52  
53  
54  
55  
56  
57  
58  
59  
60

\*Univariate analysis was used to compare the trend of ALI between 1996 and 2006 in the different characteristics : P value <0.05 means a significant difference between study and control groups.

<sup>1</sup> total number of survey respondents used to calculate weighted percentages representative of the Canadian population

For peer review only

Formatted: Font: 10 pt, Not Bold

Formatted: Font: 10 pt

Formatted: Font: Bold

Formatted: Font: 10 pt

Formatted: Border: Bottom: (Single solid line, Auto, 0.5 pt Line width)

**Table 3: The percent of persons reporting specific health care use among those reporting an ALI by age group and sex, NPHS, Canada, 2000-2006\***

| Year      |                                      | 2000 | 2002 | 2004 | 2006  |
|-----------|--------------------------------------|------|------|------|-------|
| All       | Number of ALI                        | 865  | 932  | 913  | 1,005 |
| -         | Medical Doctor (MD) visits (5+/year) | 29.8 | 27.1 | 27.3 | 25.3  |
| -         | Emergency Department (ED) visits     | 34.0 | 28.5 | 31.0 | 28.8  |
| -         | Hospital admission in 48 hours       | 6.5  | 5.4  | 5.5  | 4.9   |
| -         | Other                                | 2.7  | 4.3  | 3.1  | 5.2   |
| -         | Any                                  | 66.6 | 60.0 | 61.5 | 59.3  |
| -         | None                                 | 33.5 | 40.1 | 38.5 | 40.7  |
| Males     | Number of ALI                        | 394  | 460  | 463  | 482   |
| -         | MD visits (5+/year)                  | 26.6 | 26.5 | 24.7 | 23.6  |
| -         | ED visits                            | 34.5 | 27.4 | 30.8 | 29.7  |
| -         | Hospital admission in 48 hours       | 9.5  | 4.5  | 4.6  | 4.1   |
| -         | Other                                | 4.1  | 4.0  | 2.9  | 5.3   |
| -         | Any                                  | 65.2 | 57.8 | 58.4 | 58.5  |
| -         | None                                 | 34.8 | 42.2 | 41.6 | 41.5  |
| Females   | Number of ALI                        | 471  | 472  | 450  | 523   |
| -         | MD visits (5+/year)                  | 32.6 | 27.7 | 30.5 | 27.3  |
| -         | ED visits                            | 33.6 | 29.9 | 31.3 | 27.8  |
| -         | Hospital admission in 48 hours       | 4.0  | 6.4  | 6.6  | 5.7   |
| -         | Other                                | 1.5  | 4.7  | 3.4  | 5.1   |
| -         | Any                                  | 67.7 | 62.4 | 65.2 | 60.2  |
| -         | None                                 | 32.3 | 37.6 | 34.8 | 39.7  |
| Age 20-49 | Number of ALI                        | 588  | 601  | 564  | 590   |
| -         | MD visits (5+/year)                  | 29.1 | 27.7 | 28.5 | 24.3  |
| -         | ED visits                            | 34.3 | 27.6 | 28.7 | 27.3  |
| -         | Hospital admission in 48 hours       | 6.2  | 4.1  | 2.9  | 3.6   |
| -         | Other                                | 2.5  | 4.1  | 3.1  | 7.3   |
| -         | Any                                  | 65.8 | 59.3 | 3.2  | 58.9  |
| -         | None                                 | 34.2 | 40.7 | 39.7 | 41.1  |
| Age 50+   | Number of ALI                        | 277  | 331  | 349  | 415   |
| -         | MD visits (5+/year)                  | 31.5 | 25.8 | 25.3 | 26.9  |
| -         | ED visits                            | 33.6 | 30.6 | 34.9 | 31.1  |
| -         | Hospital admission in 48 hours       | 7.3  | 8.1  | 9.9  | 6.9   |
| -         | Other                                | 3.2  | 4.9  | 3.2  | 1.9   |
| -         | Any                                  | 61.4 | 59.3 | 63.5 | 59.9  |
| -         | None                                 | 31.8 | 38.6 | 36.6 | 40.1  |

Formatted ... [1]

Formatted ... [2]

Formatted ... [3]

Formatted ... [4]

Formatted ... [5]

Formatted ... [6]

Formatted ... [7]

Formatted ... [8]

Formatted ... [9]

Formatted ... [10]

Formatted ... [11]

Formatted ... [12]

Formatted ... [13]

Formatted ... [14]

Formatted ... [15]

Formatted ... [16]

Formatted ... [17]

Formatted ... [18]

Formatted ... [19]

Formatted ... [20]

Formatted ... [21]

Formatted ... [22]

Formatted ... [23]

Formatted ... [25]

Formatted ... [24]

Formatted ... [26]

Formatted ... [27]

Formatted ... [28]

Formatted ... [29]

Formatted ... [30]

Formatted ... [31]

Formatted ... [32]

Formatted ... [34]

Formatted ... [35]

Formatted ... [36]

Formatted ... [37]

Formatted ... [40]

Formatted ... [39]

Formatted ... [42]

Formatted ... [41]

Formatted ... [44]

Formatted ... [43]

Formatted ... [46]

Formatted ... [45]

Formatted ... [48]

Formatted ... [47]

Formatted ... [49]

Formatted ... [50]

Formatted ... [52]

Formatted ... [51]

Formatted ... [54]

Formatted ... [53]

Formatted ... [56]

Formatted ... [55]

Formatted ... [58]

Formatted ... [57]



**Table 2: Percentages for ALI for which were impacted by activity limitation per year, NPHS, Canada, 2000-2006**

| Years             |                         | 2000 | 2002 | 2004 | 2006 |
|-------------------|-------------------------|------|------|------|------|
|                   | <b>Injury status</b>    |      |      |      |      |
| <b>All</b>        | None                    | 85.5 | 84.0 | 84.0 | 82.2 |
|                   | Activity limiting (yes) | 10.8 | 12.1 | 11.6 | 12.0 |
|                   | Activity limiting (no)  | 3.1  | 3.0  | 3.5  | 5.1  |
|                   | Both                    | 0.6  | 0.4  | 1.0  | 0.8  |
| <b>Males</b>      | None                    | 84.9 | 82.0 | 82.2 | 80.1 |
|                   | Activity limiting (yes) | 10.5 | 13.5 | 13.2 | 13.2 |
|                   | Activity limiting(no)   | 3.9  | 3.9  | 3.4  | 5.6  |
|                   | Both                    | 0.7  | 0.7  | 1.3  | 1.1  |
| <b>Females</b>    | None                    | 86.0 | 85.8 | 85.7 | 84.1 |
|                   | Activity limiting (yes) | 11.1 | 10.8 | 10.1 | 10.9 |
|                   | Activity limiting(no)   | 2.4  | 3.0  | 3.6  | 4.6  |
|                   | Both                    | 0.5  | 0.4  | 0.7  | 0.5  |
| <b>Ages 20-49</b> | None                    | 83.5 | 81.7 | 81.2 | 79.3 |
|                   | Activity limiting (yes) | 12.2 | 13.9 | 13.3 | 14.0 |
|                   | Activity limiting(no)   | 3.5  | 3.7  | 4.3  | 5.8  |
|                   | Both                    | 0.8  | 0.7  | 1.3  | 0.9  |
| <b>Ages 50+</b>   | None                    | 88.5 | 87.2 | 87.4 | 85.3 |
|                   | Activity limiting (yes) | 8.6  | 9.5  | 9.5  | 9.8  |
|                   | Activity limiting (no)  | 2.6  | 3.1  | 2.5  | 4.2  |
|                   | Both                    | 0.3  | 0.3  | 0.6  | 0.6  |

Formatted Table

**Table 3: The percent of persons reporting specific health care use among those reporting an ALI by age group and sex, NPHS, Canada, 2000-2006\***

| <u>Year</u>      |                                             | <u>2000</u> | <u>2002</u> | <u>2004</u> | <u>2006</u>  |
|------------------|---------------------------------------------|-------------|-------------|-------------|--------------|
| <u>All</u>       | <u>Number of ALI</u>                        | <u>865</u>  | <u>932</u>  | <u>913</u>  | <u>1,005</u> |
| -                | <u>Medical Doctor (MD) visits (5+/year)</u> | <u>29.8</u> | <u>27.1</u> | <u>27.3</u> | <u>25.3</u>  |
| -                | <u>Emergency Department (ED) visits</u>     | <u>34.0</u> | <u>28.5</u> | <u>31.0</u> | <u>28.8</u>  |
| -                | <u>Hospital admission in 48 hours</u>       | <u>6.5</u>  | <u>5.4</u>  | <u>5.5</u>  | <u>4.9</u>   |
| -                | <u>Other</u>                                | <u>2.7</u>  | <u>4.3</u>  | <u>3.1</u>  | <u>5.2</u>   |
| -                | <u>Any</u>                                  | <u>66.6</u> | <u>60.0</u> | <u>61.5</u> | <u>59.3</u>  |
| -                | <u>None</u>                                 | <u>33.5</u> | <u>40.1</u> | <u>38.5</u> | <u>40.7</u>  |
| <u>Males</u>     | <u>Number of ALI</u>                        | <u>394</u>  | <u>460</u>  | <u>463</u>  | <u>482</u>   |
| -                | <u>MD visits (5+/year)</u>                  | <u>26.6</u> | <u>26.5</u> | <u>24.7</u> | <u>23.6</u>  |
| -                | <u>ED visits</u>                            | <u>34.5</u> | <u>27.4</u> | <u>30.8</u> | <u>29.7</u>  |
| -                | <u>Hospital admission in 48 hours</u>       | <u>9.5</u>  | <u>4.5</u>  | <u>4.6</u>  | <u>4.1</u>   |
| -                | <u>Other</u>                                | <u>4.1</u>  | <u>4.0</u>  | <u>2.9</u>  | <u>5.3</u>   |
| -                | <u>Any</u>                                  | <u>65.2</u> | <u>57.8</u> | <u>58.4</u> | <u>58.5</u>  |
| -                | <u>None</u>                                 | <u>34.8</u> | <u>42.2</u> | <u>41.6</u> | <u>41.5</u>  |
| <u>Females</u>   | <u>Number of ALI</u>                        | <u>471</u>  | <u>472</u>  | <u>450</u>  | <u>523</u>   |
| -                | <u>MD visits (5+/year)</u>                  | <u>32.6</u> | <u>27.7</u> | <u>30.5</u> | <u>27.3</u>  |
| -                | <u>ED visits</u>                            | <u>33.6</u> | <u>29.9</u> | <u>31.3</u> | <u>27.8</u>  |
| -                | <u>Hospital admission in 48 hours</u>       | <u>4.0</u>  | <u>6.4</u>  | <u>6.6</u>  | <u>5.7</u>   |
| -                | <u>Other</u>                                | <u>1.5</u>  | <u>4.7</u>  | <u>3.4</u>  | <u>5.1</u>   |
| -                | <u>Any</u>                                  | <u>67.7</u> | <u>62.4</u> | <u>65.2</u> | <u>60.2</u>  |
| -                | <u>None</u>                                 | <u>32.3</u> | <u>37.6</u> | <u>34.8</u> | <u>39.7</u>  |
| <u>Age 20-49</u> | <u>Number of ALI</u>                        | <u>588</u>  | <u>601</u>  | <u>564</u>  | <u>590</u>   |
| -                | <u>MD visits (5+/year)</u>                  | <u>29.1</u> | <u>27.7</u> | <u>28.5</u> | <u>24.3</u>  |
| -                | <u>ED visits</u>                            | <u>34.3</u> | <u>27.6</u> | <u>28.7</u> | <u>27.3</u>  |
| -                | <u>Hospital admission in 48 hours</u>       | <u>6.2</u>  | <u>4.1</u>  | <u>2.9</u>  | <u>3.6</u>   |
| -                | <u>Other</u>                                | <u>2.5</u>  | <u>4.1</u>  | <u>3.1</u>  | <u>7.3</u>   |
| -                | <u>Any</u>                                  | <u>65.8</u> | <u>59.3</u> | <u>3.2</u>  | <u>58.9</u>  |
| -                | <u>None</u>                                 | <u>34.2</u> | <u>40.7</u> | <u>39.7</u> | <u>41.1</u>  |
| <u>Age 50+</u>   | <u>Number of ALI</u>                        | <u>277</u>  | <u>331</u>  | <u>349</u>  | <u>415</u>   |
| -                | <u>MD visits (5+/year)</u>                  | <u>31.5</u> | <u>25.8</u> | <u>25.3</u> | <u>26.9</u>  |
| -                | <u>ED visits</u>                            | <u>33.6</u> | <u>30.6</u> | <u>34.9</u> | <u>31.1</u>  |
| -                | <u>Hospital admission in 48 hours</u>       | <u>7.3</u>  | <u>8.1</u>  | <u>9.9</u>  | <u>6.9</u>   |
| -                | <u>Other</u>                                | <u>3.2</u>  | <u>4.9</u>  | <u>3.2</u>  | <u>1.9</u>   |
| -                | <u>Any</u>                                  | <u>61.4</u> | <u>59.3</u> | <u>63.5</u> | <u>59.9</u>  |
| -                | <u>None</u>                                 | <u>31.8</u> | <u>38.6</u> | <u>36.6</u> | <u>40.1</u>  |

**Table 4: The type of activity-limiting injury as a proportion of all activity-limiting injuries ALI NPHS, Canada, 1996-2006**

| N <sup>2</sup> | Interview cycles<br>Number of ALI | 1996             | 1998             | 2000             | 2002             | 2004             | 2006             |
|----------------|-----------------------------------|------------------|------------------|------------------|------------------|------------------|------------------|
|                |                                   | <sup>1</sup> wt% |
| ALL            | Brain, internal, multiple         | 4.9              | 3.3              | 5.8              | 3.2              | 3.9              | 4.3              |
|                | Fractures/dislocation             | 20.6             | 21.2             | 19.9             | 20.3             | 22.2             | 24.9             |
|                | Burns                             | 5.3              | 3.3              | 4.3              | 2.8              | 4.3              | 3.7              |
|                | Sprains, strains                  | 42.0             | 42.3             | 42.4             | 47.3             | 42.8             | 42.2             |
|                | Cuts, punctures, bites            | 10.2             | 15.5             | 11.8             | 11.6             | 11.1             | 9.7              |
|                | Scrapes, bruises, blisters        | 7.7              | 6.9              | 7.8              | 4.8              | 7.1              | 6.3              |
|                | Other                             | 9.3              | 7.5              | 8.0              | 10.0             | 8.6              | 8.9              |
|                | Total                             | 100.0            | 100.0            | 100.0            | 100.0            | 100.0            | 100.0            |
| Males          | Brain, internal, multiple         | 5.4              | 2.8              | 5.0              | 2.4              | 4.1              | 4.5              |
|                | Fractures/dislocation             | 21.3             | 21.5             | 21.5             | 20.3             | 21.0             | 26.1             |
|                | Burns                             | 5.8              | 2.4              | 3.9              | 3.5              | 4.6              | 2.7              |
|                | Sprains, strains                  | 39.6             | 42.6             | 40.5             | 47.2             | 41.7             | 39.8             |
|                | Cuts, punctures, bites            | 12.2             | 17.4             | 16.7             | 13.9             | 13.6             | 13.1             |
|                | Scrapes, bruises, blisters        | 6.2              | 5.2              | 5.7              | 4.4              | 6.2              | 5.8              |
|                | Other                             | 9.5              | 8.1              | 6.7              | 8.3              | 8.8              | 8.0              |
| Females        | Brain, internal, multiple         | 4.3              | 3.9              | 6.4              | 3.8              | 3.6              | 4.2              |
|                | Fractures/dislocation             | 19.8             | 21.0             | 18.5             | 21.6             | 23.6             | 23.3             |
|                | Burns                             | 4.5              | 4.1              | 4.7              | 3.6              | 4.0              | 4.8              |
|                | Sprains, strains                  | 45.0             | 41.9             | 44.1             | 46.0             | 44.3             | 44.9             |
|                | Cuts, punctures, bites            | 7.8              | 13.3             | 7.7              | 9.1              | 7.9              | 6.0              |
|                | Scrapes, bruises, blisters        | 9.5              | 8.9              | 9.5              | 6.4              | 8.2              | 7.0              |
|                | Other                             | 9.1              | 6.9              | 9.1              | 9.5              | 8.4              | 9.8              |
| Age 20-49      | Brain, internal, multiple         | 4.8              | 3.3              | 4.9              | 3.1              | 3.7              | 3.0              |
|                | Fractures/dislocation             | 17.4             | 19.8             | 22.5             | 17.4             | 18.2             | 22.9             |
|                | Burns                             | 5.5              | 3.3              | 4.1              | 3.5              | 5.0              | 4.8              |
|                | Sprains, strains                  | 43.8             | 47.2             | 42.8             | 51.3             | 50.9             | 46.3             |
|                | Cuts, punctures, bites            | 10.9             | 15.5             | 11.5             | 10.7             | 9.4              | 9.4              |
|                | Scrapes, bruises, blisters        | 8.5              | 5.0              | 7.5              | 4.5              | 4.4              | 4.6              |
|                | Other                             | 9.1              | 5.9              | 6.7              | 9.5              | 8.4              | 9.0              |

|    |         |                            |      |      |      |      |      |      |
|----|---------|----------------------------|------|------|------|------|------|------|
| 1  |         |                            |      |      |      |      |      |      |
| 2  |         |                            |      |      |      |      |      |      |
| 3  |         |                            |      |      |      |      |      |      |
| 4  |         |                            |      |      |      |      |      |      |
| 5  |         |                            |      |      |      |      |      |      |
| 6  |         |                            |      |      |      |      |      |      |
| 7  |         |                            |      |      |      |      |      |      |
| 8  |         |                            |      |      |      |      |      |      |
| 9  |         |                            |      |      |      |      |      |      |
| 10 | Age 50+ | Brain, internal, multiple  | 5.4  | 3.4  | 7.6  | 3.4  | 4.2  | 6.3  |
| 11 |         | Fractures/dislocation      | 30.8 | 24.9 | 13.8 | 26.4 | 29.0 | 27.9 |
| 12 |         | Burns                      | 4.3  | 3.0  | 4.9  | 1.4  | 3.3  | 1.9  |
| 13 |         | Sprains, strains           | 36.2 | 30.2 | 41.7 | 39.0 | 29.1 | 35.8 |
| 14 |         | Cuts, punctures, bites     | 8.1  | 15.2 | 12.5 | 13.4 | 13.7 | 10.3 |
| 15 |         | Scrapes, bruises, blisters | 5.1  | 11.7 | 8.5  | 5.4  | 11.7 | 9.1  |
| 16 |         | Other                      | 10.1 | 11.6 | 11.0 | 11.0 | 9.0  | 8.7  |
| 17 |         |                            |      |      |      |      |      |      |
| 18 |         |                            |      |      |      |      |      |      |
| 19 |         |                            |      |      |      |      |      |      |
| 20 |         |                            |      |      |      |      |      |      |
| 21 |         |                            |      |      |      |      |      |      |
| 22 |         |                            |      |      |      |      |      |      |
| 23 |         |                            |      |      |      |      |      |      |
| 24 |         |                            |      |      |      |      |      |      |
| 25 |         |                            |      |      |      |      |      |      |
| 26 |         |                            |      |      |      |      |      |      |
| 27 |         |                            |      |      |      |      |      |      |
| 28 |         |                            |      |      |      |      |      |      |
| 29 |         |                            |      |      |      |      |      |      |
| 30 |         |                            |      |      |      |      |      |      |
| 31 |         |                            |      |      |      |      |      |      |
| 32 |         |                            |      |      |      |      |      |      |
| 33 |         |                            |      |      |      |      |      |      |
| 34 |         |                            |      |      |      |      |      |      |
| 35 |         |                            |      |      |      |      |      |      |
| 36 |         |                            |      |      |      |      |      |      |
| 37 |         |                            |      |      |      |      |      |      |
| 38 |         |                            |      |      |      |      |      |      |
| 39 |         |                            |      |      |      |      |      |      |
| 40 |         |                            |      |      |      |      |      |      |
| 41 |         |                            |      |      |      |      |      |      |
| 42 |         |                            |      |      |      |      |      |      |
| 43 |         |                            |      |      |      |      |      |      |
| 44 |         |                            |      |      |      |      |      |      |
| 45 |         |                            |      |      |      |      |      |      |
| 46 |         |                            |      |      |      |      |      |      |
| 47 |         |                            |      |      |      |      |      |      |
| 48 |         |                            |      |      |      |      |      |      |
| 49 |         |                            |      |      |      |      |      |      |
| 50 |         |                            |      |      |      |      |      |      |
| 51 |         |                            |      |      |      |      |      |      |
| 52 |         |                            |      |      |      |      |      |      |
| 53 |         |                            |      |      |      |      |      |      |
| 54 |         |                            |      |      |      |      |      |      |
| 55 |         |                            |      |      |      |      |      |      |
| 56 |         |                            |      |      |      |      |      |      |
| 57 |         |                            |      |      |      |      |      |      |
| 58 |         |                            |      |      |      |      |      |      |
| 59 |         |                            |      |      |      |      |      |      |
| 60 |         |                            |      |      |      |      |      |      |

<sup>1</sup> wt%--Weighted percentages making rates representative of the Canadian population

<sup>2</sup> Number of ALI in study population

**Table 5: Odds ratios (OR) and 95% confidence interval (C.I.) of ALI by life style and socioeconomic status, adjusted for sex and age, NPHS, Canada, 1996-2006**

|                                                                                                                                                                                                                                                                                                                                                                                               | 1996        |           | 1998      |           | 2000      |           | 2002      |           | 2004      |           | 2006      |           |           |
|-----------------------------------------------------------------------------------------------------------------------------------------------------------------------------------------------------------------------------------------------------------------------------------------------------------------------------------------------------------------------------------------------|-------------|-----------|-----------|-----------|-----------|-----------|-----------|-----------|-----------|-----------|-----------|-----------|-----------|
|                                                                                                                                                                                                                                                                                                                                                                                               | OR          | 95% C.I.  | OR        | 95% C.I.  | OR        | 95% C.I.  | OR        | 95% C.I.  | OR        | 95% C.I.  | OR        | 95% C.I.  |           |
| <b>Age groups</b>                                                                                                                                                                                                                                                                                                                                                                             |             |           |           |           |           |           |           |           |           |           |           |           |           |
| M/F                                                                                                                                                                                                                                                                                                                                                                                           | 1.4*        | 1.1 - 1.6 | 1.3*      | 1.1 - 1.6 | 0.9       | 0.8 - 1.1 | 1.3*      | 1.1 - 1.5 | 1.4*      | 1.2 - 1.6 | 1.3*      | 1.1 - 1.4 |           |
| 20-39                                                                                                                                                                                                                                                                                                                                                                                         | 2.1*        | 1.6 - 2.9 | 1.9*      | 1.5 - 2.4 | 1.8*      | 1.4 - 2.3 | 2.2*      | 1.8 - 2.7 | 1.8*      | 1.5 - 2.2 | 2.2*      | 1.8 - 2.6 |           |
| 40-59                                                                                                                                                                                                                                                                                                                                                                                         | 1.6*        | 1.1 - 2.1 | 1.4*      | 1.1 - 1.8 | 1.3       | 1.0 - 1.6 | 1.6*      | 1.3 - 2.0 | 1.3       | 1.0 - 1.5 | 1.5*      | 1.2 - 1.8 |           |
| 60+<br>(reference)                                                                                                                                                                                                                                                                                                                                                                            | 1.0         | ~         | 1.0       | ~         | 1.0       | ~         | 1.0       | ~         | 1.0       | ~         | 1.0       | ~         |           |
| <b>Background variables<sup>2</sup></b>                                                                                                                                                                                                                                                                                                                                                       |             |           |           |           |           |           |           |           |           |           |           |           |           |
| Married/<br>Common-law                                                                                                                                                                                                                                                                                                                                                                        | yes/no      | 1.0       | 0.8 - 1.2 | 1.0       | 0.8 - 1.2 | 1.0       | 0.8 - 1.2 | 1.0       | 0.9 - 1.2 | 0.9       | 0.7 - 1.0 | 0.9       | 0.8 - 1.0 |
| Income                                                                                                                                                                                                                                                                                                                                                                                        | low/high    | 1.1       | 0.9 - 1.3 | 1.0       | 0.9 - 1.3 | 1.2       | 1.0 - 1.4 | 0.9       | 0.8 - 1.1 | 1.1       | 0.9 - 1.3 | 1.2       | 1.0 - 1.4 |
| Completed<br>High School                                                                                                                                                                                                                                                                                                                                                                      | yes/no      | 1.2       | 1.0 - 1.5 | 1.1       | 0.9 - 1.3 | 1.0       | 0.8 - 1.2 | 0.9       | 0.8 - 1.1 | 0.9       | 0.7 - 1.0 | 1.1       | 0.9 - 1.3 |
| Rural                                                                                                                                                                                                                                                                                                                                                                                         | yes/no      | 1.1       | 0.9 - 1.4 | 1.1       | 0.9 - 1.3 | 0.9       | 0.7 - 1.1 | 1.1       | 0.9 - 1.3 | 0.8       | 0.7 - 1.0 | 1.0       | 0.8 - 1.1 |
| Non-English<br>immigrant                                                                                                                                                                                                                                                                                                                                                                      | yes/no      | 0.9       | 0.7 - 1.1 | 0.9       | 0.7 - 1.0 | 0.8       | 0.7 - 1.0 | 0.8       | 0.7 - 1.0 | 0.7       | 0.6 - 0.9 | 0.8       | 0.7 - 0.9 |
| 0.6*                                                                                                                                                                                                                                                                                                                                                                                          | 0.5 - 0.8   | 0.7*      | 0.6 - 0.9 | 0.8       | 0.6 - 1.0 | 0.8       | 0.6 - 1.0 | 0.8       | 0.6 - 1.0 | 0.7*      | 0.5 - 0.8 | 0.7*      | 0.6 - 0.9 |
| <b>Health related<sup>3</sup></b>                                                                                                                                                                                                                                                                                                                                                             |             |           |           |           |           |           |           |           |           |           |           |           |           |
| Current<br>smoking                                                                                                                                                                                                                                                                                                                                                                            | yes/no      | 1.1       | 0.9 - 1.4 | 1.1       | 0.9 - 1.3 | 1.2       | 1.0 - 1.5 | 1.2       | 1.0 - 1.5 | 0.9       | 0.8 - 1.1 | 0.9       | 0.7 - 1.1 |
| Physical<br>inactivity                                                                                                                                                                                                                                                                                                                                                                        | yes/no      | 0.8       | 0.7 - 0.9 | 0.8       | 0.7 - 0.9 | 0.8       | 0.6 - 0.9 | 0.9       | 0.8 - 1.1 | 0.8       | 0.7 - 0.9 | 0.8       | 0.7 - 0.9 |
| Obese                                                                                                                                                                                                                                                                                                                                                                                         | yes/no      | 1.2       | 1.0 - 1.5 | 1.2       | 1.0 - 1.5 | 1.1       | 0.9 - 1.3 | 1.0       | 0.9 - 1.2 | 1.1       | 0.9 - 1.3 | 1.0       | 0.8 - 1.1 |
| Alcohol<br>drink /week                                                                                                                                                                                                                                                                                                                                                                        | 9+/less     | 1.2       | 0.9 - 1.5 | 1.2*      | 1.0 - 1.6 | 1.3*      | 1.0 - 1.7 | 1.4*      | 1.2 - 1.8 | 1.2       | 1.0 - 1.5 | 1.5*      | 1.3 - 1.8 |
| Alcohol 5+ at<br>time                                                                                                                                                                                                                                                                                                                                                                         | weekly/less | 1.3*      | 1.0 - 1.5 | 1.4*      | 1.2 - 1.7 | 1.4*      | 1.2 - 1.7 | 1.2*      | 1.0 - 1.5 | 1.3*      | 1.1 - 1.5 | 1.3*      | 1.1 - 1.5 |
| <p>For sex group, females are the reference group</p> <p>For background variables comparison groups, the second listed group for binary variables is the reference group</p> <p>For health-related comparison groups, the second listed group for binary variables is the reference group</p> <p>* Means that there are statistically significant difference compared with control groups</p> |             |           |           |           |           |           |           |           |           |           |           |           |           |

**Table 6: life style, socioeconomic status, and health care utilization of persons with an activity limiting injury before and after the injury, NPHS, Canada, 1994-2006**

|                                                        |               | Before  | During | After | p value* |        |        | N**    |       |
|--------------------------------------------------------|---------------|---------|--------|-------|----------|--------|--------|--------|-------|
|                                                        |               | %       | %      | %     | A vs B   | B vs C | A vs C |        |       |
|                                                        |               | A       | B      | C     |          |        |        |        |       |
| <b>Risky behaviours and socioeconomic status</b>       |               |         |        |       |          |        |        |        |       |
| Income                                                 | low           | 36.3    | 32.1   | 28.5  | <0.001   | <0.001 | <0.001 | 2,892  |       |
| Obese                                                  | obese         | 17.8    | 19.7   | 22.4  | 0.005    | <0.001 | <0.001 | 1,780  |       |
| Physical activity                                      | inactive      | 50.4    | 47.1   | 48.1  | 0.001    | 0.197  | 0.343  | 3,044  |       |
| Smoking                                                | current       | 19.0    | 18.5   | 18.2  | 0.265    | 0.384  | 0.077  | 1,693  |       |
| Alcohol drinking                                       | 9+/week       | 9.6     | 10.7   | 11.2  | 0.048    | 0.535  | 0.349  | 3,548  |       |
| <b>Health-related issues</b>                           |               |         |        |       |          |        |        |        |       |
| Limited activity                                       | yes           | 18.7    | 25.5   | 26.3  | <0.001   | 0.221  | <0.001 | 3,657  |       |
| Health status                                          | poor          | 33.1    | 36.3   | 39.6  | <0.001   | <0.001 | <0.001 | 3,653  |       |
| Medical Doctor                                         | visits        | 5+/year | 26.5   | 34.0  | 29.8     | <0.001 | <0.001 | <0.001 | 3,616 |
| Pain                                                   | yes           | 13.7    | 16.8   | 17.3  | <0.001   | 0.432  | <0.001 | 3,657  |       |
| Stress                                                 | yes           | 29.7    | 31.3   | 29.4  | 0.104    | 0.050  | 0.757  | 2,967  |       |
| <b>Medication use in past 30 days before interview</b> |               |         |        |       |          |        |        |        |       |
| Pain medication                                        | yes           | 61.9    | 70.2   | 70.8  | <0.001   | 0.489  | <0.001 | 3,640  |       |
| Sedatives                                              | /tranquiliser | yes     | 5.7    | 7.2   | 8.1      | 0.001  | 0.055  | <0.001 | 3,639 |
| Antidepressants                                        | yes           | 4.2     | 5.9    | 6.2   | <0.001   | 0.346  | 0.403  | 3,641  |       |

\*P value calculated by McNemar's test

\*\* N of persons making up the matched analysis for the before and after analysis

1  
2  
3  
4  
5  
6  
7  
8  
9  
10  
11  
12 **Page 22: [1] Formatted** hcuser 1/28/2013 2:29:00 PM

13 Right: -0.08"

14 **Page 22: [2] Formatted** hcuser 1/28/2013 2:29:00 PM

15 Left, Right: -0.08"

16 **Page 22: [3] Formatted** hcuser 1/28/2013 2:29:00 PM

17 Right: -0.08"

18 **Page 22: [4] Formatted** hcuser 1/28/2013 2:29:00 PM

19 Left, Right: -0.08"

20 **Page 22: [5] Formatted** hcuser 1/28/2013 2:29:00 PM

21 Right: -0.08"

22 **Page 22: [6] Formatted** hcuser 1/28/2013 2:29:00 PM

23 Left, Right: -0.08"

24 **Page 22: [7] Formatted** hcuser 1/28/2013 2:29:00 PM

25 Right: -0.08"

26 **Page 22: [8] Formatted** hcuser 1/28/2013 2:29:00 PM

27 Left, Right: -0.08"

28 **Page 22: [9] Formatted** hcuser 1/28/2013 2:29:00 PM

29 Right: -0.08"

30 **Page 22: [10] Formatted** hcuser 1/28/2013 2:29:00 PM

31 Left, Right: -0.08"

32 **Page 22: [11] Formatted** hcuser 1/28/2013 2:29:00 PM

33 Right: -0.08"

34 **Page 22: [12] Formatted** hcuser 1/28/2013 2:29:00 PM

35 Left, Right: -0.08"

36 **Page 22: [13] Formatted** hcuser 1/28/2013 2:29:00 PM

37 Right: -0.08"

38 **Page 22: [14] Formatted** hcuser 1/28/2013 2:29:00 PM

39 Left, Right: -0.08"

40 **Page 22: [15] Formatted** hcuser 1/28/2013 2:29:00 PM

41 Right: -0.08"

42 **Page 22: [16] Formatted** hcuser 1/28/2013 2:29:00 PM

43 Left, Right: -0.08"

44 **Page 22: [17] Formatted** hcuser 1/28/2013 2:29:00 PM

45 Right: -0.08"

46 **Page 22: [18] Formatted** hcuser 1/28/2013 2:29:00 PM

47 Left, Right: -0.08" For peer review only - <http://bmjopen.bmj.com/site/about/guidelines.xhtml>

48 **Page 22: [19] Formatted** hcuser 1/28/2013 2:29:00 PM

49 Left, Right: -0.08"

50  
51  
52  
53  
54  
55  
56  
57  
58  
59  
60

1  
2  
3  
4  
5  
6  
7  
8  
9  
10  
11  
12 Left, Right: -0.08"

13 **Page 22: [21] Formatted** hcuser 1/28/2013 2:29:00 PM

14 Left, Right: -0.08"

15 **Page 22: [22] Formatted** hcuser 1/28/2013 2:29:00 PM

16 Left, Right: -0.08"

17 **Page 22: [23] Formatted** hcuser 1/28/2013 2:29:00 PM

18 Left, Right: -0.08"

19 **Page 22: [24] Formatted** hcuser 1/28/2013 2:29:00 PM

20 Right: -0.08"

21 **Page 22: [25] Formatted** hcuser 1/28/2013 2:29:00 PM

22 Left, Right: -0.08"

23 **Page 22: [26] Formatted** hcuser 1/28/2013 2:29:00 PM

24 Right: -0.08"

25 **Page 22: [27] Formatted** hcuser 1/28/2013 2:29:00 PM

26 Left, Right: -0.08"

27 **Page 22: [28] Formatted** hcuser 1/28/2013 2:29:00 PM

28 Left, Right: -0.08"

29 **Page 22: [29] Formatted** hcuser 1/28/2013 2:29:00 PM

30 Left, Right: -0.08"

31 **Page 22: [30] Formatted** hcuser 1/28/2013 2:29:00 PM

32 Left, Right: -0.08"

33 **Page 22: [31] Formatted** hcuser 1/28/2013 2:29:00 PM

34 Left, Right: -0.08"

35 **Page 22: [32] Formatted** hcuser 1/28/2013 2:29:00 PM

36 Left, Right: -0.08"

37 **Page 22: [33] Formatted** hcuser 1/28/2013 2:29:00 PM

38 Right: -0.08"

39 **Page 22: [34] Formatted** hcuser 1/28/2013 2:29:00 PM

40 Left, Right: -0.08"

41 **Page 22: [35] Formatted** hcuser 1/28/2013 2:29:00 PM

42 Right: -0.08"

43 **Page 22: [36] Formatted** hcuser 1/28/2013 2:29:00 PM

44 Left, Right: -0.08"

45 **Page 22: [37] Formatted** hcuser 1/28/2013 2:29:00 PM

46 Right: -0.08"

47 **Page 22: [38] Formatted** hcuser 1/28/2013 2:29:00 PM

48 Left, Right: -0.08"

49 **Page 22: [39] Formatted** hcuser 1/28/2013 2:29:00 PM



1  
2  
3  
4  
5  
6  
7  
8  
9  
10  
11  
12 **Page 22: [40] Formatted** hcuser 1/28/2013 2:29:00 PM

13 Left, Right: -0.08"

14 **Page 22: [41] Formatted** hcuser 1/28/2013 2:29:00 PM

15 Right: -0.08"

16 **Page 22: [42] Formatted** hcuser 1/28/2013 2:29:00 PM

17 Left, Right: -0.08"

18 **Page 22: [43] Formatted** hcuser 1/28/2013 2:29:00 PM

19 Right: -0.08"

20 **Page 22: [44] Formatted** hcuser 1/28/2013 2:29:00 PM

21 Left, Right: -0.08"

22 **Page 22: [45] Formatted** hcuser 1/28/2013 2:29:00 PM

23 Right: -0.08"

24 **Page 22: [46] Formatted** hcuser 1/28/2013 2:29:00 PM

25 Left, Right: -0.08"

26 **Page 22: [47] Formatted** hcuser 1/28/2013 2:29:00 PM

27 Right: -0.08"

28 **Page 22: [48] Formatted** hcuser 1/28/2013 2:29:00 PM

29 Left, Right: -0.08"

30 **Page 22: [49] Formatted** hcuser 1/28/2013 2:29:00 PM

31 Right: -0.08"

32 **Page 22: [50] Formatted** hcuser 1/28/2013 2:29:00 PM

33 Left, Right: -0.08"

34 **Page 22: [51] Formatted** hcuser 1/28/2013 2:29:00 PM

35 Right: -0.08"

36 **Page 22: [52] Formatted** hcuser 1/28/2013 2:29:00 PM

37 Left, Right: -0.08"

38 **Page 22: [53] Formatted** hcuser 1/28/2013 2:29:00 PM

39 Right: -0.08"

40 **Page 22: [54] Formatted** hcuser 1/28/2013 2:29:00 PM

41 Left, Right: -0.08"

42 **Page 22: [55] Formatted** hcuser 1/28/2013 2:29:00 PM

43 Right: -0.08"

44 **Page 22: [56] Formatted** hcuser 1/28/2013 2:29:00 PM

45 Left, Right: -0.08"

46 **Page 22: [57] Formatted** hcuser 1/28/2013 2:29:00 PM

47 Right: -0.08" or peer review only - <http://bmjopen.bmj.com/site/about/guidelines.xhtml>

48 **Page 22: [58] Formatted** hcuser 1/28/2013 2:29:00 PM

49 Left, Right: -0.08"

50  
51  
52  
53  
54  
55  
56  
57  
58  
59  
60

1  
2  
3  
4  
5  
6  
7  
8  
9  
10  
11  
12 Right: -0.08"

13 **Page 22: [60] Formatted** hcuser 1/28/2013 2:29:00 PM

14 Left, Right: -0.08"

15 **Page 22: [61] Formatted** hcuser 1/28/2013 2:29:00 PM

16 Right: -0.08"

17 **Page 22: [62] Formatted** hcuser 1/28/2013 2:29:00 PM

18 Left, Right: -0.08"

19 **Page 22: [63] Formatted** hcuser 1/28/2013 2:29:00 PM

20 Right: -0.08"

21 **Page 22: [64] Formatted** hcuser 1/28/2013 2:29:00 PM

22 Right: -0.08", Line spacing: single

STROBE 2007 (v4) Statement—Checklist of items that should be included in reports of cohort studies

| Section/Topic             | Item # | Recommendation                                                                                                                                                                       | Reported on page # |
|---------------------------|--------|--------------------------------------------------------------------------------------------------------------------------------------------------------------------------------------|--------------------|
| Title and abstract        | 1      | (a) Indicate the study’s design with a commonly used term in the title or the abstract                                                                                               | Page 1, 2          |
|                           |        | (b) Provide in the abstract an informative and balanced summary of what was done and what was found                                                                                  | Page 2, 3          |
| <b>Introduction</b>       |        |                                                                                                                                                                                      | <b>Page 4</b>      |
| Background/rationale      | 2      | Explain the scientific background and rationale for the investigation being reported                                                                                                 | Page 4             |
| Objectives                | 3      | State specific objectives, including any prespecified hypotheses                                                                                                                     | Page 4             |
| <b>Methods</b>            |        |                                                                                                                                                                                      | <b>Page 5</b>      |
| Study design              | 4      | Present key elements of study design early in the paper                                                                                                                              | Page 5             |
| Setting                   | 5      | Describe the setting, locations, and relevant dates, including periods of recruitment, exposure, follow-up, and data collection                                                      | Page 5, 6          |
| Participants              | 6      | (a) Give the eligibility criteria, and the sources and methods of selection of participants. Describe methods of follow-up                                                           | Page 5, 6          |
|                           |        | (b) For matched studies, give matching criteria and number of exposed and unexposed                                                                                                  | Page 5, 6          |
| Variables                 | 7      | Clearly define all outcomes, exposures, predictors, potential confounders, and effect modifiers. Give diagnostic criteria, if applicable                                             | Page 7             |
| Data sources/ measurement | 8*     | For each variable of interest, give sources of data and details of methods of assessment (measurement). Describe comparability of assessment methods if there is more than one group | Page 7             |
| Bias                      | 9      | Describe any efforts to address potential sources of bias                                                                                                                            | Page 7             |
| Study size                | 10     | Explain how the study size was arrived at                                                                                                                                            | Page 7             |
| Quantitative variables    | 11     | Explain how quantitative variables were handled in the analyses. If applicable, describe which groupings were chosen and why                                                         | Page 7, 8          |
| Statistical methods       | 12     | (a) Describe all statistical methods, including those used to control for confounding                                                                                                | Page 7, 8          |
|                           |        | (b) Describe any methods used to examine subgroups and interactions                                                                                                                  | Page 7, 8          |
|                           |        | (c) Explain how missing data were addressed                                                                                                                                          | Page 7, 8          |
|                           |        | (d) If applicable, explain how loss to follow-up was addressed                                                                                                                       | Page 7, 8          |
|                           |        | (e) Describe any sensitivity analyses                                                                                                                                                | Page 7, 8          |
| <b>Results</b>            |        |                                                                                                                                                                                      | <b>Page 8</b>      |

|                          |     |                                                                                                                                                                                                                                                                                                                                                                                                               |                                     |
|--------------------------|-----|---------------------------------------------------------------------------------------------------------------------------------------------------------------------------------------------------------------------------------------------------------------------------------------------------------------------------------------------------------------------------------------------------------------|-------------------------------------|
| Participants             | 13* | (a) Report numbers of individuals at each stage of study—eg numbers potentially eligible, examined for eligibility, confirmed eligible, included in the study, completing follow-up, and analysed<br>(b) Give reasons for non-participation at each stage<br>(c) Consider use of a flow diagram                                                                                                               |                                     |
| Descriptive data         | 14* | (a) Give characteristics of study participants (eg demographic, clinical, social) and information on exposures and potential confounders<br>(b) Indicate number of participants with missing data for each variable of interest<br>(c) Summarise follow-up time (eg, average and total amount)                                                                                                                | Page 5, 6<br>Page 5, 6<br>Page 5, 6 |
| Outcome data             | 15* | Report numbers of outcome events or summary measures over time                                                                                                                                                                                                                                                                                                                                                |                                     |
| Main results             | 16  | (a) Give unadjusted estimates and, if applicable, confounder-adjusted estimates and their precision (eg, 95% confidence interval). Make clear which confounders were adjusted for and why they were included<br>(b) Report category boundaries when continuous variables were categorized<br>(c) If relevant, consider translating estimates of relative risk into absolute risk for a meaningful time period | Page 8, 9                           |
| Other analyses           | 17  | Report other analyses done—eg analyses of subgroups and interactions, and sensitivity analyses                                                                                                                                                                                                                                                                                                                |                                     |
| <b>Discussion</b>        |     |                                                                                                                                                                                                                                                                                                                                                                                                               | Page 9-13                           |
| Key results              | 18  | Summarise key results with reference to study objectives                                                                                                                                                                                                                                                                                                                                                      | Page 9, 10, 11                      |
| <b>Limitations</b>       |     |                                                                                                                                                                                                                                                                                                                                                                                                               | Page 12                             |
| Interpretation           | 20  | Give a cautious overall interpretation of results considering objectives, limitations, multiplicity of analyses, results from similar studies, and other relevant evidence                                                                                                                                                                                                                                    | Page 9-13                           |
| Generalisability         | 21  | Discuss the generalisability (external validity) of the study results                                                                                                                                                                                                                                                                                                                                         |                                     |
| <b>Other information</b> |     |                                                                                                                                                                                                                                                                                                                                                                                                               |                                     |
| Funding                  | 22  | Give the source of funding and the role of the funders for the present study and, if applicable, for the original study on which the present article is based                                                                                                                                                                                                                                                 | Page 3                              |

\*Give information separately for cases and controls in case-control studies and, if applicable, for exposed and unexposed groups in cohort and cross-sectional studies.

**Note:** An Explanation and Elaboration article discusses each checklist item and gives methodological background and published examples of transparent reporting. The STROBE checklist is best used in conjunction with this article (freely available on the Web sites of PLoS Medicine at <http://www.plosmedicine.org/>, Annals of Internal Medicine at <http://www.annals.org/>, and Epidemiology at <http://www.epidem.com/>). Information on the STROBE Initiative is available at [www.strobe-statement.org](http://www.strobe-statement.org).
